# Supplementary material for: Molecular determinants of the Ska-Ndc80 interaction and their influence on microtubule tracking and force-coupling
Source: eLife. 2019 Dec 5;8:e49539. doi: 10.7554/eLife.49539 (PMC6927755; doi:10.7554/eLife.49539)
Supplement: Supplementary file 1. [file elife-49539-supp1.xlsx]

## Sheet: Supplementary File 1a
				dephosphorylated Ska + Ndc80		phosphorylated Ska		phosphorylated Ska + Ndc80
Protein	Position	Residue	CDK consensus [T/S P]	Localization prob	Score	Localization prob	Score	Localization prob	Score
NDC80	77	S		0.333329	46.592			0.507631	115.57
NDC80	201	S		0.560104	168.78			0.569178	156.05
NDC80	202	S	yes	0.815307	124.79			0.5	131.24
NDC80	616	S		0.998588	73.546			0.999999	141.86
NUF2	171	S		1	155.11			1	224.86
NUF2	326	S						0.992	211.12
SPC25	168	S	yes	0.999992	98.694			1	156.5
SKA2	101	S	yes	0.999917	190.85	0.999997	170.66	0.999835	198.52
SKA3	34	S						1	150.12
SKA3	110	S				1	197.98	1	294.77
SKA3	119	S		0.992697	44.258	1	181.72	1	246
SKA3	124	S				0.999986	181.24	0.999997	172.74
SKA3	146	S				0.672907	66.893	0.666262	186.77
SKA3	149	S				0.999362	191.93	0.999229	210.09
SKA3	152	S	yes	0.499991	80.975	1	149.84	1	206.57
SKA3	155	S	yes	1	98.353	1	162.37	1	222.42
SKA3	159	S				1	147.09	1	136.34
SKA3	190	T	yes	0.842441	90.485	0.999741	228.33	0.999983	247.19
SKA3	193	T				0.499014	128.96	0.743324	133.48
SKA3	196	S				0.499014	128.96	0.792053	133.48
SKA3	217	T	yes	1	90.685	1	180.18	1	197.63
SKA3	228	Y						0.973211	143.57
SKA3	248	S				1	247.6	1	238.21
SKA3	256	S				0.600628	168.65	0.619509	92.41
SKA3	265	T	yes	0.999991	182.09	1	279.93	1	301.7
SKA3	267	S	yes	0.995671	107.98	1	294.93	1	304.71
SKA3	281	T		0.609396	81.016	0.698832	103.67
SKA3	283	S	yes	0.519175	51.606	0.999994	263.52	0.999995	267.36
SKA3	291	T	yes	0.954926	81.016	0.999809	250.26	0.999289	266.29
SKA3	313	S				0.999988	154.69	0.999992	178.03
SKA3	317	S		0.799537	44.188	0.999939	195.87	0.99994	207.64
SKA3	318	S				0.991423	160.69	0.990914	182.02
SKA3	342	T						0.6043	99.983
SKA3	346	S	yes	0.625469	47.487	0.757856	54.375	0.943535	181.65
SKA3	358	T	yes					0.988341	107.47
SKA3	360	T	yes	0.816798	49.865	0.999913	116.77	0.99965	208.98
SKA3	384	T	yes	1	172.57	1	184.02	1	216.98

## Sheet: Supplementary File 1b
			dephosphorylated Ska + Ndc80						phosphorylated Ska						phosphorylated Ska + Ndc80
Protein	Position	CDK consensus site (T/S P)	Localization prob	PEP	Score	Intensity ___1	Intensity ___2	Intensity ___3	Localization prob	PEP	Score	Intensity ___1	Intensity ___2	Intensity ___3	Localization prob	PEP	Score	Intensity ___1	Intensity ___2	Intensity ___3	Number of Phospho (STY)	Peptide and phospho (STY) Probabilities
NDC80	77		0.333329	9.79399e-06	46.592										0.507631	9.02544e-72	115.57	21352000			1	NSQLGIFS(0.215)S(0.277)S(0.508)EK
NDC80	201		0.560104	3.72893e-246	168.78	654410000									0.569178	3.59261e-192	156.05	3664500000			1	ES(0.569)S(0.431)PLFDDGQPWGEETEDGIMHNK
NDC80	202	yes	0.815307	9.71529e-105	124.79										0.5	1.1562e-123	131.24	187460000			1	ES(0.185)S(0.815)PLFDDGQPWGEETEDGIMHNK
NDC80	616		0.998588	1.71458e-19	73.546	99614000									0.999999	1.5277e-134	141.86	248130000			1	VDREYEECMS(1)EDLSENIK
NUF2	171		1	4.73762e-178	155.11	172720000									1	0	224.86	391580000			1	LERLDS(1)VPVEEQEEFK
NUF2	326														0.992	0	211.12	24535000			1	ESLNLEDQIES(0.992)DES(0.008)ELK
SPC25	168	yes	0.999992	3.12209e-49	98.694	102820000									1	2.4569e-179	156.5	310730000			1	NPES(1)PFMFSLHLNEAR
SKA2	101	yes	0.999917	2.5477e-274	190.85	17195000000			0.999997	5.72217e-216	170.66	12392000000			0.999835	0	198.52	28599000000			1	QTDLELS(1)PLTK
SKA3	34														1	6.47646e-154	150.12	64444000			1	ALDGEES(1)DFEDYPMR
SKA3	110								1	0	197.98	7684400000	1056900000		1	0	294.77	12674000000	996300000		1;2	KNS(1)VHEQEAINS(1)DPELSNCENFQK
SKA3	119		0.992697	1.10802e-07	44.258	27557000			1	1.44553e-276	181.72	3938800000	1056900000		1	0	246	5619800000	996300000		1;2	NSVHEQEAINS(1)DPELSNCENFQK
SKA3	124								0.999986	4.72673e-276	181.24	279160000	131550000		0.999997	3.64715e-246	172.74	292250000	238170000		1;2	NSVHEQEAINSDPELS(1)NCENFQK
SKA3	139								0.999993	3.39257e-40	95.264	27955000			0.998227	4.30268e-40	93.494	33383000			1	DDLS(1)DPPVASSCISEK
SKA3	145								0.554969	2.02929e-21	73.574	34670000	16453000		0.549049	2.86904e-15	68.445		63819000		1;2	TDVKDDLSDPPVAS(0.555)S(0.414)CIS(0.031)EK
SKA3	146								0.672907	4.06379e-14	66.893	27920000	30651000		0.666262	2.96334e-292	186.77	92014000	29925000		1;2	TDVKDDLSDPPVAS(0.25)S(0.673)CIS(0.077)EK
SKA3	149								0.999362	3.04332e-293	191.93	154160000	30651000		0.999229	0	210.09	131210000	63819000		1;2	DDLSDPPVASSCIS(0.999)EK
SKA3	152	yes	0.499991	1.76506e-27	80.975	254860000			1	6.11751e-167	149.84	176250000	1352400000		1	0	206.57	10334000000	2649100000		1;2	S(1)PRS(1)PQLSDFGLER
SKA3	155	yes	1	4.83619e-42	98.353	40484000			1	6.01297e-200	162.37	2372800000	504390000		1	0	222.42	3564100000	942620000		1;2	S(1)PQLS(1)DFGLER
SKA3	159								1	1.26031e-152	147.09		3660900		1	6.48601e-131	136.34		34580000		2	S(1)PQLS(1)DFGLER
SKA3	169								0.996514	9.33454e-08	58.079	50077000			0.99761	7.41347e-09	58.093	67387000			1	Y(0.002)IVS(0.998)QVLPNPPQAVNNYK
SKA3	190	yes	0.842441	2.22149e-57	90.485	61488000			0.999741	0	228.33	3134900000			0.999983	0	247.19	4017000000	40037000		1;2	EEPVIVT(1)PPTK
SKA3	193								0.499014	3.59761e-112	128.96				0.743324	1.26042e-112	133.48	25773000	28621000		1;2	EEPVIVT(0.996)PPT(0.743)KQS(0.261)LVK
SKA3	196								0.499014	3.59761e-112	128.96				0.792053	1.26042e-112	133.48	51435000	11416000		1;2	EEPVIVT(0.003)PPT(0.205)KQS(0.792)LVK
SKA3	217	yes	1	8.41205e-30	90.685	23271000			1	1.08427e-235	180.18	758130000			1	0	197.63	2252900000			1	MDDFECVT(1)PK
SKA3	228														0.973211	1.4274e-141	143.57	69579000			1	LEHFGIS(0.004)EY(0.973)T(0.023)MCLNEDYTMGLK
SKA3	248								1	0	247.6	60503000	87589000		1	0	238.21	98023000	140240000		1;2	NNKS(1)EEAIDTESRLNDNVFATPSPIIQQLEK
SKA3	254														0.619509	3.08503e-51	92.41		22521000		2	S(0.011)EEAIDT(0.62)ES(0.62)RLNDNVFAT(0.62)PS(0.131)PIIQQLEK
SKA3	256								0.600628	2.21018e-254	168.65				0.619509	3.08503e-51	92.41		22521000		2	S(0.011)EEAIDT(0.62)ES(0.62)RLNDNVFAT(0.62)PS(0.131)PIIQQLEK
SKA3	265	yes	0.999991	2.11861e-264	182.09	62238000			1	0	279.93	3586100000	336760000		1	0	301.7	4610300000	1928800000		1;2	LNDNVFAT(1)PS(1)PIIQQLEK
SKA3	267	yes	0.995671	9.68366e-64	107.98	38278000			1	0	294.93	2640000000	336760000		1	0	304.71	3937100000	1928800000		1;2	LNDNVFAT(1)PS(1)PIIQQLEK
SKA3	281		0.609396	3.10745e-30	81.016		10577000		0.698832	4.19611e-66	103.67		11438000								2	S(0.028)DAEY(0.05)T(0.699)NS(0.233)PLVPT(0.581)FCT(0.409)PGLK
SKA3	283	yes	0.519175	3.65412e-07	51.606		12232000		0.999994	0	263.52	1517900000	1559800000		0.999995	0	267.36	2745700000	1148300000		1;2	SDAEYTNS(1)PLVPTFCTPGLK
SKA3	288								0.580859	2.18137e-05	42.068		11438000								2	S(0.028)DAEY(0.05)T(0.699)NS(0.233)PLVPT(0.581)FCT(0.409)PGLK
SKA3	291	yes	0.954926	3.10745e-30	81.016		22809000		0.999809	0	250.26	3314000000	1559800000		0.999289	0	266.29	5255000000	1148300000		1;2	S(0.002)DAEY(0.005)T(0.394)NS(0.599)PLVPTFCT(1)PGLK
SKA3	302								0.999981	3.42862e-38	93.494	15708000			0.999974	1.77359e-20	80.534	34055000			1	NS(1)IALVSTNYPLSK
SKA3	313								0.999988	4.44927e-176	154.69	44806000			0.999992	1.74503e-256	178.03	81342000			1	NSIALVSTNYPLS(1)K
SKA3	317		0.799537	4.65891e-05	44.188	8282400			0.999939	0	195.87	553660000			0.99994	0	207.64	1172000000			1	TNS(1)SSNDLEVEDR
SKA3	318								0.991423	1.18263e-194	160.69	199570000			0.990914	4.56107e-250	182.02	318680000			1	TNS(0.001)S(0.991)S(0.007)NDLEVEDR
SKA3	342														0.6043	1.6646e-89	99.983		53940000		2	TSLVLNSDT(0.006)CFENLT(0.604)DPS(0.206)S(0.182)PT(0.005)IS(0.025)S(0.121)Y(0.064)ENLLRT(0.659)PT(0.123)PPEVT(0.005)K
SKA3	346	yes	0.625469	8.00038e-14	47.487	6514000			0.757856	7.07413e-15	54.375	29319000			0.943535	6.1938e-294	181.65	1515200000	45162000		1;2	TSLVLNSDTCFENLTDPS(0.019)S(0.944)PT(0.036)IS(0.001)SYENLLR
SKA3	358	yes													0.988341	1.60406e-105	107.47		109900000		2	NLLRT(0.994)PT(0.006)PPEVTKIPE
SKA3	360	yes	0.816798	8.30618e-07	49.865	32886000			0.999913	2.47491e-61	116.77	603020000			0.99965	0	208.98	3058800000	136280000		1;2	TPT(1)PPEVTK
SKA3	380								0.901423	0.00173663	66.692										1	Y(0.082)NS(0.901)NLAT(0.017)PIAIK
SKA3	384	yes	1	9.70466e-221	172.57	1043800000			1	1.29748e-250	184.02	31217000000			1	0	216.98	34174000000			1	YNSNLAT(1)PIAIK

## Sheet: Supplementary File 1c
	Dataset		Protein1		Pos1	Protein2		Pos2			Dataset		Protein		Pos1		Pos2
1	Ska	Inter	SKA1	K	21	SKA2	K	54		1	Ska	Intra	SKA1	K	21	T	34
2	Ska	Inter	SKA1	K	22	SKA2	K	48		2	Ska	Intra	SKA1	K	21	K	166
3	Ska	Inter	SKA1	K	22	SKA2	K	54		3	Ska	Intra	SKA1	K	21	K	170
4	Ska	Inter	SKA1	K	21	SKA3	K	10		4	Ska	Intra	SKA1	K	21	T	202
5	Ska	Inter	SKA1	K	21	SKA3	S	13		5	Ska	Intra	SKA1	K	22	T	34
6	Ska	Inter	SKA1	K	21	SKA3	S	16		6	Ska	Intra	SKA1	K	22	T	202
7	Ska	Inter	SKA1	K	21	SKA3	T	22		7	Ska	Intra	SKA1	T	23	K	21
8	Ska	Inter	SKA1	K	21	SKA3	S	169		8	Ska	Intra	SKA1	S	25	K	21
9	Ska	Inter	SKA1	K	21	SKA3	K	247		9	Ska	Intra	SKA1	K	166	S	133
10	Ska	Inter	SKA1	K	21	SKA3	K	399		10	Ska	Intra	SKA1	K	170	Y	176
11	Ska	Inter	SKA1	K	21	SKA3	K	410		11	Ska	Intra	SKA1	Y	176	K	166
12	Ska	Inter	SKA1	K	22	SKA3	K	10		12	Ska	Intra	SKA1	K	184	Y	176
13	Ska	Inter	SKA1	K	22	SKA3	Y	39		13	Ska	Intra	SKA1	Y	194	K	203
14	Ska	Inter	SKA1	K	22	SKA3	K	247		14	Ska	Intra	SKA1	T	205	K	22
15	Ska	Inter	SKA1	K	22	SKA3	K	399		15	Ska	Intra	SKA1	K	206	K	22
16	Ska	Inter	SKA1	K	22	SKA3	S	408		16	Ska	Intra	SKA1	K	206	Y	194
17	Ska	Inter	SKA1	K	22	SKA3	K	410		17	Ska	Intra	SKA1	K	206	T	202
18	Ska	Inter	SKA1	T	34	SKA3	K	247		18	Ska	Intra	SKA1	K	206	Y	209
19	Ska	Inter	SKA1	S	174	SKA3	K	399		19	Ska	Intra	SKA1	T	220	K	227
20	Ska	Inter	SKA1	K	184	SKA3	K	247		20	Ska	Intra	SKA1	K	223	K	227
21	Ska	Inter	SKA1	S	188	SKA3	K	247		21	Ska	Intra	SKA1	S	242	K	203
22	Ska	Inter	SKA1	Y	194	SKA3	K	92		22	Ska	Intra	SKA2	S	17	K	48
23	Ska	Inter	SKA1	Y	194	SKA3	K	247		23	Ska	Intra	SKA2	Y	21	K	31
24	Ska	Inter	SKA1	Y	194	SKA3	K	399		24	Ska	Intra	SKA2	Y	24	K	31
25	Ska	Inter	SKA1	Y	194	SKA3	K	410		25	Ska	Intra	SKA2	K	48	Y	28
26	Ska	Inter	SKA1	T	202	SKA3	K	247		26	Ska	Intra	SKA2	K	48	K	31
27	Ska	Inter	SKA1	T	205	SKA3	K	10		27	Ska	Intra	SKA2	S	51	K	54
28	Ska	Inter	SKA1	T	205	SKA3	K	247		28	Ska	Intra	SKA2	K	54	K	54
29	Ska	Inter	SKA1	T	205	SKA3	K	399		29	Ska	Intra	SKA2	K	54	K	65
30	Ska	Inter	SKA1	K	206	SKA3	S	6		30	Ska	Intra	SKA2	Y	57	K	65
31	Ska	Inter	SKA1	K	206	SKA3	K	10		31	Ska	Intra	SKA2	T	59	K	54
32	Ska	Inter	SKA1	K	206	SKA3	K	64		32	Ska	Intra	SKA2	T	59	K	65
33	Ska	Inter	SKA1	K	206	SKA3	K	99		33	Ska	Intra	SKA2	Y	61	K	65
34	Ska	Inter	SKA1	K	206	SKA3	Y	100		34	Ska	Intra	SKA2	K	65	K	65
35	Ska	Inter	SKA1	K	206	SKA3	K	247		35	Ska	Intra	SKA2	S	74	K	65
36	Ska	Inter	SKA1	K	206	SKA3	S	408		36	Ska	Intra	SKA2	K	75	T	81
37	Ska	Inter	SKA1	S	242	SKA3	K	99		37	Ska	Intra	SKA2	S	76	K	65
38	Ska	Inter	SKA1	S	242	SKA3	K	247		38	Ska	Intra	SKA2	K	83	K	91
39	Ska	Inter	SKA1	S	242	SKA3	K	399		39	Ska	Intra	SKA3	S	6	K	10
40	Ska	Inter	SKA1	T	250	SKA3	K	247		40	Ska	Intra	SKA3	S	6	K	64
41	Ska	Inter	SKA1	T	250	SKA3	K	399		41	Ska	Intra	SKA3	S	6	K	92
42	Ska	Inter	SKA2	K	65	SKA1	K	217		42	Ska	Intra	SKA3	S	6	K	99
43	Ska	Inter	SKA2	T	32	SKA3	K	92		43	Ska	Intra	SKA3	S	6	K	247
44	Ska	Inter	SKA2	K	48	SKA3	K	247		44	Ska	Intra	SKA3	S	6	K	399
45	Ska	Inter	SKA2	Y	57	SKA3	K	64		45	Ska	Intra	SKA3	S	6	K	410
46	Ska	Inter	SKA2	T	59	SKA3	K	64		46	Ska	Intra	SKA3	K	10	K	10
47	Ska	Inter	SKA2	T	59	SKA3	K	399		47	Ska	Intra	SKA3	K	10	S	13
48	Ska	Inter	SKA2	Y	61	SKA3	K	64		48	Ska	Intra	SKA3	K	10	S	16
49	Ska	Inter	SKA2	Y	61	SKA3	K	399		49	Ska	Intra	SKA3	K	10	K	92
50	Ska	Inter	SKA2	K	65	SKA3	K	64		50	Ska	Intra	SKA3	K	10	K	247
51	Ska	Inter	SKA2	K	65	SKA3	K	247		51	Ska	Intra	SKA3	K	10	K	399
52	Ska	Inter	SKA2	K	65	SKA3	K	399		52	Ska	Intra	SKA3	T	22	K	247
53	Ska	Inter	SKA2	S	74	SKA3	K	64		53	Ska	Intra	SKA3	T	79	K	247
54	Ska	Inter	SKA2	K	75	SKA3	K	64		54	Ska	Intra	SKA3	S	87	K	99
55	Ska	Inter	SKA2	K	84	SKA3	Y	45		55	Ska	Intra	SKA3	S	87	K	247
56	Ska	Inter	SKA2	T	85	SKA3	K	99		56	Ska	Intra	SKA3	K	92	K	92
57	Ska	Inter	SKA3	S	6	SKA1	K	21		57	Ska	Intra	SKA3	K	92	Y	96
58	Ska	Inter	SKA3	S	6	SKA1	K	22		58	Ska	Intra	SKA3	K	92	K	99
59	Ska	Inter	SKA3	S	6	SKA1	K	166		59	Ska	Intra	SKA3	K	92	K	247
60	Ska	Inter	SKA3	K	10	SKA1	K	166		60	Ska	Intra	SKA3	K	92	K	399
61	Ska	Inter	SKA3	K	10	SKA1	K	217		61	Ska	Intra	SKA3	Y	96	K	247
62	Ska	Inter	SKA3	S	13	SKA1	K	203		62	Ska	Intra	SKA3	K	99	S	34
63	Ska	Inter	SKA3	S	13	SKA1	K	206		63	Ska	Intra	SKA3	K	99	K	247
64	Ska	Inter	SKA3	K	64	SKA1	K	166		64	Ska	Intra	SKA3	S	145	K	247
65	Ska	Inter	SKA3	K	247	SKA1	S	133		65	Ska	Intra	SKA3	K	247	S	34
66	Ska	Inter	SKA3	K	247	SKA1	K	166		66	Ska	Intra	SKA3	K	247	S	103
67	Ska	Inter	SKA3	T	299	SKA1	K	153		67	Ska	Intra	SKA3	K	247	K	241
68	Ska	Inter	SKA3	K	399	SKA1	K	135		68	Ska	Intra	SKA3	S	394	K	399
69	Ska	Inter	SKA3	K	399	SKA1	K	166		69	Ska	Intra	SKA3	K	399	S	16
70	Ska	Inter	SKA3	K	410	SKA1	S	133		70	Ska	Intra	SKA3	K	399	T	22
71	Ska	Inter	SKA3	K	410	SKA1	K	166		71	Ska	Intra	SKA3	K	399	Y	39
72	Ska	Inter	SKA3	K	410	SKA1	K	170		72	Ska	Intra	SKA3	K	399	K	64
73	Ska	Inter	SKA3	K	410	SKA1	T	202		73	Ska	Intra	SKA3	K	399	K	99
74	Ska	Inter	SKA3	S	6	SKA2	K	14		74	Ska	Intra	SKA3	K	399	S	155
75	Ska	Inter	SKA3	S	6	SKA2	K	54		75	Ska	Intra	SKA3	K	399	K	247
76	Ska	Inter	SKA3	S	6	SKA2	K	65		76	Ska	Intra	SKA3	K	399	S	248
77	Ska	Inter	SKA3	K	10	SKA2	K	54		77	Ska	Intra	SKA3	K	399	T	342
78	Ska	Inter	SKA3	K	10	SKA2	K	65		78	Ska	Intra	SKA3	K	399	S	345
79	Ska	Inter	SKA3	K	92	SKA2	K	14		79	Ska	Intra	SKA3	K	399	K	399
80	Ska	Inter	SKA3	K	247	SKA2	K	14		80	Ska	Intra	SKA3	S	408	K	10
81	Ska	Inter	SKA3	K	399	SKA2	K	14		81	Ska	Intra	SKA3	S	408	K	64
82	Ska	Inter	SKA3	K	399	SKA2	S	17		82	Ska	Intra	SKA3	S	408	K	92
83	Ska	Inter	SKA3	K	399	SKA2	Y	21		83	Ska	Intra	SKA3	S	408	K	99
84	Ska	Inter	SKA3	K	399	SKA2	K	31		84	Ska	Intra	SKA3	S	408	K	247
85	Ska	Inter	SKA3	S	408	SKA2	K	65		85	Ska	Intra	SKA3	S	408	K	399
86	Ska	Inter	SKA3	K	410	SKA2	K	14		86	Ska	Intra	SKA3	S	408	K	410
87	Ska	Inter	SKA3	K	410	SKA2	S	17		87	Ska	Intra	SKA3	K	410	K	10
88	Ska	Inter	SKA3	K	410	SKA2	Y	21		88	Ska	Intra	SKA3	K	410	S	16
89	Ska	Inter	SKA3	K	410	SKA2	K	31		89	Ska	Intra	SKA3	K	410	T	22
90	Ska	Inter	SKA3	K	410	SKA2	K	48		90	Ska	Intra	SKA3	K	410	K	80
										91	Ska	Intra	SKA3	K	410	K	92
										92	Ska	Intra	SKA3	K	410	K	99
										93	Ska	Intra	SKA3	K	410	S	145
										94	Ska	Intra	SKA3	K	410	S	155
										95	Ska	Intra	SKA3	K	410	K	247
										96	Ska	Intra	SKA3	K	410	K	399
										97	Ska	Intra	SKA3	K	410	K	410
	Dataset		Protein1		Pos1	Protein2		Pos2			Dataset		Protein1		Pos1		Pos2
1	Ska:Ndc80	Inter	NDC80	T	61	NUF2	K	400		1	Ska:Ndc80	Intra	NDC80	S	66	K	59
2	Ska:Ndc80	Inter	NDC80	K	288	NUF2	K	165		2	Ska:Ndc80	Intra	NDC80	S	66	K	156
3	Ska:Ndc80	Inter	NDC80	K	577	NUF2	K	400		3	Ska:Ndc80	Intra	NDC80	K	271	K	255
4	Ska:Ndc80	Inter	NDC80	K	577	NUF2	K	409		4	Ska:Ndc80	Intra	NDC80	K	271	S	295
5	Ska:Ndc80	Inter	NDC80	K	577	NUF2	S	419		5	Ska:Ndc80	Intra	NDC80	K	288	S	295
6	Ska:Ndc80	Inter	NDC80	K	577	NUF2	K	427		6	Ska:Ndc80	Intra	NDC80	T	350	K	360
7	Ska:Ndc80	Inter	NDC80	K	577	NUF2	T	428		7	Ska:Ndc80	Intra	NDC80	K	360	S	362
8	Ska:Ndc80	Inter	NDC80	S	8	SKA3	K	399		8	Ska:Ndc80	Intra	NDC80	T	384	K	393
9	Ska:Ndc80	Inter	NDC80	S	66	SKA3	K	399		9	Ska:Ndc80	Intra	NDC80	K	385	T	350
10	Ska:Ndc80	Inter	NDC80	K	288	SKA3	S	408		10	Ska:Ndc80	Intra	NDC80	K	385	K	385
11	Ska:Ndc80	Inter	NDC80	K	504	SKA3	K	247		11	Ska:Ndc80	Intra	NDC80	K	427	Y	453
12	Ska:Ndc80	Inter	NDC80	K	577	SKA3	K	247		12	Ska:Ndc80	Intra	NDC80	T	502	K	497
13	Ska:Ndc80	Inter	NDC80	K	577	SKA3	K	399		13	Ska:Ndc80	Intra	NDC80	K	504	S	496
14	Ska:Ndc80	Inter	NDC80	K	638	SPC24	K	50		14	Ska:Ndc80	Intra	NDC80	K	504	K	497
15	Ska:Ndc80	Inter	NDC80	S	5	SPC25	K	216		15	Ska:Ndc80	Intra	NDC80	K	577	T	350
16	Ska:Ndc80	Inter	NDC80	K	577	SPC25	{	1		16	Ska:Ndc80	Intra	NDC80	K	577	K	360
17	Ska:Ndc80	Inter	NDC80	K	606	SPC25	K	21		17	Ska:Ndc80	Intra	NDC80	K	629	S	640
18	Ska:Ndc80	Inter	NDC80	K	629	SPC25	K	37		18	Ska:Ndc80	Intra	NDC80	K	633	K	629
19	Ska:Ndc80	Inter	NDC80	K	629	SPC25	K	41		19	Ska:Ndc80	Intra	NDC80	K	633	Y	630
20	Ska:Ndc80	Inter	NDC80	K	629	SPC25	K	52		20	Ska:Ndc80	Intra	NDC80	T	635	K	629
21	Ska:Ndc80	Inter	NDC80	K	633	SPC25	K	52		21	Ska:Ndc80	Intra	NUF2	T	220	K	212
22	Ska:Ndc80	Inter	NDC80	K	638	SPC25	K	73		22	Ska:Ndc80	Intra	NUF2	K	266	K	259
23	Ska:Ndc80	Inter	NDC80	S	640	SPC25	K	73		23	Ska:Ndc80	Intra	NUF2	K	348	K	351
24	Ska:Ndc80	Inter	NUF2	K	219	NDC80	T	350		24	Ska:Ndc80	Intra	NUF2	K	362	K	358
25	Ska:Ndc80	Inter	NUF2	K	243	NDC80	K	360		25	Ska:Ndc80	Intra	NUF2	K	383	Y	388
26	Ska:Ndc80	Inter	NUF2	K	243	NDC80	S	362		26	Ska:Ndc80	Intra	NUF2	K	383	K	400
27	Ska:Ndc80	Inter	NUF2	S	247	NDC80	K	346		27	Ska:Ndc80	Intra	NUF2	Y	388	K	400
28	Ska:Ndc80	Inter	NUF2	K	266	NDC80	T	384		28	Ska:Ndc80	Intra	NUF2	K	400	K	400
29	Ska:Ndc80	Inter	NUF2	K	299	NDC80	K	462		29	Ska:Ndc80	Intra	NUF2	K	418	K	432
30	Ska:Ndc80	Inter	NUF2	K	299	NDC80	T	468		30	Ska:Ndc80	Intra	NUF2	K	456	Y	445
31	Ska:Ndc80	Inter	NUF2	K	309	NDC80	T	468		31	Ska:Ndc80	Intra	NUF2	K	456	K	447
32	Ska:Ndc80	Inter	NUF2	K	348	NDC80	K	504		32	Ska:Ndc80	Intra	NUF2	K	456	K	461
33	Ska:Ndc80	Inter	NUF2	K	349	NDC80	K	504		33	Ska:Ndc80	Intra	NUF2	K	456	T	464
34	Ska:Ndc80	Inter	NUF2	K	400	NDC80	Y	564		34	Ska:Ndc80	Intra	SKA1	K	21	T	34
35	Ska:Ndc80	Inter	NUF2	K	400	NDC80	T	572		35	Ska:Ndc80	Intra	SKA2	K	48	K	31
36	Ska:Ndc80	Inter	NUF2	K	227	SKA3	T	254		36	Ska:Ndc80	Intra	SKA2	K	48	S	37
37	Ska:Ndc80	Inter	NUF2	K	266	SKA3	K	247		37	Ska:Ndc80	Intra	SKA2	K	48	S	39
38	Ska:Ndc80	Inter	NUF2	K	383	SKA3	K	410		38	Ska:Ndc80	Intra	SKA2	S	51	K	31
39	Ska:Ndc80	Inter	NUF2	K	461	SPC24	K	50		39	Ska:Ndc80	Intra	SKA2	K	54	K	65
40	Ska:Ndc80	Inter	NUF2	K	456	SPC25	K	21		40	Ska:Ndc80	Intra	SKA2	S	55	K	65
41	Ska:Ndc80	Inter	NUF2	K	456	SPC25	S	22		41	Ska:Ndc80	Intra	SKA2	Y	61	K	65
42	Ska:Ndc80	Inter	NUF2	K	456	SPC25	S	39		42	Ska:Ndc80	Intra	SKA3	K	10	K	10
43	Ska:Ndc80	Inter	NUF2	K	456	SPC25	K	41		43	Ska:Ndc80	Intra	SKA3	K	10	S	13
44	Ska:Ndc80	Inter	NUF2	K	456	SPC25	K	46		44	Ska:Ndc80	Intra	SKA3	K	92	K	99
45	Ska:Ndc80	Inter	NUF2	K	461	SPC25	K	46		45	Ska:Ndc80	Intra	SKA3	K	92	Y	100
46	Ska:Ndc80	Inter	NUF2	K	461	SPC25	S	48		46	Ska:Ndc80	Intra	SKA3	K	92	Y	102
47	Ska:Ndc80	Inter	NUF2	K	461	SPC25	K	52		47	Ska:Ndc80	Intra	SKA3	K	92	S	103
48	Ska:Ndc80	Inter	SKA1	S	174	NDC80	K	577		48	Ska:Ndc80	Intra	SKA3	K	399	K	247
49	Ska:Ndc80	Inter	SKA1	S	174	NUF2	K	409		49	Ska:Ndc80	Intra	SKA3	K	399	K	399
50	Ska:Ndc80	Inter	SKA1	S	174	NUF2	K	427		50	Ska:Ndc80	Intra	SKA3	K	410	K	10
51	Ska:Ndc80	Inter	SKA1	K	21	SKA2	K	54		51	Ska:Ndc80	Intra	SKA3	K	410	T	254
52	Ska:Ndc80	Inter	SKA1	K	22	SKA2	S	39		52	Ska:Ndc80	Intra	SKA3	K	410	S	256
53	Ska:Ndc80	Inter	SKA1	K	22	SKA2	K	48		53	Ska:Ndc80	Intra	SKA3	K	410	K	399
54	Ska:Ndc80	Inter	SKA1	K	22	SKA2	K	54		54	Ska:Ndc80	Intra	SKA3	K	410	K	410
55	Ska:Ndc80	Inter	SKA1	S	25	SKA2	K	54		55	Ska:Ndc80	Intra	SPC24	K	98	K	50
56	Ska:Ndc80	Inter	SKA1	K	21	SKA3	K	10		56	Ska:Ndc80	Intra	SPC24	K	98	K	112
57	Ska:Ndc80	Inter	SKA1	K	21	SKA3	S	13		57	Ska:Ndc80	Intra	SPC24	K	112	S	147
58	Ska:Ndc80	Inter	SKA1	K	21	SKA3	T	22		58	Ska:Ndc80	Intra	SPC25	K	52	S	39
59	Ska:Ndc80	Inter	SKA1	K	22	SKA3	Y	39		59	Ska:Ndc80	Intra	SPC25	K	52	K	41
60	Ska:Ndc80	Inter	SKA1	K	170	SKA3	S	248		60	Ska:Ndc80	Intra	SPC25	K	52	K	46
61	Ska:Ndc80	Inter	SKA2	K	65	SKA1	T	205		61	Ska:Ndc80	Intra	SPC25	K	52	S	48
62	Ska:Ndc80	Inter	SKA2	Y	61	SKA3	K	64		62	Ska:Ndc80	Intra	SPC25	K	79	K	73
63	Ska:Ndc80	Inter	SKA2	K	65	SKA3	K	64		63	Ska:Ndc80	Intra	SPC25	K	79	K	90
64	Ska:Ndc80	Inter	SKA2	K	75	SKA3	K	64		64	Ska:Ndc80	Intra	SPC25	K	90	K	93
65	Ska:Ndc80	Inter	SKA2	S	76	SKA3	K	64		65	Ska:Ndc80	Intra	SPC25	K	114	Y	110
66	Ska:Ndc80	Inter	SKA3	K	247	NDC80	T	350		66	Ska:Ndc80	Intra	SPC25	K	148	K	203
67	Ska:Ndc80	Inter	SKA3	K	410	NDC80	S	4		67	Ska:Ndc80	Intra	SPC25	K	203	Y	182
68	Ska:Ndc80	Inter	SKA3	K	410	NDC80	T	350		68	Ska:Ndc80	Intra	SPC25	K	203	K	203
69	Ska:Ndc80	Inter	SKA3	K	410	NDC80	S	362		69	Ska:Ndc80	Intra	SPC25	K	203	T	221
70	Ska:Ndc80	Inter	SKA3	S	394	NUF2	K	234		70	Ska:Ndc80	Intra	SPC25	K	203	Y	223
71	Ska:Ndc80	Inter	SKA3	K	410	NUF2	T	220		71	Ska:Ndc80	Intra	SPC25	S	208	K	216
72	Ska:Ndc80	Inter	SKA3	K	410	NUF2	K	400
73	Ska:Ndc80	Inter	SKA3	S	6	SKA1	K	21
74	Ska:Ndc80	Inter	SKA3	S	6	SPC25	K	133
75	Ska:Ndc80	Inter	SKA3	T	79	SPC25	K	21
76	Ska:Ndc80	Inter	SPC24	K	50	NDC80	S	620
77	Ska:Ndc80	Inter	SPC24	K	50	NDC80	K	624
78	Ska:Ndc80	Inter	SPC24	K	98	NDC80	T	350
79	Ska:Ndc80	Inter	SPC24	K	98	SPC25	K	84
80	Ska:Ndc80	Inter	SPC25	K	21	NDC80	T	591
81	Ska:Ndc80	Inter	SPC25	K	21	NDC80	S	595
82	Ska:Ndc80	Inter	SPC25	K	21	NDC80	K	598
83	Ska:Ndc80	Inter	SPC25	K	41	NDC80	Y	630
84	Ska:Ndc80	Inter	SPC25	K	203	NDC80	S	362
85	Ska:Ndc80	Inter	SPC25	K	50	NUF2	K	461
86	Ska:Ndc80	Inter	SPC25	K	52	SKA3	K	247
	Dataset		Protein1		Pos1	Protein2		Pos2			Dataset		Protein1		Pos1		Pos2
1	Ndc80	Inter	SPC24	K	98	NDC80	T	350		1	Ndc80	Intra	NDC80	K	271	K	255
2	Ndc80	Inter	SPC24	K	98	NDC80	K	288		2	Ndc80	Intra	NDC80	S	66	K	288
3	Ndc80	Inter	SPC24	K	50	SPC25	T	221		3	Ndc80	Intra	SPC24	K	98	K	112
4	Ndc80	Inter	SPC24	K	50	NDC80	S	21		4	Ndc80	Intra	NUF2	Y	388	K	400
5	Ndc80	Inter	NDC80	K	577	NUF2	K	409		5	Ndc80	Intra	NUF2	Y	388	K	342
6	Ndc80	Inter	SPC24	K	50	NDC80	K	624		6	Ndc80	Intra	NUF2	T	452	K	461
7	Ndc80	Inter	SPC24	K	50	NDC80	K	346		7	Ndc80	Intra	NUF2	T	261	K	383
8	Ndc80	Inter	SPC24	K	112	SPC25	K	216		8	Ndc80	Intra	NUF2	K	456	Y	445
9	Ndc80	Inter	NUF2	Y	388	SPC25	K	203		9	Ndc80	Intra	NUF2	K	456	T	464
10	Ndc80	Inter	NDC80	K	577	NUF2	K	427		10	Ndc80	Intra	NUF2	K	456	S	444
11	Ndc80	Inter	NDC80	K	577	NUF2	T	428		11	Ndc80	Intra	NUF2	K	456	K	461
12	Ndc80	Inter	NDC80	K	577	NUF2	K	416		12	Ndc80	Intra	NUF2	K	456	K	447
13	Ndc80	Inter	SPC25	S	39	SPC24	K	50		13	Ndc80	Intra	NUF2	K	418	K	432
14	Ndc80	Inter	NDC80	K	577	NUF2	K	342		14	Ndc80	Intra	NUF2	K	383	Y	388
15	Ndc80	Inter	NDC80	K	288	SPC24	K	50		15	Ndc80	Intra	NUF2	K	383	T	372
16	Ndc80	Inter	NDC80	K	288	SPC25	K	203		16	Ndc80	Intra	NUF2	K	383	K	400
17	Ndc80	Inter	SPC25	K	21	NDC80	T	591		17	Ndc80	Intra	NDC80	T	635	K	629
18	Ndc80	Inter	SPC25	K	203	SPC24	K	112		18	Ndc80	Intra	NDC80	T	384	K	393
19	Ndc80	Inter	NDC80	K	504	NUF2	K	400		19	Ndc80	Intra	NDC80	T	350	K	360
20	Ndc80	Inter	NUF2	Y	254	NDC80	K	360		20	Ndc80	Intra	NDC80	S	66	K	59
21	Ndc80	Inter	SPC25	K	52	SPC24	K	50		21	Ndc80	Intra	SPC24	K	98	K	50
22	Ndc80	Inter	SPC25	K	21	NDC80	K	598		22	Ndc80	Intra	SPC24	T	57	K	50
23	Ndc80	Inter	SPC25	K	50	NUF2	K	461		23	Ndc80	Intra	SPC25	K	114	K	107
24	Ndc80	Inter	SPC25	K	21	NDC80	S	595		24	Ndc80	Intra	SPC25	K	37	S	48
25	Ndc80	Inter	NUF2	Y	388	NDC80	K	504		25	Ndc80	Intra	SPC25	T	204	K	216
26	Ndc80	Inter	NDC80	K	577	SPC24	T	105		26	Ndc80	Intra	SPC25	S	39	K	46
27	Ndc80	Inter	NUF2	T	452	SPC25	K	21		27	Ndc80	Intra	SPC25	S	208	K	216
28	Ndc80	Inter	NDC80	S	4	SPC25	K	203		28	Ndc80	Intra	SPC25	K	90	K	93
29	Ndc80	Inter	NUF2	K	400	NDC80	T	571		29	Ndc80	Intra	SPC25	K	79	K	90
30	Ndc80	Inter	NUF2	K	400	NDC80	T	570		30	Ndc80	Intra	SPC25	K	52	S	48
31	Ndc80	Inter	NDC80	K	638	SPC24	K	50		31	Ndc80	Intra	SPC25	K	52	K	46
32	Ndc80	Inter	NDC80	K	638	SPC25	K	73		32	Ndc80	Intra	SPC25	K	52	K	41
33	Ndc80	Inter	NUF2	K	348	NDC80	K	504		33	Ndc80	Intra	SPC25	K	216	S	187
34	Ndc80	Inter	NUF2	K	299	NDC80	T	468		34	Ndc80	Intra	SPC25	K	148	K	203
35	Ndc80	Inter	NUF2	K	299	NDC80	K	462		35	Ndc80	Intra	SPC25	K	216	S	185
36	Ndc80	Inter	NUF2	K	266	NDC80	K	382		36	Ndc80	Intra	SPC25	K	203	Y	223
37	Ndc80	Inter	NUF2	K	252	NDC80	S	362		37	Ndc80	Intra	SPC25	K	203	Y	182
38	Ndc80	Inter	NUF2	K	252	NDC80	K	360		38	Ndc80	Intra	SPC25	K	203	T	221
39	Ndc80	Inter	NUF2	K	243	NDC80	T	350		39	Ndc80	Intra	SPC25	K	203	T	219
40	Ndc80	Inter	NUF2	K	219	SPC24	K	50		40	Ndc80	Intra	SPC25	K	203	S	185
41	Ndc80	Inter	NUF2	K	213	SPC24	K	50		41	Ndc80	Intra	SPC25	K	203	K	216
42	Ndc80	Inter	NDC80	S	295	NUF2	K	165		42	Ndc80	Intra	SPC25	K	148	Y	182
43	Ndc80	Inter	NDC80	S	295	NUF2	K	400		43	Ndc80	Intra	NDC80	S	66	K	346
44	Ndc80	Inter	NDC80	S	7	SPC25	K	203		44	Ndc80	Intra	SPC25	Y	36	K	46
45	Ndc80	Inter	NDC80	S	66	SPC25	K	52		45	Ndc80	Intra	NDC80	S	62	K	577
46	Ndc80	Inter	NDC80	S	66	SPC25	K	216		46	Ndc80	Intra	NDC80	K	400	K	405
47	Ndc80	Inter	NDC80	S	66	NUF2	K	456		47	Ndc80	Intra	NDC80	K	577	T	350
48	Ndc80	Inter	NUF2	K	400	NDC80	T	572		48	Ndc80	Intra	NDC80	K	577	K	504
49	Ndc80	Inter	NDC80	K	288	NUF2	K	165		49	Ndc80	Intra	NDC80	K	577	K	360
50	Ndc80	Inter	NDC80	K	633	SPC25	K	52		50	Ndc80	Intra	NDC80	K	606	S	595
51	Ndc80	Inter	NUF2	K	461	NDC80	K	577		51	Ndc80	Intra	NDC80	K	504	S	496
52	Ndc80	Inter	NDC80	K	577	SPC25	K	216		52	Ndc80	Intra	NDC80	K	504	K	497
53	Ndc80	Inter	NUF2	S	340	SPC24	K	98		53	Ndc80	Intra	NDC80	K	633	K	629
54	Ndc80	Inter	NUF2	K	461	SPC25	S	48		54	Ndc80	Intra	NDC80	K	478	K	577
55	Ndc80	Inter	NUF2	K	461	SPC25	K	52		55	Ndc80	Intra	NDC80	K	427	K	440
56	Ndc80	Inter	NUF2	K	461	SPC25	K	46		56	Ndc80	Intra	NDC80	K	423	K	417
57	Ndc80	Inter	NUF2	K	461	SPC24	K	50		57	Ndc80	Intra	NDC80	K	400	Y	415
58	Ndc80	Inter	NDC80	K	577	SPC25	{	1		58	Ndc80	Intra	NDC80	S	295	K	288
59	Ndc80	Inter	NUF2	K	461	NDC80	T	384		59	Ndc80	Intra	NDC80	K	427	K	452
60	Ndc80	Inter	NUF2	K	456	SPC25	Y	36		60	Ndc80	Intra	NDC80	K	382	K	393
61	Ndc80	Inter	NDC80	K	629	SPC25	K	52		61	Ndc80	Intra	NDC80	K	360	K	360
62	Ndc80	Inter	NUF2	K	456	SPC25	T	35		62	Ndc80	Intra	NDC80	K	346	K	360
63	Ndc80	Inter	NUF2	K	456	SPC25	K	46		63	Ndc80	Intra	NDC80	K	385	T	350
64	Ndc80	Inter	NUF2	K	456	SPC25	K	41		64	Ndc80	Intra	NDC80	K	385	K	385
65	Ndc80	Inter	NUF2	K	456	SPC25	K	37		65	Ndc80	Intra	NDC80	S	432	K	452
66	Ndc80	Inter	NUF2	K	456	SPC25	K	21		66	Ndc80	Intra	NDC80	K	346	S	362
67	Ndc80	Inter	NUF2	K	456	SPC24	K	50		67	Ndc80	Intra	SPC25	K	203	T	221
68	Ndc80	Inter	NDC80	K	606	SPC25	K	21		68	Ndc80	Intra	SPC25	K	203	Y	223
69	Ndc80	Inter	NDC80	K	629	SPC25	K	41		69	Ndc80	Intra	SPC25	T	204	K	216
70	Ndc80	Inter	NUF2	K	400	NDC80	Y	564		70	Ndc80	Intra	SPC25	S	208	K	216
										71	Ndc80	Intra	SPC25	K	216	S	185
										72	Ndc80	Intra	SPC25	K	216	S	187

## Sheet: Supplementary FIle 1d
Dataset			XL_id	XL_id_2	Protein1		Pos1	Protein2		Pos2	Peptide_1	From_to_1	Peptide_2	From_to_2	Score	FDR	Deviation	Rank1	File_name	Scan number
Ska	1	Inter	ska1_sorthis_K_21:ska2_K_54	ska1_sorthis_17-22:ska2_49-56	ska1_sorthis	K	21	ska2	K	54	IGNIKK	17-22	ELSVIKSR	49-56	34	0.017094017094017096	2655496606721330	TRUE	SKA123_F07.zhrm.csv	20171201_Q3_U3_1-10_AB_SA_PJH_20171117_SKA123_F7_XL-p.8562.8562.3 File:"20171201_Q3_U3_1-10_AB_SA_PJH_20171117_SKA123_F7_XL-p.raw", NativeID:"controllerType=0 controllerNumber=1 scan=8562"
Ska	2	Inter	ska1_sorthis_K_22:ska2_K_48	ska1_sorthis_22-27:ska2_42-54	ska1_sorthis	K	22	ska2	K	48	KTLSLR	22-27	NPVTLLKELSVIK	42-54	96	0.0	1970772358428630	TRUE	SKA123_F07.zhrm.csv	20171201_Q3_U3_1-10_AB_SA_PJH_20171117_SKA123_F7_XL-p.21656.21656.4 File:"20171201_Q3_U3_1-10_AB_SA_PJH_20171117_SKA123_F7_XL-p.raw", NativeID:"controllerType=0 controllerNumber=1 scan=21656"
Ska	3	Inter	ska1_sorthis_K_22:ska2_K_54	ska1_sorthis_22-27:ska2_49-56	ska1_sorthis	K	22	ska2	K	54	KTLSLR	22-27	ELSVIKSR	49-56	117	0.0	2.45749e+16	TRUE	SKA123_F05.zhrm.csv	20171201_Q3_U3_1-10_AB_SA_PJH_20171117_SKA123_F5_XL-p.10912.10912.3 File:"20171201_Q3_U3_1-10_AB_SA_PJH_20171117_SKA123_F5_XL-p.raw", NativeID:"controllerType=0 controllerNumber=1 scan=10912"
Ska	4	Inter	ska1_sorthis_K_21:ska3_K_10	ska1_sorthis_17-22:ska3_6-12	ska1_sorthis	K	21	ska3	K	10	IGNIKK	17-22	SFBGKLR	6-12	84	0.0	1.8148e+16	TRUE	SKA123_F06.zhrm.csv	20171201_Q3_U3_1-2_AB_SA_PJH_20171117_SKA123_F6_XL-p.8805.8805.4 File:"20171201_Q3_U3_1-2_AB_SA_PJH_20171117_SKA123_F6_XL-p.raw", NativeID:"controllerType=0 controllerNumber=1 scan=8805"
Ska	5	Inter	ska1_sorthis_K_21:ska3_S_13	ska1_sorthis_17-22:ska3_13-24	ska1_sorthis	K	21	ska3	S	13	IGNIKK	17-22	SLASTLDBETAR	13-24	113	0.0	3044786560625260	TRUE	SKA123_F08.zhrm.csv	20171201_Q3_U3_1-2_AB_SA_PJH_20171117_SKA123_F8_XL-p.10579.10579.3 File:"20171201_Q3_U3_1-2_AB_SA_PJH_20171117_SKA123_F8_XL-p.raw", NativeID:"controllerType=0 controllerNumber=1 scan=10579"
Ska	6	Inter	ska1_sorthis_K_21:ska3_S_16	ska1_sorthis_17-22:ska3_13-24	ska1_sorthis	K	21	ska3	S	16	IGNIKK	17-22	SLASTLDBETAR	13-24	104	0.0	2.02903e+16	TRUE	SKA123_F07.zhrm.csv	20171201_Q3_U3_1-10_AB_SA_PJH_20171117_SKA123_F7_XL-p.9007.9007.4 File:"20171201_Q3_U3_1-10_AB_SA_PJH_20171117_SKA123_F7_XL-p.raw", NativeID:"controllerType=0 controllerNumber=1 scan=9007"
Ska	7	Inter	ska1_sorthis_K_21:ska3_T_22	ska1_sorthis_17-22:ska3_13-24	ska1_sorthis	K	21	ska3	T	22	IGNIKK	17-22	SLASTLDBETAR	13-24	54	0.0	2.87851e+16	TRUE	SKA123_F06.zhrm.csv	20171201_Q3_U3_1-2_AB_SA_PJH_20171117_SKA123_F6_XL-p.11209.11209.3 File:"20171201_Q3_U3_1-2_AB_SA_PJH_20171117_SKA123_F6_XL-p.raw", NativeID:"controllerType=0 controllerNumber=1 scan=11209"
Ska	8	Inter	ska1_sorthis_K_21:ska3_S_169	ska1_sorthis_17-27:ska3_166-183	ska1_sorthis	K	21	ska3	S	169	IGNIKKTLSLR	17-27	YIVSQVLPNPPQAVNNYK	166-183	20	0.04901960784313725	2060597981007480	TRUE	SKA123_F07.zhrm.csv	20171201_Q3_U3_1-10_AB_SA_PJH_20171117_SKA123_F7_XL-p.17535.17535.3 File:"20171201_Q3_U3_1-10_AB_SA_PJH_20171117_SKA123_F7_XL-p.raw", NativeID:"controllerType=0 controllerNumber=1 scan=17535"
Ska	9	Inter	ska1_sorthis_K_21:ska3_K_247	ska1_sorthis_17-22:ska3_245-257	ska1_sorthis	K	21	ska3	K	247	IGNIKK	17-22	NNKSEEAIDTESR	245-257	69	0.0	2.21025e+16	TRUE	SKA123_F06.zhrm.csv	20171201_Q3_U3_1-2_AB_SA_PJH_20171117_SKA123_F6_XL-p.7514.7514.3 File:"20171201_Q3_U3_1-2_AB_SA_PJH_20171117_SKA123_F6_XL-p.raw", NativeID:"controllerType=0 controllerNumber=1 scan=7514"
Ska	10	Inter	ska1_sorthis_K_21:ska3_K_399	ska1_sorthis_17-22:ska3_397-405	ska1_sorthis	K	21	ska3	K	399	IGNIKK	17-22	FLKHGQNIR	397-405	33	0.016528925619834708	0.4462992922406259	TRUE	SKA123_F07.zhrm.csv	20171201_Q3_U3_1-10_AB_SA_PJH_20171117_SKA123_F7_XL-p.5694.5694.4 File:"20171201_Q3_U3_1-10_AB_SA_PJH_20171117_SKA123_F7_XL-p.raw", NativeID:"controllerType=0 controllerNumber=1 scan=5694"
Ska	11	Inter	ska1_sorthis_K_21:ska3_K_410	ska1_sorthis_17-22:ska3_406-413	ska1_sorthis	K	21	ska3	K	410	IGNIKK	17-22	DVSNKEN	406-413	28	0.01910828025477707	18181117379664	TRUE	SKA123_F07.zhrm.csv	20171201_Q3_U3_1-10_AB_SA_PJH_20171117_SKA123_F7_XL-p.5716.5716.3 File:"20171201_Q3_U3_1-10_AB_SA_PJH_20171117_SKA123_F7_XL-p.raw", NativeID:"controllerType=0 controllerNumber=1 scan=5716"
Ska	12	Inter	ska1_sorthis_K_22:ska3_K_10	ska1_sorthis_22-27:ska3_6-12	ska1_sorthis	K	22	ska3	K	10	KTLSLR	22-27	SFBGKLR	6-12	57	0.0	3.64718e+16	TRUE	SKA123_F06.zhrm.csv	20171201_Q3_U3_1-2_AB_SA_PJH_20171117_SKA123_F6_XL-p.11300.11300.3 File:"20171201_Q3_U3_1-2_AB_SA_PJH_20171117_SKA123_F6_XL-p.raw", NativeID:"controllerType=0 controllerNumber=1 scan=11300"
Ska	13	Inter	ska1_sorthis_K_22:ska3_Y_39	ska1_sorthis_22-27:ska3_28-42	ska1_sorthis	K	22	ska3	Y	39	KTLSLR	22-27	ALDGEESDFEDYPMR	28-42	100	0.0	2925311786446450	TRUE	SKA123_F07.zhrm.csv	20171201_Q3_U3_1-10_AB_SA_PJH_20171117_SKA123_F7_XL-p.16345.16345.4 File:"20171201_Q3_U3_1-10_AB_SA_PJH_20171117_SKA123_F7_XL-p.raw", NativeID:"controllerType=0 controllerNumber=1 scan=16345"
Ska	14	Inter	ska1_sorthis_K_22:ska3_K_247	ska1_sorthis_22-27:ska3_245-257	ska1_sorthis	K	22	ska3	K	247	KTLSLR	22-27	NNKSEEAIDTESR	245-257	71	0.0	1.59733e+16	TRUE	SKA123_F07.zhrm.csv	20171201_Q3_U3_1-10_AB_SA_PJH_20171117_SKA123_F7_XL-p.8806.8806.4 File:"20171201_Q3_U3_1-10_AB_SA_PJH_20171117_SKA123_F7_XL-p.raw", NativeID:"controllerType=0 controllerNumber=1 scan=8806"
Ska	15	Inter	ska1_sorthis_K_22:ska3_K_399	ska1_sorthis_22-27:ska3_397-405	ska1_sorthis	K	22	ska3	K	399	KTLSLR	22-27	FLKHGQNIR	397-405	101	0.0	1.9535e+16	TRUE	SKA123_F06.zhrm.csv	20171201_Q3_U3_1-2_AB_SA_PJH_20171117_SKA123_F6_XL-p.8634.8634.4 File:"20171201_Q3_U3_1-2_AB_SA_PJH_20171117_SKA123_F6_XL-p.raw", NativeID:"controllerType=0 controllerNumber=1 scan=8634"
Ska	16	Inter	ska1_sorthis_K_22:ska3_S_408	ska1_sorthis_22-27:ska3_406-413	ska1_sorthis	K	22	ska3	S	408	KTLSLR	22-27	DVSNKEN	406-413	46	0.0	2.40243e+16	TRUE	SKA123_F05.zhrm.csv	20171201_Q3_U3_1-10_AB_SA_PJH_20171117_SKA123_F5_XL-p.8852.8852.3 File:"20171201_Q3_U3_1-10_AB_SA_PJH_20171117_SKA123_F5_XL-p.raw", NativeID:"controllerType=0 controllerNumber=1 scan=8852"
Ska	17	Inter	ska1_sorthis_K_22:ska3_K_410	ska1_sorthis_22-27:ska3_406-413	ska1_sorthis	K	22	ska3	K	410	KTLSLR	22-27	DVSNKEN	406-413	60	0.0	2.34355e+16	TRUE	SKA123_F07.zhrm.csv	20171201_Q3_U3_1-10_AB_SA_PJH_20171117_SKA123_F7_XL-p.8906.8906.3 File:"20171201_Q3_U3_1-10_AB_SA_PJH_20171117_SKA123_F7_XL-p.raw", NativeID:"controllerType=0 controllerNumber=1 scan=8906"
Ska	18	Inter	ska1_sorthis_T_34:ska3_K_247	ska1_sorthis_28-36:ska3_245-257	ska1_sorthis	T	34	ska3	K	247	NBGQEPTLK	28-36	NNKSEEAIDTESR	245-257	26	0.017341040462427744	1428729033529200	TRUE	SKA123_F07.zhrm.csv	20171201_Q3_U3_1-10_AB_SA_PJH_20171117_SKA123_F7_XL-p.8430.8430.3 File:"20171201_Q3_U3_1-10_AB_SA_PJH_20171117_SKA123_F7_XL-p.raw", NativeID:"controllerType=0 controllerNumber=1 scan=8430"
Ska	19	Inter	ska1_sorthis_S_174:ska3_K_399	ska1_sorthis_167-175:ska3_397-405	ska1_sorthis	S	174	ska3	K	399	EINKAVISK	167-175	FLKHGQNIR	397-405	26	0.03614457831325301	3581924723558520	TRUE	SKA123_F06.zhrm.csv	20171201_Q3_U3_1-2_AB_SA_PJH_20171117_SKA123_F6_XL-p.8738.8738.3 File:"20171201_Q3_U3_1-2_AB_SA_PJH_20171117_SKA123_F6_XL-p.raw", NativeID:"controllerType=0 controllerNumber=1 scan=8738"
Ska	20	Inter	ska1_sorthis_K_184:ska3_K_247	ska1_sorthis_184-191:ska3_245-257	ska1_sorthis	K	184	ska3	K	247	KSMNSVTR	184-191	NNKSEEAIDTESR	245-257	21	0.03535353535353535	1.33631e+16	TRUE	SKA123_F07.zhrm.csv	20171201_Q3_U3_1-10_AB_SA_PJH_20171117_SKA123_F7_XL-p.6433.6433.3 File:"20171201_Q3_U3_1-10_AB_SA_PJH_20171117_SKA123_F7_XL-p.raw", NativeID:"controllerType=0 controllerNumber=1 scan=6433"
Ska	21	Inter	ska1_sorthis_S_188:ska3_K_247	ska1_sorthis_184-191:ska3_245-257	ska1_sorthis	S	188	ska3	K	247	KSMNSVTR	184-191	NNKSEEAIDTESR	245-257	25	0.03428571428571429	2037791267310620	TRUE	SKA123_F06.zhrm.csv	20171201_Q3_U3_1-2_AB_SA_PJH_20171117_SKA123_F6_XL-p.7441.7441.3 File:"20171201_Q3_U3_1-2_AB_SA_PJH_20171117_SKA123_F6_XL-p.raw", NativeID:"controllerType=0 controllerNumber=1 scan=7441"
Ska	22	Inter	ska1_sorthis_Y_194:ska3_K_92	ska1_sorthis_192-196:ska3_86-94	ska1_sorthis	Y	194	ska3	K	92	NLYHR	192-196	NSMDIMKIR	86-94	30	0.02127659574468085	3.34041e+16	TRUE	SKA123_F06.zhrm.csv	20171201_Q3_U3_1-2_AB_SA_PJH_20171117_SKA123_F6_XL-p.11854.11854.3 File:"20171201_Q3_U3_1-2_AB_SA_PJH_20171117_SKA123_F6_XL-p.raw", NativeID:"controllerType=0 controllerNumber=1 scan=11854"
Ska	23	Inter	ska1_sorthis_Y_194:ska3_K_247	ska1_sorthis_192-196:ska3_245-257	ska1_sorthis	Y	194	ska3	K	247	NLYHR	192-196	NNKSEEAIDTESR	245-257	28	0.025974025974025976	2.59391e+16	TRUE	SKA123_F06.zhrm.csv	20171201_Q3_U3_1-2_AB_SA_PJH_20171117_SKA123_F6_XL-p.7535.7535.4 File:"20171201_Q3_U3_1-2_AB_SA_PJH_20171117_SKA123_F6_XL-p.raw", NativeID:"controllerType=0 controllerNumber=1 scan=7535"
Ska	24	Inter	ska1_sorthis_Y_194:ska3_K_399	ska1_sorthis_192-196:ska3_397-405	ska1_sorthis	Y	194	ska3	K	399	NLYHR	192-196	FLKHGQNIR	397-405	16	0.03614457831325301	1.24554e+16	TRUE	SKA123_F05.zhrm.csv	20171201_Q3_U3_1-10_AB_SA_PJH_20171117_SKA123_F5_XL-p.6293.6293.3 File:"20171201_Q3_U3_1-10_AB_SA_PJH_20171117_SKA123_F5_XL-p.raw", NativeID:"controllerType=0 controllerNumber=1 scan=6293"
Ska	25	Inter	ska1_sorthis_Y_194:ska3_K_410	ska1_sorthis_192-196:ska3_406-413	ska1_sorthis	Y	194	ska3	K	410	NLYHR	192-196	DVSNKEN	406-413	24	0.0	1.85044e+16	TRUE	SKA123_F05.zhrm.csv	20171201_Q3_U3_1-10_AB_SA_PJH_20171117_SKA123_F5_XL-p.6191.6191.3 File:"20171201_Q3_U3_1-10_AB_SA_PJH_20171117_SKA123_F5_XL-p.raw", NativeID:"controllerType=0 controllerNumber=1 scan=6191"
Ska	26	Inter	ska1_sorthis_T_202:ska3_K_247	ska1_sorthis_197-206:ska3_245-257	ska1_sorthis	T	202	ska3	K	247	FIDEETKDTK	197-206	NNKSEEAIDTESR	245-257	45	0.0	2.12263e+16	TRUE	SKA123_F07.zhrm.csv	20171201_Q3_U3_1-10_AB_SA_PJH_20171117_SKA123_F7_XL-p.8313.8313.3 File:"20171201_Q3_U3_1-10_AB_SA_PJH_20171117_SKA123_F7_XL-p.raw", NativeID:"controllerType=0 controllerNumber=1 scan=8313"
Ska	27	Inter	ska1_sorthis_T_205:ska3_K_10	ska1_sorthis_204-208:ska3_6-12	ska1_sorthis	T	205	ska3	K	10	DTKGR	204-208	SFBGKLR	6-12	64	0.0	3.30546e+16	TRUE	SKA123_F05.zhrm.csv	20171201_Q3_U3_1-10_AB_SA_PJH_20171117_SKA123_F5_XL-p.6460.6460.3 File:"20171201_Q3_U3_1-10_AB_SA_PJH_20171117_SKA123_F5_XL-p.raw", NativeID:"controllerType=0 controllerNumber=1 scan=6460"
Ska	28	Inter	ska1_sorthis_T_205:ska3_K_247	ska1_sorthis_204-208:ska3_245-257	ska1_sorthis	T	205	ska3	K	247	DTKGR	204-208	NNKSEEAIDTESR	245-257	34	0.017094017094017096	1.61947e+16	TRUE	SKA123_F07.zhrm.csv	20171201_Q3_U3_1-10_AB_SA_PJH_20171117_SKA123_F7_XL-p.4806.4806.3 File:"20171201_Q3_U3_1-10_AB_SA_PJH_20171117_SKA123_F7_XL-p.raw", NativeID:"controllerType=0 controllerNumber=1 scan=4806"
Ska	29	Inter	ska1_sorthis_T_205:ska3_K_399	ska1_sorthis_204-208:ska3_397-405	ska1_sorthis	T	205	ska3	K	399	DTKGR	204-208	FLKHGQNIR	397-405	46	0.0	1.38853e+16	TRUE	SKA123_F06.zhrm.csv	20171201_Q3_U3_1-2_AB_SA_PJH_20171117_SKA123_F6_XL-p.5703.5703.3 File:"20171201_Q3_U3_1-2_AB_SA_PJH_20171117_SKA123_F6_XL-p.raw", NativeID:"controllerType=0 controllerNumber=1 scan=5703"
Ska	30	Inter	ska1_sorthis_K_206:ska3_S_6	ska1_sorthis_204-208:ska3_6-10	ska1_sorthis	K	206	ska3	S	6	DTKGR	204-208	SFBGK	6-10	97	0.0	4211355898014150	TRUE	SKA123_F06.zhrm.csv	20171201_Q3_U3_1-2_AB_SA_PJH_20171117_SKA123_F6_XL-p.5857.5857.3 File:"20171201_Q3_U3_1-2_AB_SA_PJH_20171117_SKA123_F6_XL-p.raw", NativeID:"controllerType=0 controllerNumber=1 scan=5857"
Ska	31	Inter	ska1_sorthis_K_206:ska3_K_10	ska1_sorthis_204-208:ska3_6-12	ska1_sorthis	K	206	ska3	K	10	DTKGR	204-208	SFBGKLR	6-12	51	0.0	2286889440869390	TRUE	SKA123_F06.zhrm.csv	20171201_Q3_U3_1-2_AB_SA_PJH_20171117_SKA123_F6_XL-p.7135.7135.4 File:"20171201_Q3_U3_1-2_AB_SA_PJH_20171117_SKA123_F6_XL-p.raw", NativeID:"controllerType=0 controllerNumber=1 scan=7135"
Ska	32	Inter	ska1_sorthis_K_206:ska3_K_64	ska1_sorthis_204-208:ska3_56-66	ska1_sorthis	K	206	ska3	K	64	DTKGR	204-208	DDINILLDKAR	56-66	58	0.0	1794427089703690	TRUE	SKA123_F07.zhrm.csv	20171201_Q3_U3_1-10_AB_SA_PJH_20171117_SKA123_F7_XL-p.16190.16190.4 File:"20171201_Q3_U3_1-10_AB_SA_PJH_20171117_SKA123_F7_XL-p.raw", NativeID:"controllerType=0 controllerNumber=1 scan=16190"
Ska	33	Inter	ska1_sorthis_K_206:ska3_K_99	ska1_sorthis_204-208:ska3_95-105	ska1_sorthis	K	206	ska3	K	99	DTKGR	204-208	EYFQKYGYSPR	95-105	57	0.0	3.37707e+16	TRUE	SKA123_F06.zhrm.csv	20171201_Q3_U3_1-2_AB_SA_PJH_20171117_SKA123_F6_XL-p.10986.10986.3 File:"20171201_Q3_U3_1-2_AB_SA_PJH_20171117_SKA123_F6_XL-p.raw", NativeID:"controllerType=0 controllerNumber=1 scan=10986"
Ska	34	Inter	ska1_sorthis_K_206:ska3_Y_100	ska1_sorthis_204-208:ska3_95-105	ska1_sorthis	K	206	ska3	Y	100	DTKGR	204-208	EYFQKYGYSPR	95-105	16	0.03614457831325301	36738945633102	TRUE	SKA123_F05.zhrm.csv	20171201_Q3_U3_1-10_AB_SA_PJH_20171117_SKA123_F5_XL-p.9881.9881.3 File:"20171201_Q3_U3_1-10_AB_SA_PJH_20171117_SKA123_F5_XL-p.raw", NativeID:"controllerType=0 controllerNumber=1 scan=9881"
Ska	35	Inter	ska1_sorthis_K_206:ska3_K_247	ska1_sorthis_204-208:ska3_245-257	ska1_sorthis	K	206	ska3	K	247	DTKGR	204-208	NNKSEEAIDTESR	245-257	47	0.0	4.38912e+16	TRUE	SKA123_F06.zhrm.csv	20171201_Q3_U3_1-2_AB_SA_PJH_20171117_SKA123_F6_XL-p.5856.5856.4 File:"20171201_Q3_U3_1-2_AB_SA_PJH_20171117_SKA123_F6_XL-p.raw", NativeID:"controllerType=0 controllerNumber=1 scan=5856"
Ska	36	Inter	ska1_sorthis_K_206:ska3_S_408	ska1_sorthis_204-208:ska3_406-413	ska1_sorthis	K	206	ska3	S	408	DTKGR	204-208	DVSNKEN	406-413	35	0.0	0.5579363096791948	TRUE	SKA123_F05.zhrm.csv	20171201_Q3_U3_1-10_AB_SA_PJH_20171117_SKA123_F5_XL-p.3560.3560.3 File:"20171201_Q3_U3_1-10_AB_SA_PJH_20171117_SKA123_F5_XL-p.raw", NativeID:"controllerType=0 controllerNumber=1 scan=3560"
Ska	37	Inter	ska1_sorthis_S_242:ska3_K_99	ska1_sorthis_241-245:ska3_95-105	ska1_sorthis	S	242	ska3	K	99	LSEVR	241-245	EYFQKYGYSPR	95-105	47	0.0	1.6858e+16	TRUE	SKA123_F06.zhrm.csv	20171201_Q3_U3_1-2_AB_SA_PJH_20171117_SKA123_F6_XL-p.12097.12097.4 File:"20171201_Q3_U3_1-2_AB_SA_PJH_20171117_SKA123_F6_XL-p.raw", NativeID:"controllerType=0 controllerNumber=1 scan=12097"
Ska	38	Inter	ska1_sorthis_S_242:ska3_K_247	ska1_sorthis_241-245:ska3_245-257	ska1_sorthis	S	242	ska3	K	247	LSEVR	241-245	NNKSEEAIDTESR	245-257	61	0.0	1838964722528390	TRUE	SKA123_F07.zhrm.csv	20171201_Q3_U3_1-10_AB_SA_PJH_20171117_SKA123_F7_XL-p.6366.6366.3 File:"20171201_Q3_U3_1-10_AB_SA_PJH_20171117_SKA123_F7_XL-p.raw", NativeID:"controllerType=0 controllerNumber=1 scan=6366"
Ska	39	Inter	ska1_sorthis_S_242:ska3_K_399	ska1_sorthis_241-245:ska3_397-405	ska1_sorthis	S	242	ska3	K	399	LSEVR	241-245	FLKHGQNIR	397-405	54	0.0	0.2439174518172055	TRUE	SKA123_F06.zhrm.csv	20171201_Q3_U3_1-2_AB_SA_PJH_20171117_SKA123_F6_XL-p.6604.6604.3 File:"20171201_Q3_U3_1-2_AB_SA_PJH_20171117_SKA123_F6_XL-p.raw", NativeID:"controllerType=0 controllerNumber=1 scan=6604"
Ska	40	Inter	ska1_sorthis_T_250:ska3_K_247	ska1_sorthis_246-251:ska3_245-257	ska1_sorthis	T	250	ska3	K	247	GGGLTR	246-251	NNKSEEAIDTESR	245-257	31	0.014492753623188406	2507658023387130	TRUE	SKA123_F07.zhrm.csv	20171201_Q3_U3_1-10_AB_SA_PJH_20171117_SKA123_F7_XL-p.7575.7575.3 File:"20171201_Q3_U3_1-10_AB_SA_PJH_20171117_SKA123_F7_XL-p.raw", NativeID:"controllerType=0 controllerNumber=1 scan=7575"
Ska	41	Inter	ska1_sorthis_T_250:ska3_K_399	ska1_sorthis_246-251:ska3_397-405	ska1_sorthis	T	250	ska3	K	399	GGGLTR	246-251	FLKHGQNIR	397-405	23	0.042328042328042326	2984201790009010	TRUE	SKA123_F06.zhrm.csv	20171201_Q3_U3_1-2_AB_SA_PJH_20171117_SKA123_F6_XL-p.6422.6422.3 File:"20171201_Q3_U3_1-2_AB_SA_PJH_20171117_SKA123_F6_XL-p.raw", NativeID:"controllerType=0 controllerNumber=1 scan=6422"
Ska	42	Inter	ska2_K_65:ska1_sorthis_K_217	ska2_64-72:ska1_sorthis_209-223	ska2	K	65	ska1_sorthis	K	217	FKPVAVEQK	64-72	YFIVEADIKEFTTLK	209-223	80	0.0	4946776747939070	TRUE	SKA123_F08.zhrm.csv	20171201_Q3_U3_1-2_AB_SA_PJH_20171117_SKA123_F8_XL-p.19463.19463.4 File:"20171201_Q3_U3_1-2_AB_SA_PJH_20171117_SKA123_F8_XL-p.raw", NativeID:"controllerType=0 controllerNumber=1 scan=19463"
Ska	43	Inter	ska2_T_32:ska3_K_92	ska2_32-41:ska3_86-94	ska2	T	32	ska3	K	92	TNHPDSASEK	32-41	NSMDIMKIR	86-94	23	0.026881720430107527	1.77942e+16	TRUE	SKA123_F07.zhrm.csv	20171201_Q3_U3_1-10_AB_SA_PJH_20171117_SKA123_F7_XL-p.15417.15417.4 File:"20171201_Q3_U3_1-10_AB_SA_PJH_20171117_SKA123_F7_XL-p.raw", NativeID:"controllerType=0 controllerNumber=1 scan=15417"
Ska	44	Inter	ska2_K_48:ska3_K_247	ska2_42-54:ska3_245-257	ska2	K	48	ska3	K	247	NPVTLLKELSVIK	42-54	NNKSEEAIDTESR	245-257	36	0.017699115044247787	3819830850731920	TRUE	SKA123_F07.zhrm.csv	20171201_Q3_U3_1-10_AB_SA_PJH_20171117_SKA123_F7_XL-p.20755.20755.4 File:"20171201_Q3_U3_1-10_AB_SA_PJH_20171117_SKA123_F7_XL-p.raw", NativeID:"controllerType=0 controllerNumber=1 scan=20755"
Ska	45	Inter	ska2_Y_57:ska3_K_64	ska2_57-63:ska3_56-66	ska2	Y	57	ska3	K	64	YQTLYAR	57-63	DDINILLDKAR	56-66	66	0.0	1822720342522720	TRUE	SKA123_F07.zhrm.csv	20171201_Q3_U3_1-10_AB_SA_PJH_20171117_SKA123_F7_XL-p.18931.18931.3 File:"20171201_Q3_U3_1-10_AB_SA_PJH_20171117_SKA123_F7_XL-p.raw", NativeID:"controllerType=0 controllerNumber=1 scan=18931"
Ska	46	Inter	ska2_T_59:ska3_K_64	ska2_57-63:ska3_56-66	ska2	T	59	ska3	K	64	YQTLYAR	57-63	DDINILLDKAR	56-66	90	0.0	3.6951e+16	TRUE	SKA123_F06.zhrm.csv	20171201_Q3_U3_1-2_AB_SA_PJH_20171117_SKA123_F6_XL-p.19281.19281.4 File:"20171201_Q3_U3_1-2_AB_SA_PJH_20171117_SKA123_F6_XL-p.raw", NativeID:"controllerType=0 controllerNumber=1 scan=19281"
Ska	47	Inter	ska2_T_59:ska3_K_399	ska2_57-63:ska3_397-405	ska2	T	59	ska3	K	399	YQTLYAR	57-63	FLKHGQNIR	397-405	25	0.03428571428571429	2.5783e+16	TRUE	SKA123_F06.zhrm.csv	20171201_Q3_U3_1-2_AB_SA_PJH_20171117_SKA123_F6_XL-p.9258.9258.4 File:"20171201_Q3_U3_1-2_AB_SA_PJH_20171117_SKA123_F6_XL-p.raw", NativeID:"controllerType=0 controllerNumber=1 scan=9258"
Ska	48	Inter	ska2_Y_61:ska3_K_64	ska2_57-63:ska3_56-66	ska2	Y	61	ska3	K	64	YQTLYAR	57-63	DDINILLDKAR	56-66	102	0.0	3.67752e+16	TRUE	SKA123_F07.zhrm.csv	20171201_Q3_U3_1-10_AB_SA_PJH_20171117_SKA123_F7_XL-p.19068.19068.3 File:"20171201_Q3_U3_1-10_AB_SA_PJH_20171117_SKA123_F7_XL-p.raw", NativeID:"controllerType=0 controllerNumber=1 scan=19068"
Ska	49	Inter	ska2_Y_61:ska3_K_399	ska2_57-63:ska3_397-405	ska2	Y	61	ska3	K	399	YQTLYAR	57-63	FLKHGQNIR	397-405	24	0.044198895027624314	1.95101e+16	TRUE	SKA123_F06.zhrm.csv	20171201_Q3_U3_1-2_AB_SA_PJH_20171117_SKA123_F6_XL-p.9084.9084.3 File:"20171201_Q3_U3_1-2_AB_SA_PJH_20171117_SKA123_F6_XL-p.raw", NativeID:"controllerType=0 controllerNumber=1 scan=9084"
Ska	50	Inter	ska2_K_65:ska3_K_64	ska2_64-72:ska3_56-66	ska2	K	65	ska3	K	64	FKPVAVEQK	64-72	DDINILLDKAR	56-66	134	0.0	4637606840200720	TRUE	SKA123_F08.zhrm.csv	20171201_Q3_U3_1-2_AB_SA_PJH_20171117_SKA123_F8_XL-p.15829.15829.3 File:"20171201_Q3_U3_1-2_AB_SA_PJH_20171117_SKA123_F8_XL-p.raw", NativeID:"controllerType=0 controllerNumber=1 scan=15829"
Ska	51	Inter	ska2_K_65:ska3_K_247	ska2_64-72:ska3_245-257	ska2	K	65	ska3	K	247	FKPVAVEQK	64-72	NNKSEEAIDTESR	245-257	31	0.021897810218978103	3.68676e+16	TRUE	SKA123_F06.zhrm.csv	20171201_Q3_U3_1-2_AB_SA_PJH_20171117_SKA123_F6_XL-p.9728.9728.3 File:"20171201_Q3_U3_1-2_AB_SA_PJH_20171117_SKA123_F6_XL-p.raw", NativeID:"controllerType=0 controllerNumber=1 scan=9728"
Ska	52	Inter	ska2_K_65:ska3_K_399	ska2_64-72:ska3_397-405	ska2	K	65	ska3	K	399	FKPVAVEQK	64-72	FLKHGQNIR	397-405	32	0.015384615384615384	2216983638434330	TRUE	SKA123_F06.zhrm.csv	20171201_Q3_U3_1-2_AB_SA_PJH_20171117_SKA123_F6_XL-p.8630.8630.3 File:"20171201_Q3_U3_1-2_AB_SA_PJH_20171117_SKA123_F6_XL-p.raw", NativeID:"controllerType=0 controllerNumber=1 scan=8630"
Ska	53	Inter	ska2_S_74:ska3_K_64	ska2_73-77:ska3_56-66	ska2	S	74	ska3	K	64	ESKSR	73-77	DDINILLDKAR	56-66	70	0.0	3964496687105620	TRUE	SKA123_F06.zhrm.csv	20171201_Q3_U3_1-2_AB_SA_PJH_20171117_SKA123_F6_XL-p.15411.15411.4 File:"20171201_Q3_U3_1-2_AB_SA_PJH_20171117_SKA123_F6_XL-p.raw", NativeID:"controllerType=0 controllerNumber=1 scan=15411"
Ska	54	Inter	ska2_K_75:ska3_K_64	ska2_73-77:ska3_56-66	ska2	K	75	ska3	K	64	ESKSR	73-77	DDINILLDKAR	56-66	100	0.0	298402290146206	TRUE	SKA123_F05.zhrm.csv	20171201_Q3_U3_1-10_AB_SA_PJH_20171117_SKA123_F5_XL-p.13466.13466.4 File:"20171201_Q3_U3_1-10_AB_SA_PJH_20171117_SKA123_F5_XL-p.raw", NativeID:"controllerType=0 controllerNumber=1 scan=13466"
Ska	55	Inter	ska2_K_84:ska3_Y_45	ska2_84-94:ska3_43-55	ska2	K	84	ska3	Y	45	KTMNMIQKLQK	84-94	ILYDLHSEVQTLK	43-55	21	0.03535353535353535	3831120451268700	TRUE	SKA123_F07.zhrm.csv	20171201_Q3_U3_1-10_AB_SA_PJH_20171117_SKA123_F7_XL-p.13575.13575.3 File:"20171201_Q3_U3_1-10_AB_SA_PJH_20171117_SKA123_F7_XL-p.raw", NativeID:"controllerType=0 controllerNumber=1 scan=13575"
Ska	56	Inter	ska2_T_85:ska3_K_99	ska2_84-91:ska3_95-105	ska2	T	85	ska3	K	99	KTMNMIQK	84-91	EYFQKYGYSPR	95-105	28	0.025974025974025976	2.51611e+16	TRUE	SKA123_F06.zhrm.csv	20171201_Q3_U3_1-2_AB_SA_PJH_20171117_SKA123_F6_XL-p.16863.16863.3 File:"20171201_Q3_U3_1-2_AB_SA_PJH_20171117_SKA123_F6_XL-p.raw", NativeID:"controllerType=0 controllerNumber=1 scan=16863"
Ska	57	Inter	ska3_S_6:ska1_sorthis_K_21	ska3_6-10:ska1_sorthis_17-22	ska3	S	6	ska1_sorthis	K	21	SFBGK	6-10	IGNIKK	17-22	119	0.0	0.2451521628256577	TRUE	SKA123_F07.zhrm.csv	20171201_Q3_U3_1-10_AB_SA_PJH_20171117_SKA123_F7_XL-p.7213.7213.3 File:"20171201_Q3_U3_1-10_AB_SA_PJH_20171117_SKA123_F7_XL-p.raw", NativeID:"controllerType=0 controllerNumber=1 scan=7213"
Ska	58	Inter	ska3_S_6:ska1_sorthis_K_22	ska3_6-10:ska1_sorthis_22-27	ska3	S	6	ska1_sorthis	K	22	SFBGK	6-10	KTLSLR	22-27	38	0.0	3721453449015330	TRUE	SKA123_F06.zhrm.csv	20171201_Q3_U3_1-2_AB_SA_PJH_20171117_SKA123_F6_XL-p.11292.11292.3 File:"20171201_Q3_U3_1-2_AB_SA_PJH_20171117_SKA123_F6_XL-p.raw", NativeID:"controllerType=0 controllerNumber=1 scan=11292"
Ska	59	Inter	ska3_S_6:ska1_sorthis_K_166	ska3_6-10:ska1_sorthis_156-170	ska3	S	6	ska1_sorthis	K	166	SFBGK	6-10	LTYNQINDVIKEINK	156-170	69	0.0	4152476159822240	TRUE	SKA123_F07.zhrm.csv	20171201_Q3_U3_1-10_AB_SA_PJH_20171117_SKA123_F7_XL-p.20476.20476.3 File:"20171201_Q3_U3_1-10_AB_SA_PJH_20171117_SKA123_F7_XL-p.raw", NativeID:"controllerType=0 controllerNumber=1 scan=20476"
Ska	60	Inter	ska3_K_10:ska1_sorthis_K_166	ska3_6-12:ska1_sorthis_156-170	ska3	K	10	ska1_sorthis	K	166	SFBGKLR	6-12	LTYNQINDVIKEINK	156-170	76	0.0	3280966560548090	TRUE	SKA123_F07.zhrm.csv	20171201_Q3_U3_1-10_AB_SA_PJH_20171117_SKA123_F7_XL-p.19069.19069.4 File:"20171201_Q3_U3_1-10_AB_SA_PJH_20171117_SKA123_F7_XL-p.raw", NativeID:"controllerType=0 controllerNumber=1 scan=19069"
Ska	61	Inter	ska3_K_10:ska1_sorthis_K_217	ska3_6-12:ska1_sorthis_209-223	ska3	K	10	ska1_sorthis	K	217	SFBGKLR	6-12	YFIVEADIKEFTTLK	209-223	30	0.024390243902439025	4812140182451240	TRUE	SKA123_F08.zhrm.csv	20171201_Q3_U3_1-2_AB_SA_PJH_20171117_SKA123_F8_XL-p.19443.19443.4 File:"20171201_Q3_U3_1-2_AB_SA_PJH_20171117_SKA123_F8_XL-p.raw", NativeID:"controllerType=0 controllerNumber=1 scan=19443"
Ska	62	Inter	ska3_S_13:ska1_sorthis_K_203	ska3_13-24:ska1_sorthis_197-208	ska3	S	13	ska1_sorthis	K	203	SLASTLDBETAR	13-24	FIDEETKDTKGR	197-208	24	0.0425531914893617	1238934891286770	TRUE	SKA123_F08.zhrm.csv	20171201_Q3_U3_1-2_AB_SA_PJH_20171117_SKA123_F8_XL-p.7861.7861.4 File:"20171201_Q3_U3_1-2_AB_SA_PJH_20171117_SKA123_F8_XL-p.raw", NativeID:"controllerType=0 controllerNumber=1 scan=7861"
Ska	63	Inter	ska3_S_13:ska1_sorthis_K_206	ska3_13-24:ska1_sorthis_197-208	ska3	S	13	ska1_sorthis	K	206	SLASTLDBETAR	13-24	FIDEETKDTKGR	197-208	85	0.0	2.62676e+16	TRUE	SKA123_F07.zhrm.csv	20171201_Q3_U3_1-10_AB_SA_PJH_20171117_SKA123_F7_XL-p.9891.9891.4 File:"20171201_Q3_U3_1-10_AB_SA_PJH_20171117_SKA123_F7_XL-p.raw", NativeID:"controllerType=0 controllerNumber=1 scan=9891"
Ska	64	Inter	ska3_K_64:ska1_sorthis_K_166	ska3_56-66:ska1_sorthis_156-170	ska3	K	64	ska1_sorthis	K	166	DDINILLDKAR	56-66	LTYNQINDVIKEINK	156-170	85	0.0	4473197817889950	TRUE	SKA123_F08.zhrm.csv	20171201_Q3_U3_1-2_AB_SA_PJH_20171117_SKA123_F8_XL-p.21554.21554.4 File:"20171201_Q3_U3_1-2_AB_SA_PJH_20171117_SKA123_F8_XL-p.raw", NativeID:"controllerType=0 controllerNumber=1 scan=21554"
Ska	65	Inter	ska3_K_247:ska1_sorthis_S_133	ska3_245-257:ska1_sorthis_133-153	ska3	K	247	ska1_sorthis	S	133	NNKSEEAIDTESR	245-257	SIKEMPFITBDEFNGVPSYMK	133-153	84	0.0	2.99585e+16	TRUE	SKA123_F08.zhrm.csv	20171201_Q3_U3_1-2_AB_SA_PJH_20171117_SKA123_F8_XL-p.17805.17805.4 File:"20171201_Q3_U3_1-2_AB_SA_PJH_20171117_SKA123_F8_XL-p.raw", NativeID:"controllerType=0 controllerNumber=1 scan=17805"
Ska	66	Inter	ska3_K_247:ska1_sorthis_K_166	ska3_245-257:ska1_sorthis_156-170	ska3	K	247	ska1_sorthis	K	166	NNKSEEAIDTESR	245-257	LTYNQINDVIKEINK	156-170	102	0.0	3.91199e+16	TRUE	SKA123_F07.zhrm.csv	20171201_Q3_U3_1-10_AB_SA_PJH_20171117_SKA123_F7_XL-p.18092.18092.3 File:"20171201_Q3_U3_1-10_AB_SA_PJH_20171117_SKA123_F7_XL-p.raw", NativeID:"controllerType=0 controllerNumber=1 scan=18092"
Ska	67	Inter	ska3_T_299:ska1_sorthis_K_153	ska3_296-300:ska1_sorthis_136-155	ska3	T	299	ska1_sorthis	K	153	IPSTK	296-300	EmPFITBDEFNGVPSYMKSR	136-155	21	0.0	3.28117e+16	TRUE	SKA123_F10.zhrm.csv	20171201_Q3_U3_1-2_AB_SA_PJH_20171117_SKA123_F10_XL-p.17289.17289.3 File:"20171201_Q3_U3_1-2_AB_SA_PJH_20171117_SKA123_F10_XL-p.raw", NativeID:"controllerType=0 controllerNumber=1 scan=17289"
Ska	68	Inter	ska3_K_399:ska1_sorthis_K_135	ska3_397-405:ska1_sorthis_133-153	ska3	K	399	ska1_sorthis	K	135	FLKHGQNIR	397-405	SIKEMPFITBDEFNGVPSYMK	133-153	30	0.0136986301369863	4324705496274230	TRUE	SKA123_F07.zhrm.csv	20171201_Q3_U3_1-10_AB_SA_PJH_20171117_SKA123_F7_XL-p.18518.18518.5 File:"20171201_Q3_U3_1-10_AB_SA_PJH_20171117_SKA123_F7_XL-p.raw", NativeID:"controllerType=0 controllerNumber=1 scan=18518"
Ska	69	Inter	ska3_K_399:ska1_sorthis_K_166	ska3_397-405:ska1_sorthis_156-170	ska3	K	399	ska1_sorthis	K	166	FLKHGQNIR	397-405	LTYNQINDVIKEINK	156-170	36	0.017699115044247787	3715123036897950	TRUE	SKA123_F07.zhrm.csv	20171201_Q3_U3_1-10_AB_SA_PJH_20171117_SKA123_F7_XL-p.16396.16396.3 File:"20171201_Q3_U3_1-10_AB_SA_PJH_20171117_SKA123_F7_XL-p.raw", NativeID:"controllerType=0 controllerNumber=1 scan=16396"
Ska	70	Inter	ska3_K_410:ska1_sorthis_S_133	ska3_406-413:ska1_sorthis_133-153	ska3	K	410	ska1_sorthis	S	133	DVSNKEN	406-413	SIKEMPFITBDEFNGVPSYMK	133-153	83	0.0	4.24299e+16	TRUE	SKA123_F08.zhrm.csv	20171201_Q3_U3_1-2_AB_SA_PJH_20171117_SKA123_F8_XL-p.20688.20688.4 File:"20171201_Q3_U3_1-2_AB_SA_PJH_20171117_SKA123_F8_XL-p.raw", NativeID:"controllerType=0 controllerNumber=1 scan=20688"
Ska	71	Inter	ska3_K_410:ska1_sorthis_K_166	ska3_406-413:ska1_sorthis_156-170	ska3	K	410	ska1_sorthis	K	166	DVSNKEN	406-413	LTYNQINDVIKEINK	156-170	109	0.0	4099926651487550	TRUE	SKA123_F08.zhrm.csv	20171201_Q3_U3_1-2_AB_SA_PJH_20171117_SKA123_F8_XL-p.18169.18169.3 File:"20171201_Q3_U3_1-2_AB_SA_PJH_20171117_SKA123_F8_XL-p.raw", NativeID:"controllerType=0 controllerNumber=1 scan=18169"
Ska	72	Inter	ska3_K_410:ska1_sorthis_K_170	ska3_406-413:ska1_sorthis_167-175	ska3	K	410	ska1_sorthis	K	170	DVSNKEN	406-413	EINKAVISK	167-175	29	0.013513513513513514	0.8901789437494491	TRUE	SKA123_F07.zhrm.csv	20171201_Q3_U3_1-10_AB_SA_PJH_20171117_SKA123_F7_XL-p.8869.8869.3 File:"20171201_Q3_U3_1-10_AB_SA_PJH_20171117_SKA123_F7_XL-p.raw", NativeID:"controllerType=0 controllerNumber=1 scan=8869"
Ska	73	Inter	ska3_K_410:ska1_sorthis_T_202	ska3_406-413:ska1_sorthis_197-206	ska3	K	410	ska1_sorthis	T	202	DVSNKEN	406-413	FIDEETKDTK	197-206	25	0.017142857142857144	1.82989e+16	TRUE	SKA123_F07.zhrm.csv	20171201_Q3_U3_1-10_AB_SA_PJH_20171117_SKA123_F7_XL-p.8053.8053.3 File:"20171201_Q3_U3_1-10_AB_SA_PJH_20171117_SKA123_F7_XL-p.raw", NativeID:"controllerType=0 controllerNumber=1 scan=8053"
Ska	74	Inter	ska3_S_6:ska2_K_14	ska3_6-10:ska2_8-25	ska3	S	6	ska2	K	14	SFBGK	6-10	LELMFQKAESDLDYIQYR	10-25	48	0.0	3.73033e+16	TRUE	SKA123_F09.zhrm.csv	20171201_Q3_U3_1-10_AB_SA_PJH_20171117_SKA123_F9_XL-p.18833.18833.3 File:"20171201_Q3_U3_1-10_AB_SA_PJH_20171117_SKA123_F9_XL-p.raw", NativeID:"controllerType=0 controllerNumber=1 scan=18833"
Ska	75	Inter	ska3_S_6:ska2_K_54	ska3_6-10:ska2_49-56	ska3	S	6	ska2	K	54	SFBGK	6-10	ELSVIKSR	49-56	74	0.0	3.24281e+16	TRUE	SKA123_F06.zhrm.csv	20171201_Q3_U3_1-2_AB_SA_PJH_20171117_SKA123_F6_XL-p.12259.12259.3 File:"20171201_Q3_U3_1-2_AB_SA_PJH_20171117_SKA123_F6_XL-p.raw", NativeID:"controllerType=0 controllerNumber=1 scan=12259"
Ska	76	Inter	ska3_S_6:ska2_K_65	ska3_6-12:ska2_64-72	ska3	S	6	ska2	K	65	SFBGKLR	6-12	FKPVAVEQK	64-72	20	0.04901960784313725	2.56599e+16	TRUE	SKA123_F07.zhrm.csv	20171201_Q3_U3_1-10_AB_SA_PJH_20171117_SKA123_F7_XL-p.10333.10333.3 File:"20171201_Q3_U3_1-10_AB_SA_PJH_20171117_SKA123_F7_XL-p.raw", NativeID:"controllerType=0 controllerNumber=1 scan=10333"
Ska	77	Inter	ska3_K_10:ska2_K_54	ska3_6-12:ska2_49-56	ska3	K	10	ska2	K	54	SFBGKLR	6-12	ELSVIKSR	49-56	113	0.0	1.481e+16	TRUE	SKA123_F06.zhrm.csv	20171201_Q3_U3_1-2_AB_SA_PJH_20171117_SKA123_F6_XL-p.12029.12029.3 File:"20171201_Q3_U3_1-2_AB_SA_PJH_20171117_SKA123_F6_XL-p.raw", NativeID:"controllerType=0 controllerNumber=1 scan=12029"
Ska	78	Inter	ska3_K_10:ska2_K_65	ska3_6-12:ska2_64-72	ska3	K	10	ska2	K	65	SFBGKLR	6-12	FKPVAVEQK	64-72	85	0.0	2.61982e+16	TRUE	SKA123_F06.zhrm.csv	20171201_Q3_U3_1-2_AB_SA_PJH_20171117_SKA123_F6_XL-p.11177.11177.3 File:"20171201_Q3_U3_1-2_AB_SA_PJH_20171117_SKA123_F6_XL-p.raw", NativeID:"controllerType=0 controllerNumber=1 scan=11177"
Ska	79	Inter	ska3_K_92:ska2_K_14	ska3_86-94:ska2_8-25	ska3	K	92	ska2	K	14	NSMDIMKIR	86-94	LELMFQKAESDLDYIQYR	10-25	25	0.04444444444444445	1.49688e+16	TRUE	SKA123_F08.zhrm.csv	20171201_Q3_U3_1-2_AB_SA_PJH_20171117_SKA123_F8_XL-p.21359.21359.4 File:"20171201_Q3_U3_1-2_AB_SA_PJH_20171117_SKA123_F8_XL-p.raw", NativeID:"controllerType=0 controllerNumber=1 scan=21359"
Ska	80	Inter	ska3_K_247:ska2_K_14	ska3_245-257:ska2_8-25	ska3	K	247	ska2	K	14	NNKSEEAIDTESR	245-257	LELMFQKAESDLDYIQYR	10-25	85	0.0	4472553295141660	TRUE	SKA123_F08.zhrm.csv	20171201_Q3_U3_1-2_AB_SA_PJH_20171117_SKA123_F8_XL-p.18949.18949.4 File:"20171201_Q3_U3_1-2_AB_SA_PJH_20171117_SKA123_F8_XL-p.raw", NativeID:"controllerType=0 controllerNumber=1 scan=18949"
Ska	81	Inter	ska3_K_399:ska2_K_14	ska3_397-405:ska2_8-25	ska3	K	399	ska2	K	14	FLKHGQNIR	397-405	LELMFQKAESDLDYIQYR	10-25	30	0.0136986301369863	2.81382e+16	TRUE	SKA123_F07.zhrm.csv	20171201_Q3_U3_1-10_AB_SA_PJH_20171117_SKA123_F7_XL-p.19615.19615.4 File:"20171201_Q3_U3_1-10_AB_SA_PJH_20171117_SKA123_F7_XL-p.raw", NativeID:"controllerType=0 controllerNumber=1 scan=19615"
Ska	82	Inter	ska3_K_399:ska2_S_17	ska3_397-405:ska2_15-25	ska3	K	399	ska2	S	17	FLKHGQNIR	397-405	AESDLDYIQYR	15-25	48	0.0	2.25381e+16	TRUE	SKA123_F06.zhrm.csv	20171201_Q3_U3_1-2_AB_SA_PJH_20171117_SKA123_F6_XL-p.12641.12641.5 File:"20171201_Q3_U3_1-2_AB_SA_PJH_20171117_SKA123_F6_XL-p.raw", NativeID:"controllerType=0 controllerNumber=1 scan=12641"
Ska	83	Inter	ska3_K_399:ska2_Y_21	ska3_397-405:ska2_15-25	ska3	K	399	ska2	Y	21	FLKHGQNIR	397-405	AESDLDYIQYR	15-25	40	0.0	0.9656909121143438	TRUE	SKA123_F07.zhrm.csv	20171201_Q3_U3_1-10_AB_SA_PJH_20171117_SKA123_F7_XL-p.11849.11849.3 File:"20171201_Q3_U3_1-10_AB_SA_PJH_20171117_SKA123_F7_XL-p.raw", NativeID:"controllerType=0 controllerNumber=1 scan=11849"
Ska	84	Inter	ska3_K_399:ska2_K_31	ska3_397-405:ska2_26-41	ska3	K	399	ska2	K	31	FLKHGQNIR	397-405	LEYEIKTNHPDSASEK	26-41	42	0.0	3022561742857520	TRUE	SKA123_F06.zhrm.csv	20171201_Q3_U3_1-2_AB_SA_PJH_20171117_SKA123_F6_XL-p.8588.8588.5 File:"20171201_Q3_U3_1-2_AB_SA_PJH_20171117_SKA123_F6_XL-p.raw", NativeID:"controllerType=0 controllerNumber=1 scan=8588"
Ska	85	Inter	ska3_S_408:ska2_K_65	ska3_406-413:ska2_64-72	ska3	S	408	ska2	K	65	DVSNKEN	406-413	FKPVAVEQK	64-72	23	0.026881720430107527	3.52635e+16	TRUE	SKA123_F07.zhrm.csv	20171201_Q3_U3_1-10_AB_SA_PJH_20171117_SKA123_F7_XL-p.9158.9158.3 File:"20171201_Q3_U3_1-10_AB_SA_PJH_20171117_SKA123_F7_XL-p.raw", NativeID:"controllerType=0 controllerNumber=1 scan=9158"
Ska	86	Inter	ska3_K_410:ska2_K_14	ska3_406-413:ska2_8-25	ska3	K	410	ska2	K	14	DVSNKEN	406-413	LELMFQKAESDLDYIQYR	10-25	102	0.0	3.1687e+16	TRUE	SKA123_F08.zhrm.csv	20171201_Q3_U3_1-2_AB_SA_PJH_20171117_SKA123_F8_XL-p.21961.21961.3 File:"20171201_Q3_U3_1-2_AB_SA_PJH_20171117_SKA123_F8_XL-p.raw", NativeID:"controllerType=0 controllerNumber=1 scan=21961"
Ska	87	Inter	ska3_K_410:ska2_S_17	ska3_406-413:ska2_15-25	ska3	K	410	ska2	S	17	DVSNKEN	406-413	AESDLDYIQYR	15-25	81	0.0	3.72019e+16	TRUE	SKA123_F08.zhrm.csv	20171201_Q3_U3_1-2_AB_SA_PJH_20171117_SKA123_F8_XL-p.12301.12301.3 File:"20171201_Q3_U3_1-2_AB_SA_PJH_20171117_SKA123_F8_XL-p.raw", NativeID:"controllerType=0 controllerNumber=1 scan=12301"
Ska	88	Inter	ska3_K_410:ska2_Y_21	ska3_406-413:ska2_15-25	ska3	K	410	ska2	Y	21	DVSNKEN	406-413	AESDLDYIQYR	15-25	71	0.0	2398505968272010	TRUE	SKA123_F07.zhrm.csv	20171201_Q3_U3_1-10_AB_SA_PJH_20171117_SKA123_F7_XL-p.14600.14600.3 File:"20171201_Q3_U3_1-10_AB_SA_PJH_20171117_SKA123_F7_XL-p.raw", NativeID:"controllerType=0 controllerNumber=1 scan=14600"
Ska	89	Inter	ska3_K_410:ska2_K_31	ska3_406-413:ska2_26-41	ska3	K	410	ska2	K	31	DVSNKEN	406-413	LEYEIKTNHPDSASEK	26-41	82	0.0	2.90312e+16	TRUE	SKA123_F07.zhrm.csv	20171201_Q3_U3_1-10_AB_SA_PJH_20171117_SKA123_F7_XL-p.8550.8550.3 File:"20171201_Q3_U3_1-10_AB_SA_PJH_20171117_SKA123_F7_XL-p.raw", NativeID:"controllerType=0 controllerNumber=1 scan=8550"
Ska	90	Inter	ska3_K_410:ska2_K_48	ska3_406-413:ska2_42-54	ska3	K	410	ska2	K	48	DVSNKEN	406-413	NPVTLLKELSVIK	42-54	95	0.0	3.05969e+16	TRUE	SKA123_F07.zhrm.csv	20171201_Q3_U3_1-10_AB_SA_PJH_20171117_SKA123_F7_XL-p.24472.24472.3 File:"20171201_Q3_U3_1-10_AB_SA_PJH_20171117_SKA123_F7_XL-p.raw", NativeID:"controllerType=0 controllerNumber=1 scan=24472"
Ska	1	Intra	ska1_sorthis_K_21:ska1_sorthis_T_34	ska1_sorthis_17-22:ska1_sorthis_28-36	ska1_sorthis	K	21	ska1_sorthis	T	34	IGNIKK	17-22	NBGQEPTLK	28-36	44	0.0	3.04907e+16	TRUE	SKA123_F07.zhrm.csv	20171201_Q3_U3_1-10_AB_SA_PJH_20171117_SKA123_F7_XL-p.8416.8416.3 File:"20171201_Q3_U3_1-10_AB_SA_PJH_20171117_SKA123_F7_XL-p.raw", NativeID:"controllerType=0 controllerNumber=1 scan=8416"
Ska	2	Intra	ska1_sorthis_K_21:ska1_sorthis_K_166	ska1_sorthis_17-22:ska1_sorthis_156-170	ska1_sorthis	K	21	ska1_sorthis	K	166	IGNIKK	17-22	LTYNQINDVIKEINK	156-170	27	0.018518518518518517	2.91349e+16	TRUE	SKA123_F07.zhrm.csv	20171201_Q3_U3_1-10_AB_SA_PJH_20171117_SKA123_F7_XL-p.17648.17648.3 File:"20171201_Q3_U3_1-10_AB_SA_PJH_20171117_SKA123_F7_XL-p.raw", NativeID:"controllerType=0 controllerNumber=1 scan=17648"
Ska	3	Intra	ska1_sorthis_K_21:ska1_sorthis_K_170	ska1_sorthis_17-22:ska1_sorthis_167-175	ska1_sorthis	K	21	ska1_sorthis	K	170	IGNIKK	17-22	EINKAVISK	167-175	23	0.042328042328042326	3.78655e+16	TRUE	SKA123_F06.zhrm.csv	20171201_Q3_U3_1-2_AB_SA_PJH_20171117_SKA123_F6_XL-p.8953.8953.3 File:"20171201_Q3_U3_1-2_AB_SA_PJH_20171117_SKA123_F6_XL-p.raw", NativeID:"controllerType=0 controllerNumber=1 scan=8953"
Ska	4	Intra	ska1_sorthis_K_21:ska1_sorthis_T_202	ska1_sorthis_17-22:ska1_sorthis_197-206	ska1_sorthis	K	21	ska1_sorthis	T	202	IGNIKK	17-22	FIDEETKDTK	197-206	24	0.02185792349726776	2.74468e+16	TRUE	SKA123_F07.zhrm.csv	20171201_Q3_U3_1-10_AB_SA_PJH_20171117_SKA123_F7_XL-p.7477.7477.3 File:"20171201_Q3_U3_1-10_AB_SA_PJH_20171117_SKA123_F7_XL-p.raw", NativeID:"controllerType=0 controllerNumber=1 scan=7477"
Ska	5	Intra	ska1_sorthis_K_22:ska1_sorthis_T_34	ska1_sorthis_22-27:ska1_sorthis_28-36	ska1_sorthis	K	22	ska1_sorthis	T	34	KTLSLR	22-27	NBGQEPTLK	28-36	24	0.02185792349726776	2224990992871340	TRUE	SKA123_F07.zhrm.csv	20171201_Q3_U3_1-10_AB_SA_PJH_20171117_SKA123_F7_XL-p.10147.10147.3 File:"20171201_Q3_U3_1-10_AB_SA_PJH_20171117_SKA123_F7_XL-p.raw", NativeID:"controllerType=0 controllerNumber=1 scan=10147"
Ska	6	Intra	ska1_sorthis_K_22:ska1_sorthis_T_202	ska1_sorthis_22-27:ska1_sorthis_197-206	ska1_sorthis	K	22	ska1_sorthis	T	202	KTLSLR	22-27	FIDEETKDTK	197-206	24	0.02185792349726776	2941266395336940	TRUE	SKA123_F07.zhrm.csv	20171201_Q3_U3_1-10_AB_SA_PJH_20171117_SKA123_F7_XL-p.10080.10080.4 File:"20171201_Q3_U3_1-10_AB_SA_PJH_20171117_SKA123_F7_XL-p.raw", NativeID:"controllerType=0 controllerNumber=1 scan=10080"
Ska	7	Intra	ska1_sorthis_T_23:ska1_sorthis_K_21	ska1_sorthis_23-27:ska1_sorthis_17-22	ska1_sorthis	T	23	ska1_sorthis	K	21	TLSLR	23-27	IGNIKK	17-22	32	0.015384615384615384	1.80845e+16	TRUE	SKA123_F06.zhrm.csv	20171201_Q3_U3_1-2_AB_SA_PJH_20171117_SKA123_F6_XL-p.7966.7966.4 File:"20171201_Q3_U3_1-2_AB_SA_PJH_20171117_SKA123_F6_XL-p.raw", NativeID:"controllerType=0 controllerNumber=1 scan=7966"
Ska	8	Intra	ska1_sorthis_S_25:ska1_sorthis_K_21	ska1_sorthis_23-27:ska1_sorthis_17-22	ska1_sorthis	S	25	ska1_sorthis	K	21	TLSLR	23-27	IGNIKK	17-22	37	0.0	2751013365383910	TRUE	SKA123_F06.zhrm.csv	20171201_Q3_U3_1-2_AB_SA_PJH_20171117_SKA123_F6_XL-p.7958.7958.3 File:"20171201_Q3_U3_1-2_AB_SA_PJH_20171117_SKA123_F6_XL-p.raw", NativeID:"controllerType=0 controllerNumber=1 scan=7958"
Ska	9	Intra	ska1_sorthis_K_166:ska1_sorthis_S_133	ska1_sorthis_156-170:ska1_sorthis_133-153	ska1_sorthis	K	166	ska1_sorthis	S	133	LTYNQINDVIKEINK	156-170	SIKEMPFITBDEFNGVPSYMK	133-153	91	0.0	4191540261029500	TRUE	SKA123_F08.zhrm.csv	20171201_Q3_U3_1-2_AB_SA_PJH_20171117_SKA123_F8_XL-p.22742.22742.4 File:"20171201_Q3_U3_1-2_AB_SA_PJH_20171117_SKA123_F8_XL-p.raw", NativeID:"controllerType=0 controllerNumber=1 scan=22742"
Ska	10	Intra	ska1_sorthis_K_170:ska1_sorthis_Y_176	ska1_sorthis_167-175:ska1_sorthis_176-183	ska1_sorthis	K	170	ska1_sorthis	Y	176	EINKAVISK	167-175	YKILHQPK	176-183	34	0.016260162601626018	2.64491e+16	TRUE	SKA123_F06.zhrm.csv	20171201_Q3_U3_1-2_AB_SA_PJH_20171117_SKA123_F6_XL-p.9449.9449.3 File:"20171201_Q3_U3_1-2_AB_SA_PJH_20171117_SKA123_F6_XL-p.raw", NativeID:"controllerType=0 controllerNumber=1 scan=9449"
Ska	11	Intra	ska1_sorthis_Y_176:ska1_sorthis_K_166	ska1_sorthis_176-183:ska1_sorthis_156-170	ska1_sorthis	Y	176	ska1_sorthis	K	166	YKILHQPK	176-183	LTYNQINDVIKEINK	156-170	42	0.0	3161956268255920	TRUE	SKA123_F07.zhrm.csv	20171201_Q3_U3_1-10_AB_SA_PJH_20171117_SKA123_F7_XL-p.16988.16988.4 File:"20171201_Q3_U3_1-10_AB_SA_PJH_20171117_SKA123_F7_XL-p.raw", NativeID:"controllerType=0 controllerNumber=1 scan=16988"
Ska	12	Intra	ska1_sorthis_K_184:ska1_sorthis_Y_176	ska1_sorthis_184-191:ska1_sorthis_176-183	ska1_sorthis	K	184	ska1_sorthis	Y	176	KSMNSVTR	184-191	YKILHQPK	176-183	30	0.0136986301369863	0.16861576808197776	TRUE	SKA123_F07.zhrm.csv	20171201_Q3_U3_1-10_AB_SA_PJH_20171117_SKA123_F7_XL-p.6216.6216.3 File:"20171201_Q3_U3_1-10_AB_SA_PJH_20171117_SKA123_F7_XL-p.raw", NativeID:"controllerType=0 controllerNumber=1 scan=6216"
Ska	13	Intra	ska1_sorthis_Y_194:ska1_sorthis_K_203	ska1_sorthis_192-196:ska1_sorthis_197-206	ska1_sorthis	Y	194	ska1_sorthis	K	203	NLYHR	192-196	FIDEETKDTK	197-206	24	0.044198895027624314	3.00413e+16	TRUE	SKA123_F06.zhrm.csv	20171201_Q3_U3_1-2_AB_SA_PJH_20171117_SKA123_F6_XL-p.8504.8504.3 File:"20171201_Q3_U3_1-2_AB_SA_PJH_20171117_SKA123_F6_XL-p.raw", NativeID:"controllerType=0 controllerNumber=1 scan=8504"
Ska	14	Intra	ska1_sorthis_T_205:ska1_sorthis_K_22	ska1_sorthis_204-208:ska1_sorthis_22-27	ska1_sorthis	T	205	ska1_sorthis	K	22	DTKGR	204-208	KTLSLR	22-27	29	0.0	1.94927e+16	TRUE	SKA123_F05.zhrm.csv	20171201_Q3_U3_1-10_AB_SA_PJH_20171117_SKA123_F5_XL-p.6417.6417.3 File:"20171201_Q3_U3_1-10_AB_SA_PJH_20171117_SKA123_F5_XL-p.raw", NativeID:"controllerType=0 controllerNumber=1 scan=6417"
Ska	15	Intra	ska1_sorthis_K_206:ska1_sorthis_K_22	ska1_sorthis_204-208:ska1_sorthis_22-27	ska1_sorthis	K	206	ska1_sorthis	K	22	DTKGR	204-208	KTLSLR	22-27	68	0.0	1.49867e+16	TRUE	SKA123_F06.zhrm.csv	20171201_Q3_U3_1-2_AB_SA_PJH_20171117_SKA123_F6_XL-p.7095.7095.3 File:"20171201_Q3_U3_1-2_AB_SA_PJH_20171117_SKA123_F6_XL-p.raw", NativeID:"controllerType=0 controllerNumber=1 scan=7095"
Ska	16	Intra	ska1_sorthis_K_206:ska1_sorthis_Y_194	ska1_sorthis_204-208:ska1_sorthis_192-196	ska1_sorthis	K	206	ska1_sorthis	Y	194	DTKGR	204-208	NLYHR	192-196	20	0.0	2327042413399450	TRUE	SKA123_F05.zhrm.csv	20171201_Q3_U3_1-10_AB_SA_PJH_20171117_SKA123_F5_XL-p.4652.4652.3 File:"20171201_Q3_U3_1-10_AB_SA_PJH_20171117_SKA123_F5_XL-p.raw", NativeID:"controllerType=0 controllerNumber=1 scan=4652"
Ska	17	Intra	ska1_sorthis_K_206:ska1_sorthis_T_202	ska1_sorthis_204-208:ska1_sorthis_197-203	ska1_sorthis	K	206	ska1_sorthis	T	202	DTKGR	204-208	FIDEETK	197-203	66	0.0	1582276087627850	TRUE	SKA123_F06.zhrm.csv	20171201_Q3_U3_1-2_AB_SA_PJH_20171117_SKA123_F6_XL-p.7371.7371.3 File:"20171201_Q3_U3_1-2_AB_SA_PJH_20171117_SKA123_F6_XL-p.raw", NativeID:"controllerType=0 controllerNumber=1 scan=7371"
Ska	18	Intra	ska1_sorthis_K_206:ska1_sorthis_Y_209	ska1_sorthis_204-208:ska1_sorthis_209-217	ska1_sorthis	K	206	ska1_sorthis	Y	209	DTKGR	204-208	YFIVEADIK	209-217	41	0.0	2736545598544000	TRUE	SKA123_F06.zhrm.csv	20171201_Q3_U3_1-2_AB_SA_PJH_20171117_SKA123_F6_XL-p.13691.13691.4 File:"20171201_Q3_U3_1-2_AB_SA_PJH_20171117_SKA123_F6_XL-p.raw", NativeID:"controllerType=0 controllerNumber=1 scan=13691"
Ska	19	Intra	ska1_sorthis_T_220:ska1_sorthis_K_227	ska1_sorthis_218-226:ska1_sorthis_227-236	ska1_sorthis	T	220	ska1_sorthis	K	227	EFTTLKADK	218-226	KFHVLLNILR	227-236	25	0.03428571428571429	3.16158e+16	TRUE	SKA123_F06.zhrm.csv	20171201_Q3_U3_1-2_AB_SA_PJH_20171117_SKA123_F6_XL-p.18154.18154.3 File:"20171201_Q3_U3_1-2_AB_SA_PJH_20171117_SKA123_F6_XL-p.raw", NativeID:"controllerType=0 controllerNumber=1 scan=18154"
Ska	20	Intra	ska1_sorthis_K_223:ska1_sorthis_K_227	ska1_sorthis_218-226:ska1_sorthis_227-236	ska1_sorthis	K	223	ska1_sorthis	K	227	EFTTLKADK	218-226	KFHVLLNILR	227-236	26	0.017341040462427744	1.81386e+16	TRUE	SKA123_F07.zhrm.csv	20171201_Q3_U3_1-10_AB_SA_PJH_20171117_SKA123_F7_XL-p.17842.17842.3 File:"20171201_Q3_U3_1-10_AB_SA_PJH_20171117_SKA123_F7_XL-p.raw", NativeID:"controllerType=0 controllerNumber=1 scan=17842"
Ska	21	Intra	ska1_sorthis_S_242:ska1_sorthis_K_203	ska1_sorthis_241-245:ska1_sorthis_197-206	ska1_sorthis	S	242	ska1_sorthis	K	203	LSEVR	241-245	FIDEETKDTK	197-206	27	0.018518518518518517	2.94895e+16	TRUE	SKA123_F07.zhrm.csv	20171201_Q3_U3_1-10_AB_SA_PJH_20171117_SKA123_F7_XL-p.7476.7476.3 File:"20171201_Q3_U3_1-10_AB_SA_PJH_20171117_SKA123_F7_XL-p.raw", NativeID:"controllerType=0 controllerNumber=1 scan=7476"
Ska	22	Intra	ska2_S_17:ska2_K_48	ska2_15-25:ska2_42-54	ska2	S	17	ska2	K	48	AESDLDYIQYR	15-25	NPVTLLKELSVIK	42-54	29	0.04651162790697674	4332688427563710	TRUE	SKA123_F08.zhrm.csv	20171201_Q3_U3_1-2_AB_SA_PJH_20171117_SKA123_F8_XL-p.21445.21445.4 File:"20171201_Q3_U3_1-2_AB_SA_PJH_20171117_SKA123_F8_XL-p.raw", NativeID:"controllerType=0 controllerNumber=1 scan=21445"
Ska	23	Intra	ska2_Y_21:ska2_K_31	ska2_15-25:ska2_26-41	ska2	Y	21	ska2	K	31	AESDLDYIQYR	15-25	LEYEIKTNHPDSASEK	26-41	53	0.0	2.90029e+16	TRUE	SKA123_F06.zhrm.csv	20171201_Q3_U3_1-2_AB_SA_PJH_20171117_SKA123_F6_XL-p.14411.14411.4 File:"20171201_Q3_U3_1-2_AB_SA_PJH_20171117_SKA123_F6_XL-p.raw", NativeID:"controllerType=0 controllerNumber=1 scan=14411"
Ska	24	Intra	ska2_Y_24:ska2_K_31	ska2_15-25:ska2_26-41	ska2	Y	24	ska2	K	31	AESDLDYIQYR	15-25	LEYEIKTNHPDSASEK	26-41	106	0.0	2410388820713110	TRUE	SKA123_F07.zhrm.csv	20171201_Q3_U3_1-10_AB_SA_PJH_20171117_SKA123_F7_XL-p.13747.13747.3 File:"20171201_Q3_U3_1-10_AB_SA_PJH_20171117_SKA123_F7_XL-p.raw", NativeID:"controllerType=0 controllerNumber=1 scan=13747"
Ska	25	Intra	ska2_K_48:ska2_Y_28	ska2_42-54:ska2_26-41	ska2	K	48	ska2	Y	28	NPVTLLKELSVIK	42-54	LEYEIKTNHPDSASEK	26-41	36	0.0	1289141571376850	TRUE	SKA123_F05.zhrm.csv	20171201_Q3_U3_1-10_AB_SA_PJH_20171117_SKA123_F5_XL-p.17313.17313.4 File:"20171201_Q3_U3_1-10_AB_SA_PJH_20171117_SKA123_F5_XL-p.raw", NativeID:"controllerType=0 controllerNumber=1 scan=17313"
Ska	26	Intra	ska2_K_48:ska2_K_31	ska2_42-54:ska2_26-41	ska2	K	48	ska2	K	31	NPVTLLKELSVIK	42-54	LEYEIKTNHPDSASEK	26-41	111	0.0	2354213036032650	TRUE	SKA123_F08.zhrm.csv	20171201_Q3_U3_1-2_AB_SA_PJH_20171117_SKA123_F8_XL-p.17321.17321.3 File:"20171201_Q3_U3_1-2_AB_SA_PJH_20171117_SKA123_F8_XL-p.raw", NativeID:"controllerType=0 controllerNumber=1 scan=17321"
Ska	27	Intra	ska2_S_51:ska2_K_54	ska2_49-56:ska2_42-56	ska2	S	51	ska2	K	54	ELSVIKSR	49-56	NPVTLLKELSVIKSR	42-56	36	0.017699115044247787	4362801274480270	TRUE	SKA123_F07.zhrm.csv	20171201_Q3_U3_1-10_AB_SA_PJH_20171117_SKA123_F7_XL-p.23129.23129.3 File:"20171201_Q3_U3_1-10_AB_SA_PJH_20171117_SKA123_F7_XL-p.raw", NativeID:"controllerType=0 controllerNumber=1 scan=23129"
Ska	28	Intra	ska2_K_54:ska2_K_54	ska2_49-56:ska2_42-56	ska2	K	54	ska2	K	54	ELSVIKSR	49-56	NPVTLLKELSVIKSR	42-56	90	0.0	3237804487610010	TRUE	SKA123_F07.zhrm.csv	20171201_Q3_U3_1-10_AB_SA_PJH_20171117_SKA123_F7_XL-p.23118.23118.4 File:"20171201_Q3_U3_1-10_AB_SA_PJH_20171117_SKA123_F7_XL-p.raw", NativeID:"controllerType=0 controllerNumber=1 scan=23118"
Ska	29	Intra	ska2_K_54:ska2_K_65	ska2_49-56:ska2_64-72	ska2	K	54	ska2	K	65	ELSVIKSR	49-56	FKPVAVEQK	64-72	77	0.0	2136965944763340	TRUE	SKA123_F07.zhrm.csv	20171201_Q3_U3_1-10_AB_SA_PJH_20171117_SKA123_F7_XL-p.11274.11274.3 File:"20171201_Q3_U3_1-10_AB_SA_PJH_20171117_SKA123_F7_XL-p.raw", NativeID:"controllerType=0 controllerNumber=1 scan=11274"
Ska	30	Intra	ska2_Y_57:ska2_K_65	ska2_57-63:ska2_64-72	ska2	Y	57	ska2	K	65	YQTLYAR	57-63	FKPVAVEQK	64-72	41	0.0	1.79433e+16	TRUE	SKA123_F06.zhrm.csv	20171201_Q3_U3_1-2_AB_SA_PJH_20171117_SKA123_F6_XL-p.11738.11738.3 File:"20171201_Q3_U3_1-2_AB_SA_PJH_20171117_SKA123_F6_XL-p.raw", NativeID:"controllerType=0 controllerNumber=1 scan=11738"
Ska	31	Intra	ska2_T_59:ska2_K_54	ska2_57-63:ska2_49-56	ska2	T	59	ska2	K	54	YQTLYAR	57-63	ELSVIKSR	49-56	33	0.015625	3850267125737580	TRUE	SKA123_F06.zhrm.csv	20171201_Q3_U3_1-2_AB_SA_PJH_20171117_SKA123_F6_XL-p.12857.12857.3 File:"20171201_Q3_U3_1-2_AB_SA_PJH_20171117_SKA123_F6_XL-p.raw", NativeID:"controllerType=0 controllerNumber=1 scan=12857"
Ska	32	Intra	ska2_T_59:ska2_K_65	ska2_57-63:ska2_64-72	ska2	T	59	ska2	K	65	YQTLYAR	57-63	FKPVAVEQK	64-72	20	0.04901960784313725	1.70299e+16	TRUE	SKA123_F07.zhrm.csv	20171201_Q3_U3_1-10_AB_SA_PJH_20171117_SKA123_F7_XL-p.11054.11054.3 File:"20171201_Q3_U3_1-10_AB_SA_PJH_20171117_SKA123_F7_XL-p.raw", NativeID:"controllerType=0 controllerNumber=1 scan=11054"
Ska	33	Intra	ska2_Y_61:ska2_K_65	ska2_57-63:ska2_64-72	ska2	Y	61	ska2	K	65	YQTLYAR	57-63	FKPVAVEQK	64-72	55	0.0	2964251854243810	TRUE	SKA123_F07.zhrm.csv	20171201_Q3_U3_1-10_AB_SA_PJH_20171117_SKA123_F7_XL-p.11076.11076.4 File:"20171201_Q3_U3_1-10_AB_SA_PJH_20171117_SKA123_F7_XL-p.raw", NativeID:"controllerType=0 controllerNumber=1 scan=11076"
Ska	34	Intra	ska2_K_65:ska2_K_65	ska2_64-72:ska2_64-72	ska2	K	65	ska2	K	65	FKPVAVEQK	64-72	FKPVAVEQK	64-72	116	0.0	2.63328e+16	TRUE	SKA123_F07.zhrm.csv	20171201_Q3_U3_1-10_AB_SA_PJH_20171117_SKA123_F7_XL-p.10342.10342.3 File:"20171201_Q3_U3_1-10_AB_SA_PJH_20171117_SKA123_F7_XL-p.raw", NativeID:"controllerType=0 controllerNumber=1 scan=10342"
Ska	35	Intra	ska2_S_74:ska2_K_65	ska2_73-77:ska2_64-72	ska2	S	74	ska2	K	65	ESKSR	73-77	FKPVAVEQK	64-72	56	0.0	1.6304e+16	TRUE	SKA123_F06.zhrm.csv	20171201_Q3_U3_1-2_AB_SA_PJH_20171117_SKA123_F6_XL-p.6465.6465.4 File:"20171201_Q3_U3_1-2_AB_SA_PJH_20171117_SKA123_F6_XL-p.raw", NativeID:"controllerType=0 controllerNumber=1 scan=6465"
Ska	36	Intra	ska2_K_75:ska2_T_81	ska2_73-77:ska2_78-84	ska2	K	75	ska2	T	81	ESKSR	73-77	IBATVKK	78-84	12	0.04901960784313725	1.52157e+16	TRUE	SKA123_F05.zhrm.csv	20171201_Q3_U3_1-10_AB_SA_PJH_20171117_SKA123_F5_XL-p.3721.3721.3 File:"20171201_Q3_U3_1-10_AB_SA_PJH_20171117_SKA123_F5_XL-p.raw", NativeID:"controllerType=0 controllerNumber=1 scan=3721"
Ska	37	Intra	ska2_S_76:ska2_K_65	ska2_73-77:ska2_64-72	ska2	S	76	ska2	K	65	ESKSR	73-77	FKPVAVEQK	64-72	21	0.0	2963750645689530	TRUE	SKA123_F05.zhrm.csv	20171201_Q3_U3_1-10_AB_SA_PJH_20171117_SKA123_F5_XL-p.5860.5860.3 File:"20171201_Q3_U3_1-10_AB_SA_PJH_20171117_SKA123_F5_XL-p.raw", NativeID:"controllerType=0 controllerNumber=1 scan=5860"
Ska	38	Intra	ska2_K_83:ska2_K_91	ska2_78-84:ska2_85-94	ska2	K	83	ska2	K	91	IBATVKK	78-84	TMNMIQKLQK	85-94	54	0.0	2971370787502200	TRUE	SKA123_F07.zhrm.csv	20171201_Q3_U3_1-10_AB_SA_PJH_20171117_SKA123_F7_XL-p.11378.11378.4 File:"20171201_Q3_U3_1-10_AB_SA_PJH_20171117_SKA123_F7_XL-p.raw", NativeID:"controllerType=0 controllerNumber=1 scan=11378"
Ska	39	Intra	ska3_S_6:ska3_K_10	ska3_6-10:ska3_6-12	ska3	S	6	ska3	K	10	SFBGK	6-10	SFBGKLR	6-12	87	0.0	1.95943e+16	TRUE	SKA123_F06.zhrm.csv	20171201_Q3_U3_1-2_AB_SA_PJH_20171117_SKA123_F6_XL-p.11188.11188.3 File:"20171201_Q3_U3_1-2_AB_SA_PJH_20171117_SKA123_F6_XL-p.raw", NativeID:"controllerType=0 controllerNumber=1 scan=11188"
Ska	40	Intra	ska3_S_6:ska3_K_64	ska3_6-10:ska3_56-66	ska3	S	6	ska3	K	64	SFBGK	6-10	DDINILLDKAR	56-66	109	0.0	3.66218e+16	TRUE	SKA123_F07.zhrm.csv	20171201_Q3_U3_1-10_AB_SA_PJH_20171117_SKA123_F7_XL-p.20014.20014.3 File:"20171201_Q3_U3_1-10_AB_SA_PJH_20171117_SKA123_F7_XL-p.raw", NativeID:"controllerType=0 controllerNumber=1 scan=20014"
Ska	41	Intra	ska3_S_6:ska3_K_92	ska3_6-10:ska3_86-94	ska3	S	6	ska3	K	92	SFBGK	6-10	NSMDIMKIR	86-94	96	0.0	0.944847676260664	TRUE	SKA123_F06.zhrm.csv	20171201_Q3_U3_1-2_AB_SA_PJH_20171117_SKA123_F6_XL-p.15362.15362.3 File:"20171201_Q3_U3_1-2_AB_SA_PJH_20171117_SKA123_F6_XL-p.raw", NativeID:"controllerType=0 controllerNumber=1 scan=15362"
Ska	42	Intra	ska3_S_6:ska3_K_99	ska3_6-10:ska3_95-105	ska3	S	6	ska3	K	99	SFBGK	6-10	EYFQKYGYSPR	95-105	78	0.0	2.07343e+16	TRUE	SKA123_F07.zhrm.csv	20171201_Q3_U3_1-10_AB_SA_PJH_20171117_SKA123_F7_XL-p.14047.14047.3 File:"20171201_Q3_U3_1-10_AB_SA_PJH_20171117_SKA123_F7_XL-p.raw", NativeID:"controllerType=0 controllerNumber=1 scan=14047"
Ska	43	Intra	ska3_S_6:ska3_K_247	ska3_6-10:ska3_245-257	ska3	S	6	ska3	K	247	SFBGK	6-10	NNKSEEAIDTESR	245-257	92	0.0	0.7605930218217695	TRUE	SKA123_F05.zhrm.csv	20171201_Q3_U3_1-10_AB_SA_PJH_20171117_SKA123_F5_XL-p.8411.8411.3 File:"20171201_Q3_U3_1-10_AB_SA_PJH_20171117_SKA123_F5_XL-p.raw", NativeID:"controllerType=0 controllerNumber=1 scan=8411"
Ska	44	Intra	ska3_S_6:ska3_K_399	ska3_6-10:ska3_397-405	ska3	S	6	ska3	K	399	SFBGK	6-10	FLKHGQNIR	397-405	41	0.0	1.79067e+16	TRUE	SKA123_F05.zhrm.csv	20171201_Q3_U3_1-10_AB_SA_PJH_20171117_SKA123_F5_XL-p.7259.7259.3 File:"20171201_Q3_U3_1-10_AB_SA_PJH_20171117_SKA123_F5_XL-p.raw", NativeID:"controllerType=0 controllerNumber=1 scan=7259"
Ska	45	Intra	ska3_S_6:ska3_K_410	ska3_6-10:ska3_406-413	ska3	S	6	ska3	K	410	SFBGK	6-10	DVSNKEN	406-413	41	0.0	2913300116978500	TRUE	SKA123_F06.zhrm.csv	20171201_Q3_U3_1-2_AB_SA_PJH_20171117_SKA123_F6_XL-p.8894.8894.3 File:"20171201_Q3_U3_1-2_AB_SA_PJH_20171117_SKA123_F6_XL-p.raw", NativeID:"controllerType=0 controllerNumber=1 scan=8894"
Ska	46	Intra	ska3_K_10:ska3_K_10	ska3_6-12:ska3_6-12	ska3	K	10	ska3	K	10	SFBGKLR	6-12	SFBGKLR	6-12	121	0.0	2127376596089980	TRUE	SKA123_F06.zhrm.csv	20171201_Q3_U3_1-2_AB_SA_PJH_20171117_SKA123_F6_XL-p.11152.11152.4 File:"20171201_Q3_U3_1-2_AB_SA_PJH_20171117_SKA123_F6_XL-p.raw", NativeID:"controllerType=0 controllerNumber=1 scan=11152"
Ska	47	Intra	ska3_K_10:ska3_S_13	ska3_6-12:ska3_13-24	ska3	K	10	ska3	S	13	SFBGKLR	6-12	SLASTLDBETAR	13-24	124	0.0	4166491182970160	TRUE	SKA123_F08.zhrm.csv	20171201_Q3_U3_1-2_AB_SA_PJH_20171117_SKA123_F8_XL-p.12971.12971.3 File:"20171201_Q3_U3_1-2_AB_SA_PJH_20171117_SKA123_F8_XL-p.raw", NativeID:"controllerType=0 controllerNumber=1 scan=12971"
Ska	48	Intra	ska3_K_10:ska3_S_16	ska3_6-12:ska3_13-24	ska3	K	10	ska3	S	16	SFBGKLR	6-12	SLASTLDBETAR	13-24	49	0.0	1.27623e+16	TRUE	SKA123_F06.zhrm.csv	20171201_Q3_U3_1-2_AB_SA_PJH_20171117_SKA123_F6_XL-p.13345.13345.4 File:"20171201_Q3_U3_1-2_AB_SA_PJH_20171117_SKA123_F6_XL-p.raw", NativeID:"controllerType=0 controllerNumber=1 scan=13345"
Ska	49	Intra	ska3_K_10:ska3_K_92	ska3_6-12:ska3_86-94	ska3	K	10	ska3	K	92	SFBGKLR	6-12	NSMDIMKIR	86-94	64	0.0	3609883017806540	TRUE	SKA123_F06.zhrm.csv	20171201_Q3_U3_1-2_AB_SA_PJH_20171117_SKA123_F6_XL-p.14422.14422.4 File:"20171201_Q3_U3_1-2_AB_SA_PJH_20171117_SKA123_F6_XL-p.raw", NativeID:"controllerType=0 controllerNumber=1 scan=14422"
Ska	50	Intra	ska3_K_10:ska3_K_247	ska3_6-12:ska3_245-257	ska3	K	10	ska3	K	247	SFBGKLR	6-12	NNKSEEAIDTESR	245-257	34	0.016260162601626018	272460822148206	TRUE	SKA123_F06.zhrm.csv	20171201_Q3_U3_1-2_AB_SA_PJH_20171117_SKA123_F6_XL-p.9645.9645.3 File:"20171201_Q3_U3_1-2_AB_SA_PJH_20171117_SKA123_F6_XL-p.raw", NativeID:"controllerType=0 controllerNumber=1 scan=9645"
Ska	51	Intra	ska3_K_10:ska3_K_399	ska3_6-12:ska3_397-405	ska3	K	10	ska3	K	399	SFBGKLR	6-12	FLKHGQNIR	397-405	91	0.0	3192710695284370	TRUE	SKA123_F06.zhrm.csv	20171201_Q3_U3_1-2_AB_SA_PJH_20171117_SKA123_F6_XL-p.8610.8610.5 File:"20171201_Q3_U3_1-2_AB_SA_PJH_20171117_SKA123_F6_XL-p.raw", NativeID:"controllerType=0 controllerNumber=1 scan=8610"
Ska	52	Intra	ska3_T_22:ska3_K_247	ska3_13-24:ska3_245-257	ska3	T	22	ska3	K	247	SLASTLDBETAR	13-24	NNKSEEAIDTESR	245-257	40	0.0	202867980430248	TRUE	SKA123_F07.zhrm.csv	20171201_Q3_U3_1-10_AB_SA_PJH_20171117_SKA123_F7_XL-p.11019.11019.3 File:"20171201_Q3_U3_1-10_AB_SA_PJH_20171117_SKA123_F7_XL-p.raw", NativeID:"controllerType=0 controllerNumber=1 scan=11019"
Ska	53	Intra	ska3_T_79:ska3_K_247	ska3_78-85:ska3_245-257	ska3	T	79	ska3	K	247	ATKVLMEK	78-85	NNKSEEAIDTESR	245-257	71	0.0	2.7452e+16	TRUE	SKA123_F07.zhrm.csv	20171201_Q3_U3_1-10_AB_SA_PJH_20171117_SKA123_F7_XL-p.8329.8329.4 File:"20171201_Q3_U3_1-10_AB_SA_PJH_20171117_SKA123_F7_XL-p.raw", NativeID:"controllerType=0 controllerNumber=1 scan=8329"
Ska	54	Intra	ska3_S_87:ska3_K_99	ska3_86-94:ska3_95-105	ska3	S	87	ska3	K	99	NSMDImKIR	86-94	EYFQKYGYSPR	95-105	25	0.0	1.94931e+16	TRUE	SKA123_F05.zhrm.csv	20171201_Q3_U3_1-10_AB_SA_PJH_20171117_SKA123_F5_XL-p.14475.14475.3 File:"20171201_Q3_U3_1-10_AB_SA_PJH_20171117_SKA123_F5_XL-p.raw", NativeID:"controllerType=0 controllerNumber=1 scan=14475"
Ska	55	Intra	ska3_S_87:ska3_K_247	ska3_86-94:ska3_245-257	ska3	S	87	ska3	K	247	NSMDIMKIR	86-94	NNKSEEAIDTESR	245-257	12	0.04901960784313725	2415301270844930	TRUE	SKA123_F05.zhrm.csv	20171201_Q3_U3_1-10_AB_SA_PJH_20171117_SKA123_F5_XL-p.11397.11397.3 File:"20171201_Q3_U3_1-10_AB_SA_PJH_20171117_SKA123_F5_XL-p.raw", NativeID:"controllerType=0 controllerNumber=1 scan=11397"
Ska	56	Intra	ska3_K_92:ska3_K_92	ska3_86-94:ska3_86-94	ska3	K	92	ska3	K	92	NSMDIMKIR	86-94	NSMDIMKIR	86-94	136	0.0	3.39875e+16	TRUE	SKA123_F06.zhrm.csv	20171201_Q3_U3_1-2_AB_SA_PJH_20171117_SKA123_F6_XL-p.17596.17596.3 File:"20171201_Q3_U3_1-2_AB_SA_PJH_20171117_SKA123_F6_XL-p.raw", NativeID:"controllerType=0 controllerNumber=1 scan=17596"
Ska	57	Intra	ska3_K_92:ska3_Y_96	ska3_86-94:ska3_95-105	ska3	K	92	ska3	Y	96	NSMDIMKIR	86-94	EYFQKYGYSPR	95-105	68	0.0	401866097271943	TRUE	SKA123_F07.zhrm.csv	20171201_Q3_U3_1-10_AB_SA_PJH_20171117_SKA123_F7_XL-p.18005.18005.4 File:"20171201_Q3_U3_1-10_AB_SA_PJH_20171117_SKA123_F7_XL-p.raw", NativeID:"controllerType=0 controllerNumber=1 scan=18005"
Ska	58	Intra	ska3_K_92:ska3_K_99	ska3_86-94:ska3_95-105	ska3	K	92	ska3	K	99	NSMDIMKIR	86-94	EYFQKYGYSPR	95-105	122	0.0	2297626027184170	TRUE	SKA123_F04.zhrm.csv	20171201_Q3_U3_1-2_AB_SA_PJH_20171117_SKA123_F4_XL-p.10652.10652.3 File:"20171201_Q3_U3_1-2_AB_SA_PJH_20171117_SKA123_F4_XL-p.raw", NativeID:"controllerType=0 controllerNumber=1 scan=10652"
Ska	59	Intra	ska3_K_92:ska3_K_247	ska3_86-94:ska3_245-257	ska3	K	92	ska3	K	247	NSMDIMKIR	86-94	NNKSEEAIDTESR	245-257	103	0.0	3.57748e+16	TRUE	SKA123_F07.zhrm.csv	20171201_Q3_U3_1-10_AB_SA_PJH_20171117_SKA123_F7_XL-p.12071.12071.3 File:"20171201_Q3_U3_1-10_AB_SA_PJH_20171117_SKA123_F7_XL-p.raw", NativeID:"controllerType=0 controllerNumber=1 scan=12071"
Ska	60	Intra	ska3_K_92:ska3_K_399	ska3_86-94:ska3_397-405	ska3	K	92	ska3	K	399	NSMDIMKIR	86-94	FLKHGQNIR	397-405	77	0.0	2932755036094390	TRUE	SKA123_F07.zhrm.csv	20171201_Q3_U3_1-10_AB_SA_PJH_20171117_SKA123_F7_XL-p.10542.10542.4 File:"20171201_Q3_U3_1-10_AB_SA_PJH_20171117_SKA123_F7_XL-p.raw", NativeID:"controllerType=0 controllerNumber=1 scan=10542"
Ska	61	Intra	ska3_Y_96:ska3_K_247	ska3_95-105:ska3_245-257	ska3	Y	96	ska3	K	247	EYFQKYGYSPR	95-105	NNKSEEAIDTESR	245-257	27	0.025157232704402517	0.8919234911802748	TRUE	SKA123_F06.zhrm.csv	20171201_Q3_U3_1-2_AB_SA_PJH_20171117_SKA123_F6_XL-p.12464.12464.3 File:"20171201_Q3_U3_1-2_AB_SA_PJH_20171117_SKA123_F6_XL-p.raw", NativeID:"controllerType=0 controllerNumber=1 scan=12464"
Ska	62	Intra	ska3_K_99:ska3_S_34	ska3_95-105:ska3_28-42	ska3	K	99	ska3	S	34	EYFQKYGYSPR	95-105	ALDGEESDFEDYPMR	28-42	32	0.015873015873015872	1.00162e+16	TRUE	SKA123_F07.zhrm.csv	20171201_Q3_U3_1-10_AB_SA_PJH_20171117_SKA123_F7_XL-p.15795.15795.3 File:"20171201_Q3_U3_1-10_AB_SA_PJH_20171117_SKA123_F7_XL-p.raw", NativeID:"controllerType=0 controllerNumber=1 scan=15795"
Ska	63	Intra	ska3_K_99:ska3_K_247	ska3_95-105:ska3_245-257	ska3	K	99	ska3	K	247	EYFQKYGYSPR	95-105	NNKSEEAIDTESR	245-257	94	0.0	333619255642856	TRUE	SKA123_F07.zhrm.csv	20171201_Q3_U3_1-10_AB_SA_PJH_20171117_SKA123_F7_XL-p.11630.11630.3 File:"20171201_Q3_U3_1-10_AB_SA_PJH_20171117_SKA123_F7_XL-p.raw", NativeID:"controllerType=0 controllerNumber=1 scan=11630"
Ska	64	Intra	ska3_S_145:ska3_K_247	ska3_136-151:ska3_242-257	ska3	S	145	ska3	K	247	DDLSDPPVASSBISEK	136-151	NARNNKSEEAIDTESR	242-257	33	0.025	4980389521221390	TRUE	SKA123_F08.zhrm.csv	20171201_Q3_U3_1-2_AB_SA_PJH_20171117_SKA123_F8_XL-p.10206.10206.4 File:"20171201_Q3_U3_1-2_AB_SA_PJH_20171117_SKA123_F8_XL-p.raw", NativeID:"controllerType=0 controllerNumber=1 scan=10206"
Ska	65	Intra	ska3_K_247:ska3_S_34	ska3_245-257:ska3_28-42	ska3	K	247	ska3	S	34	NNKSEEAIDTESR	245-257	ALDGEESDFEDYPMR	28-42	73	0.0	4201242791339300	TRUE	SKA123_F08.zhrm.csv	20171201_Q3_U3_1-2_AB_SA_PJH_20171117_SKA123_F8_XL-p.11995.11995.4 File:"20171201_Q3_U3_1-2_AB_SA_PJH_20171117_SKA123_F8_XL-p.raw", NativeID:"controllerType=0 controllerNumber=1 scan=11995"
Ska	66	Intra	ska3_K_247:ska3_S_103	ska3_245-257:ska3_93-105	ska3	K	247	ska3	S	103	NNKSEEAIDTESR	245-257	IREYFQKYGYSPR	93-105	23	0.042328042328042326	0.5595923646217374	TRUE	SKA123_F06.zhrm.csv	20171201_Q3_U3_1-2_AB_SA_PJH_20171117_SKA123_F6_XL-p.11842.11842.4 File:"20171201_Q3_U3_1-2_AB_SA_PJH_20171117_SKA123_F6_XL-p.raw", NativeID:"controllerType=0 controllerNumber=1 scan=11842"
Ska	67	Intra	ska3_K_247:ska3_K_241	ska3_245-257:ska3_220-244	ska3	K	247	ska3	K	241	NNKSEEAIDTESR	245-257	LEHFGISEYTMBLNEDYTMGLKNAR	220-244	87	0.0	3.20772e+16	TRUE	SKA123_F08.zhrm.csv	20171201_Q3_U3_1-2_AB_SA_PJH_20171117_SKA123_F8_XL-p.16379.16379.4 File:"20171201_Q3_U3_1-2_AB_SA_PJH_20171117_SKA123_F8_XL-p.raw", NativeID:"controllerType=0 controllerNumber=1 scan=16379"
Ska	68	Intra	ska3_S_394:ska3_K_399	ska3_390-396:ska3_397-405	ska3	S	394	ska3	K	399	AVPPSKR	390-396	FLKHGQNIR	397-405	31	0.021897810218978103	0.7362444417213849	TRUE	SKA123_F06.zhrm.csv	20171201_Q3_U3_1-2_AB_SA_PJH_20171117_SKA123_F6_XL-p.6285.6285.3 File:"20171201_Q3_U3_1-2_AB_SA_PJH_20171117_SKA123_F6_XL-p.raw", NativeID:"controllerType=0 controllerNumber=1 scan=6285"
Ska	69	Intra	ska3_K_399:ska3_S_16	ska3_397-405:ska3_13-24	ska3	K	399	ska3	S	16	FLKHGQNIR	397-405	SLASTLDBETAR	13-24	38	0.0	4266959620326580	TRUE	SKA123_F06.zhrm.csv	20171201_Q3_U3_1-2_AB_SA_PJH_20171117_SKA123_F6_XL-p.9491.9491.4 File:"20171201_Q3_U3_1-2_AB_SA_PJH_20171117_SKA123_F6_XL-p.raw", NativeID:"controllerType=0 controllerNumber=1 scan=9491"
Ska	70	Intra	ska3_K_399:ska3_T_22	ska3_397-405:ska3_13-24	ska3	K	399	ska3	T	22	FLKHGQNIR	397-405	SLASTLDBETAR	13-24	46	0.0	1.46633e+16	TRUE	SKA123_F06.zhrm.csv	20171201_Q3_U3_1-2_AB_SA_PJH_20171117_SKA123_F6_XL-p.10790.10790.4 File:"20171201_Q3_U3_1-2_AB_SA_PJH_20171117_SKA123_F6_XL-p.raw", NativeID:"controllerType=0 controllerNumber=1 scan=10790"
Ska	71	Intra	ska3_K_399:ska3_Y_39	ska3_397-405:ska3_28-42	ska3	K	399	ska3	Y	39	FLKHGQNIR	397-405	ALDGEESDFEDYPMR	28-42	31	0.014492753623188406	2008756764869000	TRUE	SKA123_F07.zhrm.csv	20171201_Q3_U3_1-10_AB_SA_PJH_20171117_SKA123_F7_XL-p.13102.13102.5 File:"20171201_Q3_U3_1-10_AB_SA_PJH_20171117_SKA123_F7_XL-p.raw", NativeID:"controllerType=0 controllerNumber=1 scan=13102"
Ska	72	Intra	ska3_K_399:ska3_K_64	ska3_397-405:ska3_56-66	ska3	K	399	ska3	K	64	FLKHGQNIR	397-405	DDINILLDKAR	56-66	53	0.0	1774120756243900	TRUE	SKA123_F06.zhrm.csv	20171201_Q3_U3_1-2_AB_SA_PJH_20171117_SKA123_F6_XL-p.15721.15721.3 File:"20171201_Q3_U3_1-2_AB_SA_PJH_20171117_SKA123_F6_XL-p.raw", NativeID:"controllerType=0 controllerNumber=1 scan=15721"
Ska	73	Intra	ska3_K_399:ska3_K_99	ska3_397-405:ska3_95-105	ska3	K	399	ska3	K	99	FLKHGQNIR	397-405	EYFQKYGYSPR	95-105	92	0.0	2426742582651130	TRUE	SKA123_F06.zhrm.csv	20171201_Q3_U3_1-2_AB_SA_PJH_20171117_SKA123_F6_XL-p.11089.11089.5 File:"20171201_Q3_U3_1-2_AB_SA_PJH_20171117_SKA123_F6_XL-p.raw", NativeID:"controllerType=0 controllerNumber=1 scan=11089"
Ska	74	Intra	ska3_K_399:ska3_S_155	ska3_397-405:ska3_155-165	ska3	K	399	ska3	S	155	FLKHGQNIR	397-405	SPQLSDFGLER	155-165	41	0.0	1940448607885350	TRUE	SKA123_F07.zhrm.csv	20171201_Q3_U3_1-10_AB_SA_PJH_20171117_SKA123_F7_XL-p.14264.14264.3 File:"20171201_Q3_U3_1-10_AB_SA_PJH_20171117_SKA123_F7_XL-p.raw", NativeID:"controllerType=0 controllerNumber=1 scan=14264"
Ska	75	Intra	ska3_K_399:ska3_K_247	ska3_397-405:ska3_245-257	ska3	K	399	ska3	K	247	FLKHGQNIR	397-405	NNKSEEAIDTESR	245-257	48	0.0	2.3702e+16	TRUE	SKA123_F07.zhrm.csv	20171201_Q3_U3_1-10_AB_SA_PJH_20171117_SKA123_F7_XL-p.6567.6567.3 File:"20171201_Q3_U3_1-10_AB_SA_PJH_20171117_SKA123_F7_XL-p.raw", NativeID:"controllerType=0 controllerNumber=1 scan=6567"
Ska	76	Intra	ska3_K_399:ska3_S_248	ska3_397-405:ska3_248-257	ska3	K	399	ska3	S	248	FLKHGQNIR	397-405	SEEAIDTESR	248-257	28	0.01910828025477707	3.45699e+16	TRUE	SKA123_F07.zhrm.csv	20171201_Q3_U3_1-10_AB_SA_PJH_20171117_SKA123_F7_XL-p.7738.7738.3 File:"20171201_Q3_U3_1-10_AB_SA_PJH_20171117_SKA123_F7_XL-p.raw", NativeID:"controllerType=0 controllerNumber=1 scan=7738"
Ska	77	Intra	ska3_K_399:ska3_T_342	ska3_397-405:ska3_328-357	ska3	K	399	ska3	T	342	FLKHGQNIR	397-405	TSLVLNSDTBFENLTDPSSPTISSYENLLR	328-357	29	0.013513513513513514	4534144768685960	TRUE	SKA123_F07.zhrm.csv	20171201_Q3_U3_1-10_AB_SA_PJH_20171117_SKA123_F7_XL-p.20941.20941.4 File:"20171201_Q3_U3_1-10_AB_SA_PJH_20171117_SKA123_F7_XL-p.raw", NativeID:"controllerType=0 controllerNumber=1 scan=20941"
Ska	78	Intra	ska3_K_399:ska3_S_345	ska3_397-405:ska3_328-357	ska3	K	399	ska3	S	345	FLKHGQNIR	397-405	TSLVLNSDTBFENLTDPSSPTISSYENLLR	328-357	24	0.0425531914893617	4987350206768940	TRUE	SKA123_F08.zhrm.csv	20171201_Q3_U3_1-2_AB_SA_PJH_20171117_SKA123_F8_XL-p.18291.18291.5 File:"20171201_Q3_U3_1-2_AB_SA_PJH_20171117_SKA123_F8_XL-p.raw", NativeID:"controllerType=0 controllerNumber=1 scan=18291"
Ska	79	Intra	ska3_K_399:ska3_K_399	ska3_397-405:ska3_397-405	ska3	K	399	ska3	K	399	FLKHGQNIR	397-405	FLKHGQNIR	397-405	121	0.0	1.51087e+16	TRUE	SKA123_F06.zhrm.csv	20171201_Q3_U3_1-2_AB_SA_PJH_20171117_SKA123_F6_XL-p.6962.6962.4 File:"20171201_Q3_U3_1-2_AB_SA_PJH_20171117_SKA123_F6_XL-p.raw", NativeID:"controllerType=0 controllerNumber=1 scan=6962"
Ska	80	Intra	ska3_S_408:ska3_K_10	ska3_406-413:ska3_6-12	ska3	S	408	ska3	K	10	DVSNKEN	406-413	SFBGKLR	6-12	31	0.021897810218978103	1217817477439840	TRUE	SKA123_F06.zhrm.csv	20171201_Q3_U3_1-2_AB_SA_PJH_20171117_SKA123_F6_XL-p.9777.9777.3 File:"20171201_Q3_U3_1-2_AB_SA_PJH_20171117_SKA123_F6_XL-p.raw", NativeID:"controllerType=0 controllerNumber=1 scan=9777"
Ska	81	Intra	ska3_S_408:ska3_K_64	ska3_406-413:ska3_56-66	ska3	S	408	ska3	K	64	DVSNKEN	406-413	DDINILLDKAR	56-66	30	0.0136986301369863	2.95741e+16	TRUE	SKA123_F07.zhrm.csv	20171201_Q3_U3_1-10_AB_SA_PJH_20171117_SKA123_F7_XL-p.19438.19438.3 File:"20171201_Q3_U3_1-10_AB_SA_PJH_20171117_SKA123_F7_XL-p.raw", NativeID:"controllerType=0 controllerNumber=1 scan=19438"
Ska	82	Intra	ska3_S_408:ska3_K_92	ska3_406-413:ska3_86-94	ska3	S	408	ska3	K	92	DVSNKEN	406-413	NSMDIMKIR	86-94	36	0.0	0.39187634742851457	TRUE	SKA123_F05.zhrm.csv	20171201_Q3_U3_1-10_AB_SA_PJH_20171117_SKA123_F5_XL-p.12596.12596.3 File:"20171201_Q3_U3_1-10_AB_SA_PJH_20171117_SKA123_F5_XL-p.raw", NativeID:"controllerType=0 controllerNumber=1 scan=12596"
Ska	83	Intra	ska3_S_408:ska3_K_99	ska3_406-413:ska3_95-105	ska3	S	408	ska3	K	99	DVSNKEN	406-413	EYFQKYGYSPR	95-105	14	0.04301075268817205	2.08094e+16	TRUE	SKA123_F05.zhrm.csv	20171201_Q3_U3_1-10_AB_SA_PJH_20171117_SKA123_F5_XL-p.12097.12097.3 File:"20171201_Q3_U3_1-10_AB_SA_PJH_20171117_SKA123_F5_XL-p.raw", NativeID:"controllerType=0 controllerNumber=1 scan=12097"
Ska	84	Intra	ska3_S_408:ska3_K_247	ska3_406-413:ska3_245-257	ska3	S	408	ska3	K	247	DVSNKEN	406-413	NNKSEEAIDTESR	245-257	37	0.00909090909090909	1896673773132880	TRUE	SKA123_F07.zhrm.csv	20171201_Q3_U3_1-10_AB_SA_PJH_20171117_SKA123_F7_XL-p.7276.7276.3 File:"20171201_Q3_U3_1-10_AB_SA_PJH_20171117_SKA123_F7_XL-p.raw", NativeID:"controllerType=0 controllerNumber=1 scan=7276"
Ska	85	Intra	ska3_S_408:ska3_K_399	ska3_406-413:ska3_397-405	ska3	S	408	ska3	K	399	DVSNKEN	406-413	FLKHGQNIR	397-405	37	0.0	1.40626e+16	TRUE	SKA123_F04.zhrm.csv	20171201_Q3_U3_1-2_AB_SA_PJH_20171117_SKA123_F4_XL-p.5162.5162.4 File:"20171201_Q3_U3_1-2_AB_SA_PJH_20171117_SKA123_F4_XL-p.raw", NativeID:"controllerType=0 controllerNumber=1 scan=5162"
Ska	86	Intra	ska3_S_408:ska3_K_410	ska3_406-413:ska3_406-413	ska3	S	408	ska3	K	410	DVSNKEN	406-413	DVSNKEN	406-413	28	0.01910828025477707	2568772894490640	TRUE	SKA123_F07.zhrm.csv	20171201_Q3_U3_1-10_AB_SA_PJH_20171117_SKA123_F7_XL-p.5812.5812.3 File:"20171201_Q3_U3_1-10_AB_SA_PJH_20171117_SKA123_F7_XL-p.raw", NativeID:"controllerType=0 controllerNumber=1 scan=5812"
Ska	87	Intra	ska3_K_410:ska3_K_10	ska3_406-413:ska3_6-12	ska3	K	410	ska3	K	10	DVSNKEN	406-413	SFBGKLR	6-12	81	0.0	1.61561e+16	TRUE	SKA123_F07.zhrm.csv	20171201_Q3_U3_1-10_AB_SA_PJH_20171117_SKA123_F7_XL-p.8883.8883.3 File:"20171201_Q3_U3_1-10_AB_SA_PJH_20171117_SKA123_F7_XL-p.raw", NativeID:"controllerType=0 controllerNumber=1 scan=8883"
Ska	88	Intra	ska3_K_410:ska3_S_16	ska3_406-413:ska3_13-24	ska3	K	410	ska3	S	16	DVSNKEN	406-413	SLASTLDBETAR	13-24	39	0.0	2.99111e+16	TRUE	SKA123_F06.zhrm.csv	20171201_Q3_U3_1-2_AB_SA_PJH_20171117_SKA123_F6_XL-p.11203.11203.3 File:"20171201_Q3_U3_1-2_AB_SA_PJH_20171117_SKA123_F6_XL-p.raw", NativeID:"controllerType=0 controllerNumber=1 scan=11203"
Ska	89	Intra	ska3_K_410:ska3_T_22	ska3_406-413:ska3_13-24	ska3	K	410	ska3	T	22	DVSNKEN	406-413	SLASTLDBETAR	13-24	27	0.025157232704402517	2.36081e+16	TRUE	SKA123_F06.zhrm.csv	20171201_Q3_U3_1-2_AB_SA_PJH_20171117_SKA123_F6_XL-p.12650.12650.3 File:"20171201_Q3_U3_1-2_AB_SA_PJH_20171117_SKA123_F6_XL-p.raw", NativeID:"controllerType=0 controllerNumber=1 scan=12650"
Ska	90	Intra	ska3_K_410:ska3_K_80	ska3_406-413:ska3_78-85	ska3	K	410	ska3	K	80	DVSNKEN	406-413	ATKVLMEK	78-85	88	0.0	2.13541e+16	TRUE	SKA123_F06.zhrm.csv	20171201_Q3_U3_1-2_AB_SA_PJH_20171117_SKA123_F6_XL-p.9277.9277.3 File:"20171201_Q3_U3_1-2_AB_SA_PJH_20171117_SKA123_F6_XL-p.raw", NativeID:"controllerType=0 controllerNumber=1 scan=9277"
Ska	91	Intra	ska3_K_410:ska3_K_92	ska3_406-413:ska3_86-94	ska3	K	410	ska3	K	92	DVSNKEN	406-413	NSMDIMKIR	86-94	69	0.0	2.91337e+16	TRUE	SKA123_F07.zhrm.csv	20171201_Q3_U3_1-10_AB_SA_PJH_20171117_SKA123_F7_XL-p.13819.13819.3 File:"20171201_Q3_U3_1-10_AB_SA_PJH_20171117_SKA123_F7_XL-p.raw", NativeID:"controllerType=0 controllerNumber=1 scan=13819"
Ska	92	Intra	ska3_K_410:ska3_K_99	ska3_406-413:ska3_95-105	ska3	K	410	ska3	K	99	DVSNKEN	406-413	EYFQKYGYSPR	95-105	52	0.0	2.50888e+16	TRUE	SKA123_F06.zhrm.csv	20171201_Q3_U3_1-2_AB_SA_PJH_20171117_SKA123_F6_XL-p.13775.13775.3 File:"20171201_Q3_U3_1-2_AB_SA_PJH_20171117_SKA123_F6_XL-p.raw", NativeID:"controllerType=0 controllerNumber=1 scan=13775"
Ska	93	Intra	ska3_K_410:ska3_S_145	ska3_406-413:ska3_136-154	ska3	K	410	ska3	S	145	DVSNKEN	406-413	DDLSDPPVASSBISEKSPR	136-154	22	0.02590673575129533	0.19853896322556594	TRUE	SKA123_F07.zhrm.csv	20171201_Q3_U3_1-10_AB_SA_PJH_20171117_SKA123_F7_XL-p.13546.13546.3 File:"20171201_Q3_U3_1-10_AB_SA_PJH_20171117_SKA123_F7_XL-p.raw", NativeID:"controllerType=0 controllerNumber=1 scan=13546"
Ska	94	Intra	ska3_K_410:ska3_S_155	ska3_406-413:ska3_155-165	ska3	K	410	ska3	S	155	DVSNKEN	406-413	SPQLSDFGLER	155-165	35	0.0	4752047960328050	TRUE	SKA123_F08.zhrm.csv	20171201_Q3_U3_1-2_AB_SA_PJH_20171117_SKA123_F8_XL-p.16872.16872.3 File:"20171201_Q3_U3_1-2_AB_SA_PJH_20171117_SKA123_F8_XL-p.raw", NativeID:"controllerType=0 controllerNumber=1 scan=16872"
Ska	95	Intra	ska3_K_410:ska3_K_247	ska3_406-413:ska3_245-257	ska3	K	410	ska3	K	247	DVSNKEN	406-413	NNKSEEAIDTESR	245-257	120	0.0	1.53963e+16	TRUE	SKA123_F08.zhrm.csv	20171201_Q3_U3_1-2_AB_SA_PJH_20171117_SKA123_F8_XL-p.5625.5625.3 File:"20171201_Q3_U3_1-2_AB_SA_PJH_20171117_SKA123_F8_XL-p.raw", NativeID:"controllerType=0 controllerNumber=1 scan=5625"
Ska	96	Intra	ska3_K_410:ska3_K_399	ska3_406-413:ska3_397-405	ska3	K	410	ska3	K	399	DVSNKEN	406-413	FLKHGQNIR	397-405	63	0.0	2.28442e+16	TRUE	SKA123_F07.zhrm.csv	20171201_Q3_U3_1-10_AB_SA_PJH_20171117_SKA123_F7_XL-p.6145.6145.3 File:"20171201_Q3_U3_1-10_AB_SA_PJH_20171117_SKA123_F7_XL-p.raw", NativeID:"controllerType=0 controllerNumber=1 scan=6145"
Ska	97	Intra	ska3_K_410:ska3_K_410	ska3_406-413:ska3_406-413	ska3	K	410	ska3	K	410	DVSNKEN	406-413	DVSNKEN	406-413	139	0.0	1.35378e+16	TRUE	SKA123_F08.zhrm.csv	20171201_Q3_U3_1-2_AB_SA_PJH_20171117_SKA123_F8_XL-p.4839.4839.3 File:"20171201_Q3_U3_1-2_AB_SA_PJH_20171117_SKA123_F8_XL-p.raw", NativeID:"controllerType=0 controllerNumber=1 scan=4839"
Ska:Ndc80	1	Inter	NDC80_T_61:NUF2_K_400	NDC80_61-67:NUF2_391-402	NDC80	T	61	NUF2	K	400	TSGHGSR	61-67	VTTINQEIQKIK	391-402	53	0.041446208112874784	0.41257985851611984	TRUE	PJH_20180309_ND80SKA123_R2F4-11_RISE_MaxMissFrag1.zhrm.csv	20180321_Q3_U2_1-2_AB_SA_PJH_20180309_ND80SKA123_R2F6.11592.11592.3 File:"20180321_Q3_U2_1-2_AB_SA_PJH_20180309_ND80SKA123_R2F6.raw", NativeID:"controllerType=0 controllerNumber=1 scan=11592"
Ska:Ndc80	2	Inter	NDC80_K_288:NUF2_K_165	NDC80_287-292:NUF2_152-168	NDC80	K	288	NUF2	K	165	EKEPNR	287-292	mQQLNAAHQEALMKLER	152-168	75	0.0074487895716946	1.81883e+16	TRUE	PJH_20180309_ND80SKA123_R2F4-11_RISE_MaxMissFrag1.zhrm.csv	20180321_Q3_U2_1-10_AB_SA_PJH_20180309_ND80SKA123_R2F7.13326.13326.5 File:"20180321_Q3_U2_1-10_AB_SA_PJH_20180309_ND80SKA123_R2F7.raw", NativeID:"controllerType=0 controllerNumber=1 scan=13326"
Ska:Ndc80	3	Inter	NDC80_K_577:NUF2_K_400	NDC80_577-584:NUF2_391-402	NDC80	K	577	NUF2	K	400	KVGNNLQR	577-584	VTTINQEIQKIK	391-402	87	0.0014981273408239699	1.3613e+16	TRUE	PJH_20180309_ND80SKA123_R2F4-11_RISE_MaxMissFrag1.zhrm.csv	20180321_Q3_U2_1-10_AB_SA_PJH_20180309_ND80SKA123_R2F7.15284.15284.3 File:"20180321_Q3_U2_1-10_AB_SA_PJH_20180309_ND80SKA123_R2F7.raw", NativeID:"controllerType=0 controllerNumber=1 scan=15284"
Ska:Ndc80	4	Inter	NDC80_K_577:NUF2_K_409	NDC80_577-584:NUF2_403-414	NDC80	K	577	NUF2	K	409	KVGNNLQR	577-584	LGIQQLKDAAER	403-414	128	0.0	0.4477399934426628	TRUE	PJH_20180309_ND80SKA123_R2F4-11_RISE_MaxMissFrag1.zhrm.csv	20180321_Q3_U2_1-2_AB_SA_PJH_20180309_ND80SKA123_R2F6.19413.19413.4 File:"20180321_Q3_U2_1-2_AB_SA_PJH_20180309_ND80SKA123_R2F6.raw", NativeID:"controllerType=0 controllerNumber=1 scan=19413"
Ska:Ndc80	5	Inter	NDC80_K_577:NUF2_S_419	NDC80_577-584:NUF2_419-432	NDC80	K	577	NUF2	S	419	KVGNNLQR	577-584	SQEIFLNLKTALEK	419-432	81	0.005486968449931413	2.13831e+16	TRUE	PJH_20180309_ND80SKA123_R2F4-11_RISE_MaxMissFrag1.zhrm.csv	20180321_Q3_U2_1-2_AB_SA_PJH_20180309_ND80SKA123_R2F6.25502.25502.4 File:"20180321_Q3_U2_1-2_AB_SA_PJH_20180309_ND80SKA123_R2F6.raw", NativeID:"controllerType=0 controllerNumber=1 scan=25502"
Ska:Ndc80	6	Inter	NDC80_K_577:NUF2_K_427	NDC80_577-584:NUF2_419-432	NDC80	K	577	NUF2	K	427	KVGNNLQR	577-584	SQEIFLNLKTALEK	419-432	118	0.001996007984031936	1.21189e+16	TRUE	PJH_20180309_ND80SKA123_R2F4-11_RISE_MaxMissFrag1.zhrm.csv	20180321_Q3_U2_1-10_AB_SA_PJH_20180309_ND80SKA123_R2F7.25691.25691.4 File:"20180321_Q3_U2_1-10_AB_SA_PJH_20180309_ND80SKA123_R2F7.raw", NativeID:"controllerType=0 controllerNumber=1 scan=25691"
Ska:Ndc80	7	Inter	NDC80_K_577:NUF2_T_428	NDC80_577-584:NUF2_419-432	NDC80	K	577	NUF2	T	428	KVGNNLQR	577-584	SQEIFLNLKTALEK	419-432	85	0.0028922631959508315	1.66787e+16	TRUE	PJH_20180309_ND80SKA123_R2F4-11_RISE_MaxMissFrag1.zhrm.csv	20180321_Q3_U2_1-10_AB_SA_PJH_20180309_ND80SKA123_R2F7.25681.25681.3 File:"20180321_Q3_U2_1-10_AB_SA_PJH_20180309_ND80SKA123_R2F7.raw", NativeID:"controllerType=0 controllerNumber=1 scan=25681"
Ska:Ndc80	8	Inter	NDC80_S_8:SKA3_K_399	NDC80_4-13:SKA3_397-405	NDC80	S	8	SKA3	K	399	SSVSSGGAGR	4-13	FLKHGQNIR	397-405	70	0.015463917525773196	1.7371e+16	TRUE	PJH_20180309_ND80SKA123_R2F4-11_RISE_MaxMissFrag1.zhrm.csv	20180321_Q3_U2_1-2_AB_SA_PJH_20180309_ND80SKA123_R2F6.9131.9131.3 File:"20180321_Q3_U2_1-2_AB_SA_PJH_20180309_ND80SKA123_R2F6.raw", NativeID:"controllerType=0 controllerNumber=1 scan=9131"
Ska:Ndc80	9	Inter	NDC80_S_66:SKA3_K_399	NDC80_61-67:SKA3_397-405	NDC80	S	66	SKA3	K	399	TSGHGSR	61-67	FLKHGQNIR	397-405	117	0.0019157088122605363	1.52235e+16	TRUE	PJH_20180309_ND80SKA123_R2F4-11_RISE_MaxMissFrag1.zhrm.csv	20180321_Q3_U2_1-2_AB_SA_PJH_20180309_ND80SKA123_R2F6.5335.5335.4 File:"20180321_Q3_U2_1-2_AB_SA_PJH_20180309_ND80SKA123_R2F6.raw", NativeID:"controllerType=0 controllerNumber=1 scan=5335"
Ska:Ndc80	10	Inter	NDC80_K_288:SKA3_S_408	NDC80_287-292:SKA3_406-413	NDC80	K	288	SKA3	S	408	EKEPNR	287-292	DVSNKEN	406-413	82	0.0041753653444676405	0.9424412439487622	TRUE	PJH_20180309_ND80SKA123_R2F4-11_RISE_MaxMissFrag1.zhrm.csv	20180321_Q3_U2_1-2_AB_SA_PJH_20180309_ND80SKA123_R2F6.5442.5442.2 File:"20180321_Q3_U2_1-2_AB_SA_PJH_20180309_ND80SKA123_R2F6.raw", NativeID:"controllerType=0 controllerNumber=1 scan=5442"
Ska:Ndc80	11	Inter	NDC80_K_504:SKA3_K_247	NDC80_502-509:SKA3_245-257	NDC80	K	504	SKA3	K	247	TLKEEVQK	502-509	NNKSEEAIDTESR	245-257	120	0.0	1.4345e+16	TRUE	PJH_20180309_ND80SKA123_R2F4-11_RISE_MaxMissFrag1.zhrm.csv	20180321_Q3_U2_1-10_AB_SA_PJH_20180309_ND80SKA123_R2F7.10627.10627.3 File:"20180321_Q3_U2_1-10_AB_SA_PJH_20180309_ND80SKA123_R2F7.raw", NativeID:"controllerType=0 controllerNumber=1 scan=10627"
Ska:Ndc80	12	Inter	NDC80_K_577:SKA3_K_247	NDC80_577-584:SKA3_245-257	NDC80	K	577	SKA3	K	247	KVGNNLQR	577-584	NNKSEEAIDTESR	245-257	77	0.00707850707850708	4564261833566470	TRUE	PJH_20180309_ND80SKA123_R2F4-11_RISE_MaxMissFrag1.zhrm.csv	20180321_Q3_U2_1-10_AB_SA_PJH_20180309_ND80SKA123_R2F7.8524.8524.3 File:"20180321_Q3_U2_1-10_AB_SA_PJH_20180309_ND80SKA123_R2F7.raw", NativeID:"controllerType=0 controllerNumber=1 scan=8524"
Ska:Ndc80	13	Inter	NDC80_K_577:SKA3_K_399	NDC80_577-584:SKA3_397-405	NDC80	K	577	SKA3	K	399	KVGNNLQR	577-584	FLKHGQNIR	397-405	56	0.033850493653032436	0.991363037645558	TRUE	PJH_20180309_ND80SKA123_R2F4-11_RISE_MaxMissFrag1.zhrm.csv	20180321_Q3_U2_1-2_AB_SA_PJH_20180309_ND80SKA123_R2F6.9400.9400.3 File:"20180321_Q3_U2_1-2_AB_SA_PJH_20180309_ND80SKA123_R2F6.raw", NativeID:"controllerType=0 controllerNumber=1 scan=9400"
Ska:Ndc80	14	Inter	NDC80_K_638:SPC24_K_50	NDC80_634-643:SPC24_41-53	NDC80	K	638	SPC24	K	50	ATLIKSSEE	634-643	LLETQDGAEKQLR	41-53	170	0.0	2.80403e+16	TRUE	PJH_20180309_ND80SKA123_R2F4-11_RISE_MaxMissFrag1.zhrm.csv	20180321_Q3_U2_1-2_AB_SA_PJH_20180309_ND80SKA123_R2F8.15111.15111.2 File:"20180321_Q3_U2_1-2_AB_SA_PJH_20180309_ND80SKA123_R2F8.raw", NativeID:"controllerType=0 controllerNumber=1 scan=15111"
Ska:Ndc80	15	Inter	NDC80_S_5:SPC25_6HIS_K_216	NDC80_4-13:SPC25_6HIS_216-231	NDC80	S	5	SPC25_6HIS	K	216	SSVSSGGAGR	4-13	KAFTATVYNHHHHHH	216-231	69	0.015927189988623434	0.33436630166491604	TRUE	PJH_20180309_ND80SKA123_R2F4-11_RISE_MaxMissFrag1.zhrm.csv	20180321_Q3_U2_1-2_AB_SA_PJH_20180309_ND80SKA123_R2F6.5860.5860.4 File:"20180321_Q3_U2_1-2_AB_SA_PJH_20180309_ND80SKA123_R2F6.raw", NativeID:"controllerType=0 controllerNumber=1 scan=5860"
Ska:Ndc80	16	Inter	NDC80_K_577:SPC25_6HIS_{_-1	NDC80_577-584:SPC25_6HIS_0-11	NDC80	K	577	SPC25_6HIS	{	1	KVGNNLQR	577-584	mVEDELALFDK	0-11	54	0.04041780199818347	1.18514e+16	TRUE	PJH_20180309_ND80SKA123_R2F4-11_RISE_MaxMissFrag1.zhrm.csv	20180321_Q3_U2_1-2_AB_SA_PJH_20180309_ND80SKA123_R2F8.21794.21794.3 File:"20180321_Q3_U2_1-2_AB_SA_PJH_20180309_ND80SKA123_R2F8.raw", NativeID:"controllerType=0 controllerNumber=1 scan=21794"
Ska:Ndc80	17	Inter	NDC80_K_606:SPC25_6HIS_K_21	NDC80_599-609:SPC25_6HIS_20-33	NDC80	K	606	SPC25_6HIS	K	21	HLEEQIAKVDR	599-609	FKSTDTSBQMAGLR	20-33	69	0.015927189988623434	0.5995334009053188	TRUE	PJH_20180309_ND80SKA123_R2F4-11_RISE_MaxMissFrag1.zhrm.csv	20180321_Q3_U2_1-10_AB_SA_PJH_20180309_ND80SKA123_R2F7.15905.15905.4 File:"20180321_Q3_U2_1-10_AB_SA_PJH_20180309_ND80SKA123_R2F7.raw", NativeID:"controllerType=0 controllerNumber=1 scan=15905"
Ska:Ndc80	18	Inter	NDC80_K_629:SPC25_6HIS_K_37	NDC80_628-632:SPC25_6HIS_34-41	NDC80	K	629	SPC25_6HIS	K	37	DKYEK	628-632	DTYKDSIK	34-41	96	0.00186219739292365	1.60186e+16	TRUE	PJH_20180309_ND80SKA123_R2F4-11_RISE_MaxMissFrag1.zhrm.csv	20180321_Q3_U2_1-2_AB_SA_PJH_20180309_ND80SKA123_R2F6.10959.10959.2 File:"20180321_Q3_U2_1-2_AB_SA_PJH_20180309_ND80SKA123_R2F6.raw", NativeID:"controllerType=0 controllerNumber=1 scan=10959"
Ska:Ndc80	19	Inter	NDC80_K_629:SPC25_6HIS_K_41	NDC80_628-632:SPC25_6HIS_38-46	NDC80	K	629	SPC25_6HIS	K	41	DKYEK	628-632	DSIKAFAEK	38-46	160	0.0	0.35269137026999936	TRUE	PJH_20180309_ND80SKA123_R2F4-11_RISE_MaxMissFrag1.zhrm.csv	20180321_Q3_U2_1-2_AB_SA_PJH_20180309_ND80SKA123_R2F6.14657.14657.2 File:"20180321_Q3_U2_1-2_AB_SA_PJH_20180309_ND80SKA123_R2F6.raw", NativeID:"controllerType=0 controllerNumber=1 scan=14657"
Ska:Ndc80	20	Inter	NDC80_K_629:SPC25_6HIS_K_52	NDC80_628-632:SPC25_6HIS_51-56	NDC80	K	629	SPC25_6HIS	K	52	DKYEK	628-632	LKEEER	51-56	120	0.0	0.3277697696367862	TRUE	PJH_20180309_ND80SKA123_R2F4-11_RISE_MaxMissFrag1.zhrm.csv	20180321_Q3_U2_1-2_AB_SA_PJH_20180309_ND80SKA123_R2F6.6226.6226.3 File:"20180321_Q3_U2_1-2_AB_SA_PJH_20180309_ND80SKA123_R2F6.raw", NativeID:"controllerType=0 controllerNumber=1 scan=6226"
Ska:Ndc80	21	Inter	NDC80_K_633:SPC25_6HIS_K_52	NDC80_633-638:SPC25_6HIS_51-56	NDC80	K	633	SPC25_6HIS	K	52	KATLIK	633-638	LKEEER	51-56	134	0.0	1.04747e+16	TRUE	PJH_20180309_ND80SKA123_R2F4-11_RISE_MaxMissFrag1.zhrm.csv	20180321_Q3_U2_1-10_AB_SA_PJH_20180309_ND80SKA123_R2F7.7865.7865.3 File:"20180321_Q3_U2_1-10_AB_SA_PJH_20180309_ND80SKA123_R2F7.raw", NativeID:"controllerType=0 controllerNumber=1 scan=7865"
Ska:Ndc80	22	Inter	NDC80_K_638:SPC25_6HIS_K_73	NDC80_634-643:SPC25_6HIS_71-78	NDC80	K	638	SPC25_6HIS	K	73	ATLIKSSEE	634-643	QNKLIQEK	71-78	136	0.0	2.67321e+16	TRUE	PJH_20180309_ND80SKA123_R2F4-11_RISE_MaxMissFrag1.zhrm.csv	20180321_Q3_U2_1-10_AB_SA_PJH_20180309_ND80SKA123_R2F7.14736.14736.2 File:"20180321_Q3_U2_1-10_AB_SA_PJH_20180309_ND80SKA123_R2F7.raw", NativeID:"controllerType=0 controllerNumber=1 scan=14736"
Ska:Ndc80	23	Inter	NDC80_S_640:SPC25_6HIS_K_73	NDC80_634-643:SPC25_6HIS_71-78	NDC80	S	640	SPC25_6HIS	K	73	ATLIKSSEE	634-643	QNKLIQEK	71-78	78	0.006510416666666667	4.1591e+16	TRUE	PJH_20180309_ND80SKA123_R2F4-11_RISE_MaxMissFrag1.zhrm.csv	20180321_Q3_U2_1-2_AB_SA_PJH_20180309_ND80SKA123_R2F6.15848.15848.3 File:"20180321_Q3_U2_1-2_AB_SA_PJH_20180309_ND80SKA123_R2F6.raw", NativeID:"controllerType=0 controllerNumber=1 scan=15848"
Ska:Ndc80	24	Inter	NUF2_K_219:NDC80_T_350	NUF2_214-221:NDC80_338-351	NUF2	K	219	NDC80	T	350	SNISEKTK	214-221	VELEBETIKQENTR	338-351	73	0.010228640192539109	1.96523e+16	TRUE	PJH_20180309_ND80SKA123_R2F4-11_RISE_MaxMissFrag1.zhrm.csv	20180321_Q3_U2_1-10_AB_SA_PJH_20180309_ND80SKA123_R2F7.12352.12352.4 File:"20180321_Q3_U2_1-10_AB_SA_PJH_20180309_ND80SKA123_R2F7.raw", NativeID:"controllerType=0 controllerNumber=1 scan=12352"
Ska:Ndc80	25	Inter	NUF2_K_243:NDC80_K_360	NUF2_242-250:NDC80_352-368	NUF2	K	243	NDC80	K	360	TKIVDSPEK	242-250	LQNIIDNQKYSVADIER	352-368	115	0.001763668430335097	4297719370293170	TRUE	PJH_20180309_ND80SKA123_R2F4-11_RISE_MaxMissFrag1.zhrm.csv	20180321_Q3_U2_1-2_AB_SA_PJH_20180309_ND80SKA123_R2F8.18087.18087.4 File:"20180321_Q3_U2_1-2_AB_SA_PJH_20180309_ND80SKA123_R2F8.raw", NativeID:"controllerType=0 controllerNumber=1 scan=18087"
Ska:Ndc80	26	Inter	NUF2_K_243:NDC80_S_362	NUF2_242-250:NDC80_352-368	NUF2	K	243	NDC80	S	362	TKIVDSPEK	242-250	LQNIIDNQKYSVADIER	352-368	113	0.001658374792703151	3.69116e+16	TRUE	PJH_20180309_ND80SKA123_R2F4-11_RISE_MaxMissFrag1.zhrm.csv	20180321_Q3_U2_1-2_AB_SA_PJH_20180309_ND80SKA123_R2F8.18065.18065.3 File:"20180321_Q3_U2_1-2_AB_SA_PJH_20180309_ND80SKA123_R2F8.raw", NativeID:"controllerType=0 controllerNumber=1 scan=18065"
Ska:Ndc80	27	Inter	NUF2_S_247:NDC80_K_346	NUF2_242-250:NDC80_338-351	NUF2	S	247	NDC80	K	346	TKIVDSPEK	242-250	VELEBETIKQENTR	338-351	68	0.016138007790762382	2072603254472350	TRUE	PJH_20180309_ND80SKA123_R2F4-11_RISE_MaxMissFrag1.zhrm.csv	20180321_Q3_U2_1-2_AB_SA_PJH_20180309_ND80SKA123_R2F8.11970.11970.4 File:"20180321_Q3_U2_1-2_AB_SA_PJH_20180309_ND80SKA123_R2F8.raw", NativeID:"controllerType=0 controllerNumber=1 scan=11970"
Ska:Ndc80	28	Inter	NUF2_K_266:NDC80_T_384	NUF2_265-269:NDC80_374-385	NUF2	K	266	NDC80	T	384	LKNAR	265-269	NELQQTINKLTK	374-385	74	0.009785932721712538	2211591167721860	TRUE	PJH_20180309_ND80SKA123_R2F4-11_RISE_MaxMissFrag1.zhrm.csv	20180321_Q3_U2_1-10_AB_SA_PJH_20180309_ND80SKA123_R2F7.18706.18706.4 File:"20180321_Q3_U2_1-10_AB_SA_PJH_20180309_ND80SKA123_R2F7.raw", NativeID:"controllerType=0 controllerNumber=1 scan=18706"
Ska:Ndc80	29	Inter	NUF2_K_299:NDC80_K_462	NUF2_299-307:NDC80_455-474	NUF2	K	299	NDC80	K	462	KIQDLSDNR	299-307	AQVYVPLKELLNETEEEINK	455-474	127	0.0	1.63224e+16	TRUE	PJH_20180309_ND80SKA123_R2F4-11_RISE_MaxMissFrag1.zhrm.csv	20180321_Q3_U2_1-2_AB_SA_PJH_20180309_ND80SKA123_R2F8.30200.30200.3 File:"20180321_Q3_U2_1-2_AB_SA_PJH_20180309_ND80SKA123_R2F8.raw", NativeID:"controllerType=0 controllerNumber=1 scan=30200"
Ska:Ndc80	30	Inter	NUF2_K_299:NDC80_T_468	NUF2_299-307:NDC80_455-474	NUF2	K	299	NDC80	T	468	KIQDLSDNR	299-307	AQVYVPLKELLNETEEEINK	455-474	108	0.0013605442176870747	3.57183e+16	TRUE	PJH_20180309_ND80SKA123_R2F4-11_RISE_MaxMissFrag1.zhrm.csv	20180321_Q3_U2_1-10_AB_SA_PJH_20180309_ND80SKA123_R2F7.33709.33709.3 File:"20180321_Q3_U2_1-10_AB_SA_PJH_20180309_ND80SKA123_R2F7.raw", NativeID:"controllerType=0 controllerNumber=1 scan=33709"
Ska:Ndc80	31	Inter	NUF2_K_309:NDC80_T_468	NUF2_308-315:NDC80_455-474	NUF2	K	309	NDC80	T	468	EKLASILK	308-315	AQVYVPLKELLNETEEEINK	455-474	55	0.03744798890429958	1696197757942580	TRUE	PJH_20180309_ND80SKA123_R2F4-11_RISE_MaxMissFrag1.zhrm.csv	20180321_Q3_U2_1-2_AB_SA_PJH_20180309_ND80SKA123_R2F8.31794.31794.4 File:"20180321_Q3_U2_1-2_AB_SA_PJH_20180309_ND80SKA123_R2F8.raw", NativeID:"controllerType=0 controllerNumber=1 scan=31794"
Ska:Ndc80	32	Inter	NUF2_K_348:NDC80_K_504	NUF2_344-349:NDC80_502-509	NUF2	K	348	NDC80	K	504	LMIVKK	344-349	TLKEEVQK	502-509	112	0.0016181229773462786	1.36166e+16	TRUE	PJH_20180309_ND80SKA123_R2F4-11_RISE_MaxMissFrag1.zhrm.csv	20180321_Q3_U2_1-10_AB_SA_PJH_20180309_ND80SKA123_R2F7.13194.13194.4 File:"20180321_Q3_U2_1-10_AB_SA_PJH_20180309_ND80SKA123_R2F7.raw", NativeID:"controllerType=0 controllerNumber=1 scan=13194"
Ska:Ndc80	33	Inter	NUF2_K_349:NDC80_K_504	NUF2_344-349:NDC80_502-509	NUF2	K	349	NDC80	K	504	LmIVKK	344-349	TLKEEVQK	502-509	106	0.0024509803921568627	0.5719650912234912	TRUE	PJH_20180309_ND80SKA123_R2F4-11_RISE_MaxMissFrag1.zhrm.csv	20180321_Q3_U2_1-10_AB_SA_PJH_20180309_ND80SKA123_R2F7.11837.11837.4 File:"20180321_Q3_U2_1-10_AB_SA_PJH_20180309_ND80SKA123_R2F7.raw", NativeID:"controllerType=0 controllerNumber=1 scan=11837"
Ska:Ndc80	34	Inter	NUF2_K_400:NDC80_Y_564	NUF2_391-402:NDC80_563-575	NUF2	K	400	NDC80	Y	564	VTTINQEIQKIK	391-402	EYQLVVQTTTEER	563-575	68	0.016138007790762382	1.95454e+16	TRUE	PJH_20180309_ND80SKA123_R2F4-11_RISE_MaxMissFrag1.zhrm.csv	20180321_Q3_U2_1-2_AB_SA_PJH_20180309_ND80SKA123_R2F8.19837.19837.2 File:"20180321_Q3_U2_1-2_AB_SA_PJH_20180309_ND80SKA123_R2F8.raw", NativeID:"controllerType=0 controllerNumber=1 scan=19837"
Ska:Ndc80	35	Inter	NUF2_K_400:NDC80_T_572	NUF2_391-402:NDC80_563-575	NUF2	K	400	NDC80	T	572	VTTINQEIQKIK	391-402	EYQLVVQTTTEER	563-575	115	0.001763668430335097	1.78978e+16	TRUE	PJH_20180309_ND80SKA123_R2F4-11_RISE_MaxMissFrag1.zhrm.csv	20180321_Q3_U2_1-10_AB_SA_PJH_20180309_ND80SKA123_R2F7.23418.23418.3 File:"20180321_Q3_U2_1-10_AB_SA_PJH_20180309_ND80SKA123_R2F7.raw", NativeID:"controllerType=0 controllerNumber=1 scan=23418"
Ska:Ndc80	36	Inter	NUF2_K_227:SKA3_T_254	NUF2_223-234:SKA3_245-257	NUF2	K	227	SKA3	T	254	LNELKLSVVSLK	223-234	NNKSEEAIDTESR	245-257	60	0.027902341803687097	2.06959e+16	TRUE	PJH_20180309_ND80SKA123_R2F4-11_RISE_MaxMissFrag1.zhrm.csv	20180321_Q3_U2_1-2_AB_SA_PJH_20180309_ND80SKA123_R2F8.18661.18661.4 File:"20180321_Q3_U2_1-2_AB_SA_PJH_20180309_ND80SKA123_R2F8.raw", NativeID:"controllerType=0 controllerNumber=1 scan=18661"
Ska:Ndc80	37	Inter	NUF2_K_266:SKA3_K_247	NUF2_265-269:SKA3_245-257	NUF2	K	266	SKA3	K	247	LKNAR	265-269	NNKSEEAIDTESR	245-257	61	0.025290844714213456	0.25686462778228264	TRUE	PJH_20180309_ND80SKA123_R2F4-11_RISE_MaxMissFrag1.zhrm.csv	20180321_Q3_U2_1-10_AB_SA_PJH_20180309_ND80SKA123_R2F7.7098.7098.3 File:"20180321_Q3_U2_1-10_AB_SA_PJH_20180309_ND80SKA123_R2F7.raw", NativeID:"controllerType=0 controllerNumber=1 scan=7098"
Ska:Ndc80	38	Inter	NUF2_K_383:SKA3_K_410	NUF2_380-384:SKA3_406-413	NUF2	K	383	SKA3	K	410	VQEKR	380-384	DVSNKEN	406-413	69	0.015927189988623434	2.08114e+16	TRUE	PJH_20180309_ND80SKA123_R2F4-11_RISE_MaxMissFrag1.zhrm.csv	20180321_Q3_U2_1-2_AB_SA_PJH_20180309_ND80SKA123_R2F6.5247.5247.2 File:"20180321_Q3_U2_1-2_AB_SA_PJH_20180309_ND80SKA123_R2F6.raw", NativeID:"controllerType=0 controllerNumber=1 scan=5247"
Ska:Ndc80	39	Inter	NUF2_K_461:SPC24_K_50	NUF2_459-465:SPC24_41-53	NUF2	K	461	SPC24	K	50	MFKMST	459-465	LLETQDGAEKQLR	41-53	167	0.0	2.44402e+16	TRUE	PJH_20180309_ND80SKA123_R2F4-11_RISE_MaxMissFrag1.zhrm.csv	20180321_Q3_U2_1-2_AB_SA_PJH_20180309_ND80SKA123_R2F8.17690.17690.2 File:"20180321_Q3_U2_1-2_AB_SA_PJH_20180309_ND80SKA123_R2F8.raw", NativeID:"controllerType=0 controllerNumber=1 scan=17690"
Ska:Ndc80	40	Inter	NUF2_K_456:SPC25_6HIS_K_21	NUF2_452-457:SPC25_6HIS_20-33	NUF2	K	456	SPC25_6HIS	K	21	TAELKR	452-457	FKSTDTSBQMAGLR	20-33	80	0.006060606060606061	0.4683274525056827	TRUE	PJH_20180309_ND80SKA123_R2F4-11_RISE_MaxMissFrag1.zhrm.csv	20180321_Q3_U2_1-10_AB_SA_PJH_20180309_ND80SKA123_R2F7.13045.13045.3 File:"20180321_Q3_U2_1-10_AB_SA_PJH_20180309_ND80SKA123_R2F7.raw", NativeID:"controllerType=0 controllerNumber=1 scan=13045"
Ska:Ndc80	41	Inter	NUF2_K_456:SPC25_6HIS_S_22	NUF2_452-457:SPC25_6HIS_22-33	NUF2	K	456	SPC25_6HIS	S	22	TAELKR	452-457	STDTSBQMAGLR	22-33	87	0.0014981273408239699	1.13183e+16	TRUE	PJH_20180309_ND80SKA123_R2F4-11_RISE_MaxMissFrag1.zhrm.csv	20180321_Q3_U2_1-10_AB_SA_PJH_20180309_ND80SKA123_R2F7.13415.13415.3 File:"20180321_Q3_U2_1-10_AB_SA_PJH_20180309_ND80SKA123_R2F7.raw", NativeID:"controllerType=0 controllerNumber=1 scan=13415"
Ska:Ndc80	42	Inter	NUF2_K_456:SPC25_6HIS_S_39	NUF2_452-457:SPC25_6HIS_34-41	NUF2	K	456	SPC25_6HIS	S	39	TAELKR	452-457	DTYKDSIK	34-41	78	0.006510416666666667	1.15008e+16	TRUE	PJH_20180309_ND80SKA123_R2F4-11_RISE_MaxMissFrag1.zhrm.csv	20180321_Q3_U2_1-2_AB_SA_PJH_20180309_ND80SKA123_R2F6.11481.11481.3 File:"20180321_Q3_U2_1-2_AB_SA_PJH_20180309_ND80SKA123_R2F6.raw", NativeID:"controllerType=0 controllerNumber=1 scan=11481"
Ska:Ndc80	43	Inter	NUF2_K_456:SPC25_6HIS_K_41	NUF2_452-457:SPC25_6HIS_38-46	NUF2	K	456	SPC25_6HIS	K	41	TAELKR	452-457	DSIKAFAEK	38-46	96	0.00186219739292365	1.19934e+16	TRUE	PJH_20180309_ND80SKA123_R2F4-11_RISE_MaxMissFrag1.zhrm.csv	20180321_Q3_U2_1-10_AB_SA_PJH_20180309_ND80SKA123_R2F7.13524.13524.4 File:"20180321_Q3_U2_1-10_AB_SA_PJH_20180309_ND80SKA123_R2F7.raw", NativeID:"controllerType=0 controllerNumber=1 scan=13524"
Ska:Ndc80	44	Inter	NUF2_K_456:SPC25_6HIS_K_46	NUF2_452-457:SPC25_6HIS_42-50	NUF2	K	456	SPC25_6HIS	K	46	TAELKR	452-457	AFAEKLSVK	42-50	125	0.0	1.19633e+16	TRUE	PJH_20180309_ND80SKA123_R2F4-11_RISE_MaxMissFrag1.zhrm.csv	20180321_Q3_U2_1-2_AB_SA_PJH_20180309_ND80SKA123_R2F6.15241.15241.3 File:"20180321_Q3_U2_1-2_AB_SA_PJH_20180309_ND80SKA123_R2F6.raw", NativeID:"controllerType=0 controllerNumber=1 scan=15241"
Ska:Ndc80	45	Inter	NUF2_K_461:SPC25_6HIS_K_46	NUF2_459-465:SPC25_6HIS_42-50	NUF2	K	461	SPC25_6HIS	K	46	MFKMST	459-465	AFAEKLSVK	42-50	157	0.0	1.35634e+16	TRUE	PJH_20180309_ND80SKA123_R2F4-11_RISE_MaxMissFrag1.zhrm.csv	20180321_Q3_U2_1-10_AB_SA_PJH_20180309_ND80SKA123_R2F7.22657.22657.2 File:"20180321_Q3_U2_1-10_AB_SA_PJH_20180309_ND80SKA123_R2F7.raw", NativeID:"controllerType=0 controllerNumber=1 scan=22657"
Ska:Ndc80	46	Inter	NUF2_K_461:SPC25_6HIS_S_48	NUF2_459-465:SPC25_6HIS_42-50	NUF2	K	461	SPC25_6HIS	S	48	MFKMST	459-465	AFAEKLSVK	42-50	80	0.006060606060606061	1.18744e+16	TRUE	PJH_20180309_ND80SKA123_R2F4-11_RISE_MaxMissFrag1.zhrm.csv	20180321_Q3_U2_1-2_AB_SA_PJH_20180309_ND80SKA123_R2F8.19055.19055.2 File:"20180321_Q3_U2_1-2_AB_SA_PJH_20180309_ND80SKA123_R2F8.raw", NativeID:"controllerType=0 controllerNumber=1 scan=19055"
Ska:Ndc80	47	Inter	NUF2_K_461:SPC25_6HIS_K_52	NUF2_459-465:SPC25_6HIS_51-56	NUF2	K	461	SPC25_6HIS	K	52	MFKMST	459-465	LKEEER	51-56	86	0.0021929824561403508	0.4732202407293271	TRUE	PJH_20180309_ND80SKA123_R2F4-11_RISE_MaxMissFrag1.zhrm.csv	20180321_Q3_U2_1-10_AB_SA_PJH_20180309_ND80SKA123_R2F7.13555.13555.2 File:"20180321_Q3_U2_1-10_AB_SA_PJH_20180309_ND80SKA123_R2F7.raw", NativeID:"controllerType=0 controllerNumber=1 scan=13555"
Ska:Ndc80	48	Inter	SKA1_SORTHIS_S_174:NDC80_K_577	SKA1_SORTHIS_171-175:NDC80_577-584	SKA1_SORTHIS	S	174	NDC80	K	577	AVISK	171-175	KVGNNLQR	577-584	58	0.030873130728412933	0.9237112229541651	TRUE	PJH_20180309_ND80SKA123_R2F4-11_RISE_MaxMissFrag1.zhrm.csv	20180321_Q3_U2_1-2_AB_SA_PJH_20180309_ND80SKA123_R2F6.11760.11760.2 File:"20180321_Q3_U2_1-2_AB_SA_PJH_20180309_ND80SKA123_R2F6.raw", NativeID:"controllerType=0 controllerNumber=1 scan=11760"
Ska:Ndc80	49	Inter	SKA1_SORTHIS_S_174:NUF2_K_409	SKA1_SORTHIS_171-175:NUF2_403-414	SKA1_SORTHIS	S	174	NUF2	K	409	AVISK	171-175	LGIQQLKDAAER	403-414	87	0.0014981273408239699	1568000680559960	TRUE	PJH_20180309_ND80SKA123_R2F4-11_RISE_MaxMissFrag1.zhrm.csv	20180321_Q3_U2_1-10_AB_SA_PJH_20180309_ND80SKA123_R2F7.18523.18523.3 File:"20180321_Q3_U2_1-10_AB_SA_PJH_20180309_ND80SKA123_R2F7.raw", NativeID:"controllerType=0 controllerNumber=1 scan=18523"
Ska:Ndc80	50	Inter	SKA1_SORTHIS_S_174:NUF2_K_427	SKA1_SORTHIS_171-175:NUF2_419-432	SKA1_SORTHIS	S	174	NUF2	K	427	AVISK	171-175	SQEIFLNLKTALEK	419-432	62	0.0257201646090535	1.40533e+16	TRUE	PJH_20180309_ND80SKA123_R2F4-11_RISE_MaxMissFrag1.zhrm.csv	20180321_Q3_U2_1-10_AB_SA_PJH_20180309_ND80SKA123_R2F7.26259.26259.3 File:"20180321_Q3_U2_1-10_AB_SA_PJH_20180309_ND80SKA123_R2F7.raw", NativeID:"controllerType=0 controllerNumber=1 scan=26259"
Ska:Ndc80	51	Inter	SKA1_SORTHIS_K_21:SKA2_K_54	SKA1_SORTHIS_17-22:SKA2_49-56	SKA1_SORTHIS	K	21	SKA2	K	54	IGNIKK	17-22	ELSVIKSR	49-56	81	0.005486968449931413	0.035873991368899766	TRUE	PJH_20180309_ND80SKA123_R2F4-11_RISE_MaxMissFrag1.zhrm.csv	20180321_Q3_U2_1-2_AB_SA_PJH_20180309_ND80SKA123_R2F6.13724.13724.4 File:"20180321_Q3_U2_1-2_AB_SA_PJH_20180309_ND80SKA123_R2F6.raw", NativeID:"controllerType=0 controllerNumber=1 scan=13724"
Ska:Ndc80	52	Inter	SKA1_SORTHIS_K_22:SKA2_S_39	SKA1_SORTHIS_22-27:SKA2_26-41	SKA1_SORTHIS	K	22	SKA2	S	39	KTLSLR	22-27	LEYEIKTNHPDSASEK	26-41	109	0.0014005602240896359	1.99327e+16	TRUE	PJH_20180309_ND80SKA123_R2F4-11_RISE_MaxMissFrag1.zhrm.csv	20180321_Q3_U2_1-2_AB_SA_PJH_20180309_ND80SKA123_R2F6.15326.15326.4 File:"20180321_Q3_U2_1-2_AB_SA_PJH_20180309_ND80SKA123_R2F6.raw", NativeID:"controllerType=0 controllerNumber=1 scan=15326"
Ska:Ndc80	53	Inter	SKA1_SORTHIS_K_22:SKA2_K_48	SKA1_SORTHIS_22-27:SKA2_42-54	SKA1_SORTHIS	K	22	SKA2	K	48	KTLSLR	22-27	NPVTLLKELSVIK	42-54	109	0.0014005602240896359	3.99897e+16	TRUE	PJH_20180309_ND80SKA123_R2F4-11_RISE_MaxMissFrag1.zhrm.csv	20180321_Q3_U2_1-10_AB_SA_PJH_20180309_ND80SKA123_R2F7.30201.30201.4 File:"20180321_Q3_U2_1-10_AB_SA_PJH_20180309_ND80SKA123_R2F7.raw", NativeID:"controllerType=0 controllerNumber=1 scan=30201"
Ska:Ndc80	54	Inter	SKA1_SORTHIS_K_22:SKA2_K_54	SKA1_SORTHIS_22-27:SKA2_49-56	SKA1_SORTHIS	K	22	SKA2	K	54	KTLSLR	22-27	ELSVIKSR	49-56	80	0.006060606060606061	1.50941e+16	TRUE	PJH_20180309_ND80SKA123_R2F4-11_RISE_MaxMissFrag1.zhrm.csv	20180321_Q3_U2_1-10_AB_SA_PJH_20180309_ND80SKA123_R2F7.16084.16084.3 File:"20180321_Q3_U2_1-10_AB_SA_PJH_20180309_ND80SKA123_R2F7.raw", NativeID:"controllerType=0 controllerNumber=1 scan=16084"
Ska:Ndc80	55	Inter	SKA1_SORTHIS_S_25:SKA2_K_54	SKA1_SORTHIS_22-27:SKA2_49-56	SKA1_SORTHIS	S	25	SKA2	K	54	KTLSLR	22-27	ELSVIKSR	49-56	61	0.025290844714213456	0.0864705276418836	TRUE	PJH_20180309_ND80SKA123_R2F4-11_RISE_MaxMissFrag1.zhrm.csv	20180321_Q3_U2_1-10_AB_SA_PJH_20180309_ND80SKA123_R2F5.15506.15506.3 File:"20180321_Q3_U2_1-10_AB_SA_PJH_20180309_ND80SKA123_R2F5.raw", NativeID:"controllerType=0 controllerNumber=1 scan=15506"
Ska:Ndc80	56	Inter	SKA1_SORTHIS_K_21:SKA3_K_10	SKA1_SORTHIS_17-22:SKA3_6-12	SKA1_SORTHIS	K	21	SKA3	K	10	IGNIKK	17-22	SFBGKLR	6-12	129	0.0	1.42909e+16	TRUE	PJH_20180309_ND80SKA123_R2F4-11_RISE_MaxMissFrag1.zhrm.csv	20180321_Q3_U2_1-2_AB_SA_PJH_20180309_ND80SKA123_R2F6.12460.12460.4 File:"20180321_Q3_U2_1-2_AB_SA_PJH_20180309_ND80SKA123_R2F6.raw", NativeID:"controllerType=0 controllerNumber=1 scan=12460"
Ska:Ndc80	57	Inter	SKA1_SORTHIS_K_21:SKA3_S_13	SKA1_SORTHIS_17-22:SKA3_13-24	SKA1_SORTHIS	K	21	SKA3	S	13	IGNIKK	17-22	SLASTLDBETAR	13-24	89	0.001564945226917058	0.7275846276861992	TRUE	PJH_20180309_ND80SKA123_R2F4-11_RISE_MaxMissFrag1.zhrm.csv	20180321_Q3_U2_1-2_AB_SA_PJH_20180309_ND80SKA123_R2F6.14117.14117.4 File:"20180321_Q3_U2_1-2_AB_SA_PJH_20180309_ND80SKA123_R2F6.raw", NativeID:"controllerType=0 controllerNumber=1 scan=14117"
Ska:Ndc80	58	Inter	SKA1_SORTHIS_K_21:SKA3_T_22	SKA1_SORTHIS_17-22:SKA3_13-24	SKA1_SORTHIS	K	21	SKA3	T	22	IGNIKK	17-22	SLASTLDBETAR	13-24	100	0.002070393374741201	1.16384e+16	TRUE	PJH_20180309_ND80SKA123_R2F4-11_RISE_MaxMissFrag1.zhrm.csv	20180321_Q3_U2_1-10_AB_SA_PJH_20180309_ND80SKA123_R2F7.12659.12659.4 File:"20180321_Q3_U2_1-10_AB_SA_PJH_20180309_ND80SKA123_R2F7.raw", NativeID:"controllerType=0 controllerNumber=1 scan=12659"
Ska:Ndc80	59	Inter	SKA1_SORTHIS_K_22:SKA3_Y_39	SKA1_SORTHIS_22-27:SKA3_28-42	SKA1_SORTHIS	K	22	SKA3	Y	39	KTLSLR	22-27	ALDGEESDFEDYPMR	28-42	89	0.001564945226917058	2.45956e+16	TRUE	PJH_20180309_ND80SKA123_R2F4-11_RISE_MaxMissFrag1.zhrm.csv	20180321_Q3_U2_1-2_AB_SA_PJH_20180309_ND80SKA123_R2F8.19575.19575.4 File:"20180321_Q3_U2_1-2_AB_SA_PJH_20180309_ND80SKA123_R2F8.raw", NativeID:"controllerType=0 controllerNumber=1 scan=19575"
Ska:Ndc80	60	Inter	SKA1_SORTHIS_K_170:SKA3_S_248	SKA1_SORTHIS_167-175:SKA3_245-257	SKA1_SORTHIS	K	170	SKA3	S	248	EINKAVISK	167-175	NNKSEEAIDTESR	245-257	78	0.006510416666666667	0.9522168307348244	TRUE	PJH_20180309_ND80SKA123_R2F4-11_RISE_MaxMissFrag1.zhrm.csv	20180321_Q3_U2_1-2_AB_SA_PJH_20180309_ND80SKA123_R2F6.13885.13885.4 File:"20180321_Q3_U2_1-2_AB_SA_PJH_20180309_ND80SKA123_R2F6.raw", NativeID:"controllerType=0 controllerNumber=1 scan=13885"
Ska:Ndc80	61	Inter	SKA2_K_65:SKA1_SORTHIS_T_205	SKA2_64-72:SKA1_SORTHIS_197-206	SKA2	K	65	SKA1_SORTHIS	T	205	FKPVAVEQK	64-72	FIDEETKDTK	197-206	57	0.033761293390394666	2051647550600920	TRUE	PJH_20180309_ND80SKA123_R2F4-11_RISE_MaxMissFrag1.zhrm.csv	20180321_Q3_U2_1-10_AB_SA_PJH_20180309_ND80SKA123_R2F7.14040.14040.3 File:"20180321_Q3_U2_1-10_AB_SA_PJH_20180309_ND80SKA123_R2F7.raw", NativeID:"controllerType=0 controllerNumber=1 scan=14040"
Ska:Ndc80	62	Inter	SKA2_Y_61:SKA3_K_64	SKA2_57-63:SKA3_56-66	SKA2	Y	61	SKA3	K	64	YQTLYAR	57-63	DDINILLDKAR	56-66	99	0.002008032128514056	1.68359e+16	TRUE	PJH_20180309_ND80SKA123_R2F4-11_RISE_MaxMissFrag1.zhrm.csv	20180321_Q3_U2_1-10_AB_SA_PJH_20180309_ND80SKA123_R2F7.26880.26880.3 File:"20180321_Q3_U2_1-10_AB_SA_PJH_20180309_ND80SKA123_R2F7.raw", NativeID:"controllerType=0 controllerNumber=1 scan=26880"
Ska:Ndc80	63	Inter	SKA2_K_65:SKA3_K_64	SKA2_64-72:SKA3_56-66	SKA2	K	65	SKA3	K	64	FKPVAVEQK	64-72	DDINILLDKAR	56-66	153	0.0	2091495566180650	TRUE	PJH_20180309_ND80SKA123_R2F4-11_RISE_MaxMissFrag1.zhrm.csv	20180321_Q3_U2_1-10_AB_SA_PJH_20180309_ND80SKA123_R2F7.26092.26092.3 File:"20180321_Q3_U2_1-10_AB_SA_PJH_20180309_ND80SKA123_R2F7.raw", NativeID:"controllerType=0 controllerNumber=1 scan=26092"
Ska:Ndc80	64	Inter	SKA2_K_75:SKA3_K_64	SKA2_73-77:SKA3_56-66	SKA2	K	75	SKA3	K	64	ESKSR	73-77	DDINILLDKAR	56-66	70	0.015463917525773196	1.14232e+16	TRUE	PJH_20180309_ND80SKA123_R2F4-11_RISE_MaxMissFrag1.zhrm.csv	20180321_Q3_U2_1-2_AB_SA_PJH_20180309_ND80SKA123_R2F6.21328.21328.4 File:"20180321_Q3_U2_1-2_AB_SA_PJH_20180309_ND80SKA123_R2F6.raw", NativeID:"controllerType=0 controllerNumber=1 scan=21328"
Ska:Ndc80	65	Inter	SKA2_S_76:SKA3_K_64	SKA2_73-77:SKA3_56-66	SKA2	S	76	SKA3	K	64	ESKSR	73-77	DDINILLDKAR	56-66	55	0.03744798890429958	1403005651110510	TRUE	PJH_20180309_ND80SKA123_R2F4-11_RISE_MaxMissFrag1.zhrm.csv	20180321_Q3_U2_1-2_AB_SA_PJH_20180309_ND80SKA123_R2F6.21327.21327.3 File:"20180321_Q3_U2_1-2_AB_SA_PJH_20180309_ND80SKA123_R2F6.raw", NativeID:"controllerType=0 controllerNumber=1 scan=21327"
Ska:Ndc80	66	Inter	SKA3_K_247:NDC80_T_350	SKA3_245-257:NDC80_338-351	SKA3	K	247	NDC80	T	350	NNKSEEAIDTESR	245-257	VELEBETIKQENTR	338-351	108	0.0013605442176870747	2.2619e+16	TRUE	PJH_20180309_ND80SKA123_R2F4-11_RISE_MaxMissFrag1.zhrm.csv	20180321_Q3_U2_1-2_AB_SA_PJH_20180309_ND80SKA123_R2F8.12110.12110.4 File:"20180321_Q3_U2_1-2_AB_SA_PJH_20180309_ND80SKA123_R2F8.raw", NativeID:"controllerType=0 controllerNumber=1 scan=12110"
Ska:Ndc80	67	Inter	SKA3_K_410:NDC80_S_4	SKA3_406-413:NDC80_4-13	SKA3	K	410	NDC80	S	4	DVSNKEN	406-413	SSVSSGGAGR	4-13	55	0.03744798890429958	1.49956e+16	TRUE	PJH_20180309_ND80SKA123_R2F4-11_RISE_MaxMissFrag1.zhrm.csv	20180321_Q3_U2_1-10_AB_SA_PJH_20180309_ND80SKA123_R2F7.7472.7472.2 File:"20180321_Q3_U2_1-10_AB_SA_PJH_20180309_ND80SKA123_R2F7.raw", NativeID:"controllerType=0 controllerNumber=1 scan=7472"
Ska:Ndc80	68	Inter	SKA3_K_410:NDC80_T_350	SKA3_406-413:NDC80_338-351	SKA3	K	410	NDC80	T	350	DVSNKEN	406-413	VELEBETIKQENTR	338-351	150	0.0	2765534575225050	TRUE	PJH_20180309_ND80SKA123_R2F4-11_RISE_MaxMissFrag1.zhrm.csv	20180321_Q3_U2_1-10_AB_SA_PJH_20180309_ND80SKA123_R2F7.15320.15320.2 File:"20180321_Q3_U2_1-10_AB_SA_PJH_20180309_ND80SKA123_R2F7.raw", NativeID:"controllerType=0 controllerNumber=1 scan=15320"
Ska:Ndc80	69	Inter	SKA3_K_410:NDC80_S_362	SKA3_406-413:NDC80_352-368	SKA3	K	410	NDC80	S	362	DVSNKEN	406-413	LQNIIDNQKYSVADIER	352-368	113	0.001658374792703151	0.9272298284768908	TRUE	PJH_20180309_ND80SKA123_R2F4-11_RISE_MaxMissFrag1.zhrm.csv	20180321_Q3_U2_1-2_AB_SA_PJH_20180309_ND80SKA123_R2F8.20664.20664.3 File:"20180321_Q3_U2_1-2_AB_SA_PJH_20180309_ND80SKA123_R2F8.raw", NativeID:"controllerType=0 controllerNumber=1 scan=20664"
Ska:Ndc80	70	Inter	SKA3_S_394:NUF2_K_234	SKA3_390-395:NUF2_228-241	SKA3	S	394	NUF2	K	234	AVPPSK	390-395	LSVVSLKEIQESLK	228-241	115	0.001763668430335097	2.90258e+16	TRUE	PJH_20180309_ND80SKA123_R2F4-11_RISE_MaxMissFrag1.zhrm.csv	20180321_Q3_U2_1-10_AB_SA_PJH_20180309_ND80SKA123_R2F9.31858.31858.2 File:"20180321_Q3_U2_1-10_AB_SA_PJH_20180309_ND80SKA123_R2F9.raw", NativeID:"controllerType=0 controllerNumber=1 scan=31858"
Ska:Ndc80	71	Inter	SKA3_K_410:NUF2_T_220	SKA3_406-413:NUF2_214-221	SKA3	K	410	NUF2	T	220	DVSNKEN	406-413	SNISEKTK	214-221	118	0.001996007984031936	1.23825e+16	TRUE	PJH_20180309_ND80SKA123_R2F4-11_RISE_MaxMissFrag1.zhrm.csv	20180321_Q3_U2_1-10_AB_SA_PJH_20180309_ND80SKA123_R2F5.7397.7397.2 File:"20180321_Q3_U2_1-10_AB_SA_PJH_20180309_ND80SKA123_R2F5.raw", NativeID:"controllerType=0 controllerNumber=1 scan=7397"
Ska:Ndc80	72	Inter	SKA3_K_410:NUF2_K_400	SKA3_406-413:NUF2_391-402	SKA3	K	410	NUF2	K	400	DVSNKEN	406-413	VTTINQEIQKIK	391-402	122	0.0	1.61215e+16	TRUE	PJH_20180309_ND80SKA123_R2F4-11_RISE_MaxMissFrag1.zhrm.csv	20180321_Q3_U2_1-10_AB_SA_PJH_20180309_ND80SKA123_R2F7.19097.19097.2 File:"20180321_Q3_U2_1-10_AB_SA_PJH_20180309_ND80SKA123_R2F7.raw", NativeID:"controllerType=0 controllerNumber=1 scan=19097"
Ska:Ndc80	73	Inter	SKA3_S_6:SKA1_SORTHIS_K_21	SKA3_6-10:SKA1_SORTHIS_17-22	SKA3	S	6	SKA1_SORTHIS	K	21	SFBGK	6-10	IGNIKK	17-22	115	0.001763668430335097	0.4864155032647049	TRUE	PJH_20180309_ND80SKA123_R2F4-11_RISE_MaxMissFrag1.zhrm.csv	20180321_Q3_U2_1-10_AB_SA_PJH_20180309_ND80SKA123_R2F7.9889.9889.2 File:"20180321_Q3_U2_1-10_AB_SA_PJH_20180309_ND80SKA123_R2F7.raw", NativeID:"controllerType=0 controllerNumber=1 scan=9889"
Ska:Ndc80	74	Inter	SKA3_S_6:SPC25_6HIS_K_133	SKA3_6-10:SPC25_6HIS_131-139	SKA3	S	6	SPC25_6HIS	K	133	SFBGK	6-10	LQKSADLYK	131-139	71	0.013986013986013986	1.82905e+16	TRUE	PJH_20180309_ND80SKA123_R2F4-11_RISE_MaxMissFrag1.zhrm.csv	20180321_Q3_U2_1-2_AB_SA_PJH_20180309_ND80SKA123_R2F6.15648.15648.3 File:"20180321_Q3_U2_1-2_AB_SA_PJH_20180309_ND80SKA123_R2F6.raw", NativeID:"controllerType=0 controllerNumber=1 scan=15648"
Ska:Ndc80	75	Inter	SKA3_T_79:SPC25_6HIS_K_21	SKA3_78-85:SPC25_6HIS_20-33	SKA3	T	79	SPC25_6HIS	K	21	ATKVLMEK	78-85	FKSTDTSBQMAGLR	20-33	54	0.04041780199818347	0.4892451194066581	TRUE	PJH_20180309_ND80SKA123_R2F4-11_RISE_MaxMissFrag1.zhrm.csv	20180321_Q3_U2_1-10_AB_SA_PJH_20180309_ND80SKA123_R2F7.16562.16562.3 File:"20180321_Q3_U2_1-10_AB_SA_PJH_20180309_ND80SKA123_R2F7.raw", NativeID:"controllerType=0 controllerNumber=1 scan=16562"
Ska:Ndc80	76	Inter	SPC24_K_50:NDC80_S_620	SPC24_41-53:NDC80_610-627	SPC24	K	50	NDC80	S	620	LLETQDGAEKQLR	41-53	EYEEBMSEDLSENIKEIR	610-627	89	0.001564945226917058	0.42685015174304464	TRUE	PJH_20180309_ND80SKA123_R2F4-11_RISE_MaxMissFrag1.zhrm.csv	20180321_Q3_U2_1-2_AB_SA_PJH_20180309_ND80SKA123_R2F10.13876.13876.4 File:"20180321_Q3_U2_1-2_AB_SA_PJH_20180309_ND80SKA123_R2F10.raw", NativeID:"controllerType=0 controllerNumber=1 scan=13876"
Ska:Ndc80	77	Inter	SPC24_K_50:NDC80_K_624	SPC24_41-53:NDC80_610-627	SPC24	K	50	NDC80	K	624	LLETQDGAEKQLR	41-53	EYEEBMSEDLSENIKEIR	610-627	130	0.0	1.6463e+16	TRUE	PJH_20180309_ND80SKA123_R2F4-11_RISE_MaxMissFrag1.zhrm.csv	20180321_Q3_U2_1-2_AB_SA_PJH_20180309_ND80SKA123_R2F8.21825.21825.3 File:"20180321_Q3_U2_1-2_AB_SA_PJH_20180309_ND80SKA123_R2F8.raw", NativeID:"controllerType=0 controllerNumber=1 scan=21825"
Ska:Ndc80	78	Inter	SPC24_K_98:NDC80_T_350	SPC24_97-106:NDC80_338-351	SPC24	K	98	NDC80	T	350	LKASLLQLTR	97-106	VELEBETIKQENTR	338-351	90	0.0015987210231814546	1.05668e+16	TRUE	PJH_20180309_ND80SKA123_R2F4-11_RISE_MaxMissFrag1.zhrm.csv	20180321_Q3_U2_1-2_AB_SA_PJH_20180309_ND80SKA123_R2F8.19509.19509.4 File:"20180321_Q3_U2_1-2_AB_SA_PJH_20180309_ND80SKA123_R2F8.raw", NativeID:"controllerType=0 controllerNumber=1 scan=19509"
Ska:Ndc80	79	Inter	SPC24_K_98:SPC25_6HIS_K_84	SPC24_97-106:SPC25_6HIS_80-90	SPC24	K	98	SPC25_6HIS	K	84	LKASLLQLTR	97-106	DNLLKLIAEVK	80-90	103	0.002267573696145125	1.71088e+16	TRUE	PJH_20180309_ND80SKA123_R2F4-11_RISE_MaxMissFrag1.zhrm.csv	20180321_Q3_U2_1-2_AB_SA_PJH_20180309_ND80SKA123_R2F8.30603.30603.4 File:"20180321_Q3_U2_1-2_AB_SA_PJH_20180309_ND80SKA123_R2F8.raw", NativeID:"controllerType=0 controllerNumber=1 scan=30603"
Ska:Ndc80	80	Inter	SPC25_6HIS_K_21:NDC80_T_591	SPC25_6HIS_20-33:NDC80_585-606	SPC25_6HIS	K	21	NDC80	T	591	FKSTDTSBQMAGLR	20-33	LLEMVATHVGSVEKHLEEQIAK	585-606	98	0.001955034213098729	1.13712e+16	TRUE	PJH_20180309_ND80SKA123_R2F4-11_RISE_MaxMissFrag1.zhrm.csv	20180321_Q3_U2_1-10_AB_SA_PJH_20180309_ND80SKA123_R2F7.26581.26581.4 File:"20180321_Q3_U2_1-10_AB_SA_PJH_20180309_ND80SKA123_R2F7.raw", NativeID:"controllerType=0 controllerNumber=1 scan=26581"
Ska:Ndc80	81	Inter	SPC25_6HIS_K_21:NDC80_S_595	SPC25_6HIS_20-33:NDC80_585-606	SPC25_6HIS	K	21	NDC80	S	595	FKSTDTSBQMAGLR	20-33	LLEmVATHVGSVEKHLEEQIAK	585-606	84	0.0028673835125448033	0.5874765706833929	TRUE	PJH_20180309_ND80SKA123_R2F4-11_RISE_MaxMissFrag1.zhrm.csv	20180321_Q3_U2_1-10_AB_SA_PJH_20180309_ND80SKA123_R2F7.24844.24844.4 File:"20180321_Q3_U2_1-10_AB_SA_PJH_20180309_ND80SKA123_R2F7.raw", NativeID:"controllerType=0 controllerNumber=1 scan=24844"
Ska:Ndc80	82	Inter	SPC25_6HIS_K_21:NDC80_K_598	SPC25_6HIS_20-33:NDC80_585-606	SPC25_6HIS	K	21	NDC80	K	598	FKSTDTSBQMAGLR	20-33	LLEMVATHVGSVEKHLEEQIAK	585-606	107	0.00130718954248366	1.38875e+16	TRUE	PJH_20180309_ND80SKA123_R2F4-11_RISE_MaxMissFrag1.zhrm.csv	20180321_Q3_U2_1-2_AB_SA_PJH_20180309_ND80SKA123_R2F8.22894.22894.4 File:"20180321_Q3_U2_1-2_AB_SA_PJH_20180309_ND80SKA123_R2F8.raw", NativeID:"controllerType=0 controllerNumber=1 scan=22894"
Ska:Ndc80	83	Inter	SPC25_6HIS_K_41:NDC80_Y_630	SPC25_6HIS_38-46:NDC80_625-632	SPC25_6HIS	K	41	NDC80	Y	630	DSIKAFAEK	38-46	EIRDKYEK	625-632	96	0.00186219739292365	0.5070259012761111	TRUE	PJH_20180309_ND80SKA123_R2F4-11_RISE_MaxMissFrag1.zhrm.csv	20180321_Q3_U2_1-2_AB_SA_PJH_20180309_ND80SKA123_R2F6.14405.14405.3 File:"20180321_Q3_U2_1-2_AB_SA_PJH_20180309_ND80SKA123_R2F6.raw", NativeID:"controllerType=0 controllerNumber=1 scan=14405"
Ska:Ndc80	84	Inter	SPC25_6HIS_K_203:NDC80_S_362	SPC25_6HIS_203-215:NDC80_352-368	SPC25_6HIS	K	203	NDC80	S	362	KTNNFSAFLANVR	203-215	LQNIIDNQKYSVADIER	352-368	93	0.0017050298380221654	2.55708e+16	TRUE	PJH_20180309_ND80SKA123_R2F4-11_RISE_MaxMissFrag1.zhrm.csv	20180321_Q3_U2_1-2_AB_SA_PJH_20180309_ND80SKA123_R2F8.25780.25780.4 File:"20180321_Q3_U2_1-2_AB_SA_PJH_20180309_ND80SKA123_R2F8.raw", NativeID:"controllerType=0 controllerNumber=1 scan=25780"
Ska:Ndc80	85	Inter	SPC25_6HIS_K_50:NUF2_K_461	SPC25_6HIS_47-52:NUF2_459-465	SPC25_6HIS	K	50	NUF2	K	461	LSVKLK	47-52	mFKMST	459-465	64	0.023024594453165882	1.9454e+16	TRUE	PJH_20180309_ND80SKA123_R2F4-11_RISE_MaxMissFrag1.zhrm.csv	20180321_Q3_U2_1-10_AB_SA_PJH_20180309_ND80SKA123_R2F7.18420.18420.3 File:"20180321_Q3_U2_1-10_AB_SA_PJH_20180309_ND80SKA123_R2F7.raw", NativeID:"controllerType=0 controllerNumber=1 scan=18420"
Ska:Ndc80	86	Inter	SPC25_6HIS_K_52:SKA3_K_247	SPC25_6HIS_51-56:SKA3_245-257	SPC25_6HIS	K	52	SKA3	K	247	LKEEER	51-56	NNKSEEAIDTESR	245-257	73	0.010228640192539109	4312634018963080	TRUE	PJH_20180309_ND80SKA123_R2F4-11_RISE_MaxMissFrag1.zhrm.csv	20180321_Q3_U2_1-10_AB_SA_PJH_20180309_ND80SKA123_R2F7.7844.7844.3 File:"20180321_Q3_U2_1-10_AB_SA_PJH_20180309_ND80SKA123_R2F7.raw", NativeID:"controllerType=0 controllerNumber=1 scan=7844"
Ska:Ndc80	1	Intra	NDC80_S_66:NDC80_K_59	NDC80_61-67:NDC80_54-60	NDC80	S	66	NDC80	K	59	TSGHGSR	61-67	VSLFGKR	54-60	83	0.00425531914893617	1163039301370560	TRUE	PJH_20180309_ND80SKA123_R2F4-11_RISE_MaxMissFrag1.zhrm.csv	20180321_Q3_U2_1-2_AB_SA_PJH_20180309_ND80SKA123_R2F6.8919.8919.3 File:"20180321_Q3_U2_1-2_AB_SA_PJH_20180309_ND80SKA123_R2F6.raw", NativeID:"controllerType=0 controllerNumber=1 scan=8919"
Ska:Ndc80	2	Intra	NDC80_S_66:NDC80_K_156	NDC80_61-67:NDC80_154-166	NDC80	S	66	NDC80	K	156	TSGHGSR	61-67	IFKDLGYPFALSK	154-166	53	0.041446208112874784	1.4933e+16	TRUE	PJH_20180309_ND80SKA123_R2F4-11_RISE_MaxMissFrag1.zhrm.csv	20180321_Q3_U2_1-2_AB_SA_PJH_20180309_ND80SKA123_R2F6.19933.19933.3 File:"20180321_Q3_U2_1-2_AB_SA_PJH_20180309_ND80SKA123_R2F6.raw", NativeID:"controllerType=0 controllerNumber=1 scan=19933"
Ska:Ndc80	3	Intra	NDC80_K_271:NDC80_K_255	NDC80_265-273:NDC80_254-264	NDC80	K	271	NDC80	K	255	LESLEAKNR	265-273	LKDLFNVDAFK	254-264	138	0.0	1.62415e+16	TRUE	PJH_20180309_ND80SKA123_R2F4-11_RISE_MaxMissFrag1.zhrm.csv	20180321_Q3_U2_1-10_AB_SA_PJH_20180309_ND80SKA123_R2F7.25922.25922.3 File:"20180321_Q3_U2_1-10_AB_SA_PJH_20180309_ND80SKA123_R2F7.raw", NativeID:"controllerType=0 controllerNumber=1 scan=25922"
Ska:Ndc80	4	Intra	NDC80_K_271:NDC80_S_295	NDC80_265-273:NDC80_287-297	NDC80	K	271	NDC80	S	295	LESLEAKNR	265-273	EKEPNRLESLR	287-297	58	0.030873130728412933	2.30222e+16	TRUE	PJH_20180309_ND80SKA123_R2F4-11_RISE_MaxMissFrag1.zhrm.csv	20180321_Q3_U2_1-2_AB_SA_PJH_20180309_ND80SKA123_R2F6.14082.14082.4 File:"20180321_Q3_U2_1-2_AB_SA_PJH_20180309_ND80SKA123_R2F6.raw", NativeID:"controllerType=0 controllerNumber=1 scan=14082"
Ska:Ndc80	5	Intra	NDC80_K_288:NDC80_S_295	NDC80_287-297:NDC80_287-297	NDC80	K	288	NDC80	S	295	EKEPNRLESLR	287-297	EKEPNRLESLR	287-297	93	0.0017050298380221654	3078250782558810	TRUE	PJH_20180309_ND80SKA123_R2F4-11_RISE_MaxMissFrag1.zhrm.csv	20180321_Q3_U2_1-10_AB_SA_PJH_20180309_ND80SKA123_R2F7.12575.12575.6 File:"20180321_Q3_U2_1-10_AB_SA_PJH_20180309_ND80SKA123_R2F7.raw", NativeID:"controllerType=0 controllerNumber=1 scan=12575"
Ska:Ndc80	6	Intra	NDC80_T_350:NDC80_K_360	NDC80_338-351:NDC80_352-368	NDC80	T	350	NDC80	K	360	VELEBETIKQENTR	338-351	LQNIIDNQKYSVADIER	352-368	123	0.0	1.86414e+16	TRUE	PJH_20180309_ND80SKA123_R2F4-11_RISE_MaxMissFrag1.zhrm.csv	20180321_Q3_U2_1-10_AB_SA_PJH_20180309_ND80SKA123_R2F7.23728.23728.3 File:"20180321_Q3_U2_1-10_AB_SA_PJH_20180309_ND80SKA123_R2F7.raw", NativeID:"controllerType=0 controllerNumber=1 scan=23728"
Ska:Ndc80	7	Intra	NDC80_K_360:NDC80_S_362	NDC80_352-368:NDC80_352-368	NDC80	K	360	NDC80	S	362	LQNIIDNQKYSVADIER	352-368	LQNIIDNQKYSVADIER	352-368	92	0.0016666666666666668	3.92189e+16	TRUE	PJH_20180309_ND80SKA123_R2F4-11_RISE_MaxMissFrag1.zhrm.csv	20180321_Q3_U2_1-10_AB_SA_PJH_20180309_ND80SKA123_R2F9.19968.19968.4 File:"20180321_Q3_U2_1-10_AB_SA_PJH_20180309_ND80SKA123_R2F9.raw", NativeID:"controllerType=0 controllerNumber=1 scan=19968"
Ska:Ndc80	8	Intra	NDC80_T_384:NDC80_K_393	NDC80_374-385:NDC80_386-400	NDC80	T	384	NDC80	K	393	NELQQTINKLTK	374-385	DLEAEQQKLWNEELK	386-400	79	0.006012024048096192	1897671170549240	TRUE	PJH_20180309_ND80SKA123_R2F4-11_RISE_MaxMissFrag1.zhrm.csv	20180321_Q3_U2_1-2_AB_SA_PJH_20180309_ND80SKA123_R2F8.27983.27983.4 File:"20180321_Q3_U2_1-2_AB_SA_PJH_20180309_ND80SKA123_R2F8.raw", NativeID:"controllerType=0 controllerNumber=1 scan=27983"
Ska:Ndc80	9	Intra	NDC80_K_385:NDC80_T_350	NDC80_383-393:NDC80_338-351	NDC80	K	385	NDC80	T	350	LTKDLEAEQQK	383-393	VELEBETIKQENTR	338-351	97	0.001899335232668566	2.35417e+16	TRUE	PJH_20180309_ND80SKA123_R2F4-11_RISE_MaxMissFrag1.zhrm.csv	20180321_Q3_U2_1-2_AB_SA_PJH_20180309_ND80SKA123_R2F8.13162.13162.4 File:"20180321_Q3_U2_1-2_AB_SA_PJH_20180309_ND80SKA123_R2F8.raw", NativeID:"controllerType=0 controllerNumber=1 scan=13162"
Ska:Ndc80	10	Intra	NDC80_K_385:NDC80_K_385	NDC80_383-393:NDC80_383-393	NDC80	K	385	NDC80	K	385	LTKDLEAEQQK	383-393	LTKDLEAEQQK	383-393	102	0.0022002200220022	0.3879686069230396	TRUE	PJH_20180309_ND80SKA123_R2F4-11_RISE_MaxMissFrag1.zhrm.csv	20180321_Q3_U2_1-10_AB_SA_PJH_20180309_ND80SKA123_R2F9.29012.29012.2 File:"20180321_Q3_U2_1-10_AB_SA_PJH_20180309_ND80SKA123_R2F9.raw", NativeID:"controllerType=0 controllerNumber=1 scan=29012"
Ska:Ndc80	11	Intra	NDC80_K_427:NDC80_Y_453	NDC80_424-433:NDC80_441-454	NDC80	K	427	NDC80	Y	453	LIPKGAENSK	424-433	FNPEAGANBLVKYR	441-454	60	0.027902341803687097	0.14541487144410484	TRUE	PJH_20180309_ND80SKA123_R2F4-11_RISE_MaxMissFrag1.zhrm.csv	20180321_Q3_U2_1-10_AB_SA_PJH_20180309_ND80SKA123_R2F7.18248.18248.2 File:"20180321_Q3_U2_1-10_AB_SA_PJH_20180309_ND80SKA123_R2F7.raw", NativeID:"controllerType=0 controllerNumber=1 scan=18248"
Ska:Ndc80	12	Intra	NDC80_T_502:NDC80_K_497	NDC80_502-509:NDC80_480-498	NDC80	T	502	NDC80	K	497	TLKEEVQK	502-509	MGLEDTLEQLNAMITESKR	480-498	126	0.0	2570586007729680	TRUE	PJH_20180309_ND80SKA123_R2F4-11_RISE_MaxMissFrag1.zhrm.csv	20180321_Q3_U2_1-10_AB_SA_PJH_20180309_ND80SKA123_R2F7.34764.34764.3 File:"20180321_Q3_U2_1-10_AB_SA_PJH_20180309_ND80SKA123_R2F7.raw", NativeID:"controllerType=0 controllerNumber=1 scan=34764"
Ska:Ndc80	13	Intra	NDC80_K_504:NDC80_S_496	NDC80_502-509:NDC80_480-498	NDC80	K	504	NDC80	S	496	TLKEEVQK	502-509	MGLEDTLEQLNAMITESKR	480-498	88	0.001529051987767584	4320442725332100	TRUE	PJH_20180309_ND80SKA123_R2F4-11_RISE_MaxMissFrag1.zhrm.csv	20180321_Q3_U2_1-2_AB_SA_PJH_20180309_ND80SKA123_R2F8.32059.32059.4 File:"20180321_Q3_U2_1-2_AB_SA_PJH_20180309_ND80SKA123_R2F8.raw", NativeID:"controllerType=0 controllerNumber=1 scan=32059"
Ska:Ndc80	14	Intra	NDC80_K_504:NDC80_K_497	NDC80_502-509:NDC80_480-498	NDC80	K	504	NDC80	K	497	TLKEEVQK	502-509	MGLEDTLEQLNAMITESKR	480-498	142	0.0	4017480150598280	TRUE	PJH_20180309_ND80SKA123_R2F4-11_RISE_MaxMissFrag1.zhrm.csv	20180321_Q3_U2_1-2_AB_SA_PJH_20180309_ND80SKA123_R2F8.31559.31559.4 File:"20180321_Q3_U2_1-2_AB_SA_PJH_20180309_ND80SKA123_R2F8.raw", NativeID:"controllerType=0 controllerNumber=1 scan=31559"
Ska:Ndc80	15	Intra	NDC80_K_577:NDC80_T_350	NDC80_577-584:NDC80_338-351	NDC80	K	577	NDC80	T	350	KVGNNLQR	577-584	VELEBETIKQENTR	338-351	99	0.002008032128514056	0.5978743249134622	TRUE	PJH_20180309_ND80SKA123_R2F4-11_RISE_MaxMissFrag1.zhrm.csv	20180321_Q3_U2_1-10_AB_SA_PJH_20180309_ND80SKA123_R2F7.12692.12692.4 File:"20180321_Q3_U2_1-10_AB_SA_PJH_20180309_ND80SKA123_R2F7.raw", NativeID:"controllerType=0 controllerNumber=1 scan=12692"
Ska:Ndc80	16	Intra	NDC80_K_577:NDC80_K_360	NDC80_577-584:NDC80_352-368	NDC80	K	577	NDC80	K	360	KVGNNLQR	577-584	LQNIIDNQKYSVADIER	352-368	68	0.016138007790762382	3.86743e+16	TRUE	PJH_20180309_ND80SKA123_R2F4-11_RISE_MaxMissFrag1.zhrm.csv	20180321_Q3_U2_1-10_AB_SA_PJH_20180309_ND80SKA123_R2F7.19960.19960.4 File:"20180321_Q3_U2_1-10_AB_SA_PJH_20180309_ND80SKA123_R2F7.raw", NativeID:"controllerType=0 controllerNumber=1 scan=19960"
Ska:Ndc80	17	Intra	NDC80_K_629:NDC80_S_640	NDC80_628-632:NDC80_634-643	NDC80	K	629	NDC80	S	640	DKYEK	628-632	ATLIKSSEE	634-643	66	0.019956850053937436	1659329314690420	TRUE	PJH_20180309_ND80SKA123_R2F4-11_RISE_MaxMissFrag1.zhrm.csv	20180321_Q3_U2_1-10_AB_SA_PJH_20180309_ND80SKA123_R2F7.11903.11903.3 File:"20180321_Q3_U2_1-10_AB_SA_PJH_20180309_ND80SKA123_R2F7.raw", NativeID:"controllerType=0 controllerNumber=1 scan=11903"
Ska:Ndc80	18	Intra	NDC80_K_633:NDC80_K_629	NDC80_633-638:NDC80_628-632	NDC80	K	633	NDC80	K	629	KATLIK	633-638	DKYEK	628-632	162	0.0	0.43946676261528456	TRUE	PJH_20180309_ND80SKA123_R2F4-11_RISE_MaxMissFrag1.zhrm.csv	20180321_Q3_U2_1-2_AB_SA_PJH_20180309_ND80SKA123_R2F6.9488.9488.3 File:"20180321_Q3_U2_1-2_AB_SA_PJH_20180309_ND80SKA123_R2F6.raw", NativeID:"controllerType=0 controllerNumber=1 scan=9488"
Ska:Ndc80	19	Intra	NDC80_K_633:NDC80_Y_630	NDC80_633-638:NDC80_625-632	NDC80	K	633	NDC80	Y	630	KATLIK	633-638	EIRDKYEK	625-632	106	0.0024509803921568627	1.48371e+16	TRUE	PJH_20180309_ND80SKA123_R2F4-11_RISE_MaxMissFrag1.zhrm.csv	20180321_Q3_U2_1-10_AB_SA_PJH_20180309_ND80SKA123_R2F7.9117.9117.3 File:"20180321_Q3_U2_1-10_AB_SA_PJH_20180309_ND80SKA123_R2F7.raw", NativeID:"controllerType=0 controllerNumber=1 scan=9117"
Ska:Ndc80	20	Intra	NDC80_T_635:NDC80_K_629	NDC80_633-638:NDC80_625-632	NDC80	T	635	NDC80	K	629	KATLIK	633-638	EIRDKYEK	625-632	126	0.0	1.18761e+16	TRUE	PJH_20180309_ND80SKA123_R2F4-11_RISE_MaxMissFrag1.zhrm.csv	20180321_Q3_U2_1-2_AB_SA_PJH_20180309_ND80SKA123_R2F6.10569.10569.2 File:"20180321_Q3_U2_1-2_AB_SA_PJH_20180309_ND80SKA123_R2F6.raw", NativeID:"controllerType=0 controllerNumber=1 scan=10569"
Ska:Ndc80	21	Intra	NUF2_T_220:NUF2_K_212	NUF2_214-221:NUF2_202-213	NUF2	T	220	NUF2	K	212	SNISEKTK	214-221	TIVLQEGNSQKK	202-213	106	0.0024509803921568627	1.5368e+16	TRUE	PJH_20180309_ND80SKA123_R2F4-11_RISE_MaxMissFrag1.zhrm.csv	20180321_Q3_U2_1-10_AB_SA_PJH_20180309_ND80SKA123_R2F7.9107.9107.3 File:"20180321_Q3_U2_1-10_AB_SA_PJH_20180309_ND80SKA123_R2F7.raw", NativeID:"controllerType=0 controllerNumber=1 scan=9107"
Ska:Ndc80	22	Intra	NUF2_K_266:NUF2_K_259	NUF2_265-269:NUF2_258-264	NUF2	K	266	NUF2	K	259	LKNAR	265-269	MKDTVQK	258-264	120	0.0	0.16549551078961447	TRUE	PJH_20180309_ND80SKA123_R2F4-11_RISE_MaxMissFrag1.zhrm.csv	20180321_Q3_U2_1-2_AB_SA_PJH_20180309_ND80SKA123_R2F6.5351.5351.2 File:"20180321_Q3_U2_1-2_AB_SA_PJH_20180309_ND80SKA123_R2F6.raw", NativeID:"controllerType=0 controllerNumber=1 scan=5351"
Ska:Ndc80	23	Intra	NUF2_K_348:NUF2_K_351	NUF2_344-349:NUF2_350-358	NUF2	K	348	NUF2	K	351	LMIVKK	344-349	EKLATAQFK	350-358	111	0.0015432098765432098	1.29401e+16	TRUE	PJH_20180309_ND80SKA123_R2F4-11_RISE_MaxMissFrag1.zhrm.csv	20180321_Q3_U2_1-10_AB_SA_PJH_20180309_ND80SKA123_R2F7.16045.16045.4 File:"20180321_Q3_U2_1-10_AB_SA_PJH_20180309_ND80SKA123_R2F7.raw", NativeID:"controllerType=0 controllerNumber=1 scan=16045"
Ska:Ndc80	24	Intra	NUF2_K_362:NUF2_K_358	NUF2_362-367:NUF2_352-361	NUF2	K	362	NUF2	K	358	KHEDVK	362-367	LATAQFKINK	352-361	131	0.0	1.90367e+16	TRUE	PJH_20180309_ND80SKA123_R2F4-11_RISE_MaxMissFrag1.zhrm.csv	20180321_Q3_U2_1-2_AB_SA_PJH_20180309_ND80SKA123_R2F6.10405.10405.3 File:"20180321_Q3_U2_1-2_AB_SA_PJH_20180309_ND80SKA123_R2F6.raw", NativeID:"controllerType=0 controllerNumber=1 scan=10405"
Ska:Ndc80	25	Intra	NUF2_K_383:NUF2_Y_388	NUF2_380-384:NUF2_385-390	NUF2	K	383	NUF2	Y	388	VQEKR	380-384	GAVYER	385-390	102	0.0022002200220022	0.5650259737414536	TRUE	PJH_20180309_ND80SKA123_R2F4-11_RISE_MaxMissFrag1.zhrm.csv	20180321_Q3_U2_1-2_AB_SA_PJH_20180309_ND80SKA123_R2F6.7007.7007.4 File:"20180321_Q3_U2_1-2_AB_SA_PJH_20180309_ND80SKA123_R2F6.raw", NativeID:"controllerType=0 controllerNumber=1 scan=7007"
Ska:Ndc80	26	Intra	NUF2_K_383:NUF2_K_400	NUF2_380-384:NUF2_391-402	NUF2	K	383	NUF2	K	400	VQEKR	380-384	VTTINQEIQKIK	391-402	80	0.006060606060606061	1.43846e+16	TRUE	PJH_20180309_ND80SKA123_R2F4-11_RISE_MaxMissFrag1.zhrm.csv	20180321_Q3_U2_1-2_AB_SA_PJH_20180309_ND80SKA123_R2F6.14805.14805.3 File:"20180321_Q3_U2_1-2_AB_SA_PJH_20180309_ND80SKA123_R2F6.raw", NativeID:"controllerType=0 controllerNumber=1 scan=14805"
Ska:Ndc80	27	Intra	NUF2_Y_388:NUF2_K_400	NUF2_385-390:NUF2_391-402	NUF2	Y	388	NUF2	K	400	GAVYER	385-390	VTTINQEIQKIK	391-402	103	0.002267573696145125	0.9477801656567246	TRUE	PJH_20180309_ND80SKA123_R2F4-11_RISE_MaxMissFrag1.zhrm.csv	20180321_Q3_U2_1-10_AB_SA_PJH_20180309_ND80SKA123_R2F7.19941.19941.3 File:"20180321_Q3_U2_1-10_AB_SA_PJH_20180309_ND80SKA123_R2F7.raw", NativeID:"controllerType=0 controllerNumber=1 scan=19941"
Ska:Ndc80	28	Intra	NUF2_K_400:NUF2_K_400	NUF2_391-402:NUF2_391-402	NUF2	K	400	NUF2	K	400	VTTINQEIQKIK	391-402	VTTINQEIQKIK	391-402	107	0.00130718954248366	2.17255e+16	TRUE	PJH_20180309_ND80SKA123_R2F4-11_RISE_MaxMissFrag1.zhrm.csv	20180321_Q3_U2_1-10_AB_SA_PJH_20180309_ND80SKA123_R2F7.22583.22583.4 File:"20180321_Q3_U2_1-10_AB_SA_PJH_20180309_ND80SKA123_R2F7.raw", NativeID:"controllerType=0 controllerNumber=1 scan=22583"
Ska:Ndc80	29	Intra	NUF2_K_418:NUF2_K_432	NUF2_417-427:NUF2_428-439	NUF2	K	418	NUF2	K	432	LKSQEIFLNLK	417-427	TALEKYHDGIEK	428-439	101	0.002123142250530785	3.06623e+16	TRUE	PJH_20180309_ND80SKA123_R2F4-11_RISE_MaxMissFrag1.zhrm.csv	20180321_Q3_U2_1-2_AB_SA_PJH_20180309_ND80SKA123_R2F6.21529.21529.3 File:"20180321_Q3_U2_1-2_AB_SA_PJH_20180309_ND80SKA123_R2F6.raw", NativeID:"controllerType=0 controllerNumber=1 scan=21529"
Ska:Ndc80	30	Intra	NUF2_K_456:NUF2_Y_445	NUF2_452-457:NUF2_440-447	NUF2	K	456	NUF2	Y	445	TAELKR	452-457	AAEDSYAK	440-447	126	0.0	0.5440058145451016	TRUE	PJH_20180309_ND80SKA123_R2F4-11_RISE_MaxMissFrag1.zhrm.csv	20180321_Q3_U2_1-2_AB_SA_PJH_20180309_ND80SKA123_R2F6.8703.8703.2 File:"20180321_Q3_U2_1-2_AB_SA_PJH_20180309_ND80SKA123_R2F6.raw", NativeID:"controllerType=0 controllerNumber=1 scan=8703"
Ska:Ndc80	31	Intra	NUF2_K_456:NUF2_K_447	NUF2_452-457:NUF2_440-451	NUF2	K	456	NUF2	K	447	TAELKR	452-457	AAEDSYAKIDEK	440-451	53	0.041446208112874784	2672548167099620	TRUE	PJH_20180309_ND80SKA123_R2F4-11_RISE_MaxMissFrag1.zhrm.csv	20180321_Q3_U2_1-2_AB_SA_PJH_20180309_ND80SKA123_R2F6.11985.11985.3 File:"20180321_Q3_U2_1-2_AB_SA_PJH_20180309_ND80SKA123_R2F6.raw", NativeID:"controllerType=0 controllerNumber=1 scan=11985"
Ska:Ndc80	32	Intra	NUF2_K_456:NUF2_K_461	NUF2_452-457:NUF2_459-465	NUF2	K	456	NUF2	K	461	TAELKR	452-457	MFKmST	459-465	159	0.0	0.350469802060582	TRUE	PJH_20180309_ND80SKA123_R2F4-11_RISE_MaxMissFrag1.zhrm.csv	20180321_Q3_U2_1-10_AB_SA_PJH_20180309_ND80SKA123_R2F7.11889.11889.2 File:"20180321_Q3_U2_1-10_AB_SA_PJH_20180309_ND80SKA123_R2F7.raw", NativeID:"controllerType=0 controllerNumber=1 scan=11889"
Ska:Ndc80	33	Intra	NUF2_K_456:NUF2_T_464	NUF2_452-457:NUF2_459-465	NUF2	K	456	NUF2	T	464	TAELKR	452-457	MFKmST	459-465	59	0.029945999018163968	0.3070526397748193	TRUE	PJH_20180309_ND80SKA123_R2F4-11_RISE_MaxMissFrag1.zhrm.csv	20180321_Q3_U2_1-10_AB_SA_PJH_20180309_ND80SKA123_R2F5.13628.13628.3 File:"20180321_Q3_U2_1-10_AB_SA_PJH_20180309_ND80SKA123_R2F5.raw", NativeID:"controllerType=0 controllerNumber=1 scan=13628"
Ska:Ndc80	34	Intra	SKA1_SORTHIS_K_21:SKA1_SORTHIS_T_34	SKA1_SORTHIS_17-22:SKA1_SORTHIS_28-36	SKA1_SORTHIS	K	21	SKA1_SORTHIS	T	34	IGNIKK	17-22	NBGQEPTLK	28-36	62	0.0257201646090535	1.56315e+16	TRUE	PJH_20180309_ND80SKA123_R2F4-11_RISE_MaxMissFrag1.zhrm.csv	20180321_Q3_U2_1-10_AB_SA_PJH_20180309_ND80SKA123_R2F7.10263.10263.3 File:"20180321_Q3_U2_1-10_AB_SA_PJH_20180309_ND80SKA123_R2F7.raw", NativeID:"controllerType=0 controllerNumber=1 scan=10263"
Ska:Ndc80	35	Intra	SKA2_K_48:SKA2_K_31	SKA2_42-54:SKA2_26-41	SKA2	K	48	SKA2	K	31	NPVTLLKELSVIK	42-54	LEYEIKTNHPDSASEK	26-41	101	0.002123142250530785	1.22042e+16	TRUE	PJH_20180309_ND80SKA123_R2F4-11_RISE_MaxMissFrag1.zhrm.csv	20180321_Q3_U2_1-10_AB_SA_PJH_20180309_ND80SKA123_R2F7.28102.28102.3 File:"20180321_Q3_U2_1-10_AB_SA_PJH_20180309_ND80SKA123_R2F7.raw", NativeID:"controllerType=0 controllerNumber=1 scan=28102"
Ska:Ndc80	36	Intra	SKA2_K_48:SKA2_S_37	SKA2_42-54:SKA2_26-41	SKA2	K	48	SKA2	S	37	NPVTLLKELSVIK	42-54	LEYEIKTNHPDSASEK	26-41	66	0.019956850053937436	3.48903e+16	TRUE	PJH_20180309_ND80SKA123_R2F4-11_RISE_MaxMissFrag1.zhrm.csv	20180321_Q3_U2_1-10_AB_SA_PJH_20180309_ND80SKA123_R2F9.20030.20030.5 File:"20180321_Q3_U2_1-10_AB_SA_PJH_20180309_ND80SKA123_R2F9.raw", NativeID:"controllerType=0 controllerNumber=1 scan=20030"
Ska:Ndc80	37	Intra	SKA2_K_48:SKA2_S_39	SKA2_42-54:SKA2_26-41	SKA2	K	48	SKA2	S	39	NPVTLLKELSVIK	42-54	LEYEIKTNHPDSASEK	26-41	128	0.0	2.62045e+16	TRUE	PJH_20180309_ND80SKA123_R2F4-11_RISE_MaxMissFrag1.zhrm.csv	20180321_Q3_U2_1-2_AB_SA_PJH_20180309_ND80SKA123_R2F8.24521.24521.5 File:"20180321_Q3_U2_1-2_AB_SA_PJH_20180309_ND80SKA123_R2F8.raw", NativeID:"controllerType=0 controllerNumber=1 scan=24521"
Ska:Ndc80	38	Intra	SKA2_S_51:SKA2_K_31	SKA2_42-54:SKA2_26-41	SKA2	S	51	SKA2	K	31	NPVTLLKELSVIK	42-54	LEYEIKTNHPDSASEK	26-41	94	0.0017452006980802793	2.67546e+16	TRUE	PJH_20180309_ND80SKA123_R2F4-11_RISE_MaxMissFrag1.zhrm.csv	20180321_Q3_U2_1-2_AB_SA_PJH_20180309_ND80SKA123_R2F8.24708.24708.5 File:"20180321_Q3_U2_1-2_AB_SA_PJH_20180309_ND80SKA123_R2F8.raw", NativeID:"controllerType=0 controllerNumber=1 scan=24708"
Ska:Ndc80	39	Intra	SKA2_K_54:SKA2_K_65	SKA2_49-56:SKA2_64-72	SKA2	K	54	SKA2	K	65	ELSVIKSR	49-56	FKPVAVEQK	64-72	63	0.02392095683827353	2.1158e+16	TRUE	PJH_20180309_ND80SKA123_R2F4-11_RISE_MaxMissFrag1.zhrm.csv	20180321_Q3_U2_1-10_AB_SA_PJH_20180309_ND80SKA123_R2F7.15886.15886.4 File:"20180321_Q3_U2_1-10_AB_SA_PJH_20180309_ND80SKA123_R2F7.raw", NativeID:"controllerType=0 controllerNumber=1 scan=15886"
Ska:Ndc80	40	Intra	SKA2_S_55:SKA2_K_65	SKA2_49-56:SKA2_64-72	SKA2	S	55	SKA2	K	65	ELSVIKSR	49-56	FKPVAVEQK	64-72	106	0.0024509803921568627	0.2042270556177624	TRUE	PJH_20180309_ND80SKA123_R2F4-11_RISE_MaxMissFrag1.zhrm.csv	20180321_Q3_U2_1-2_AB_SA_PJH_20180309_ND80SKA123_R2F6.16868.16868.3 File:"20180321_Q3_U2_1-2_AB_SA_PJH_20180309_ND80SKA123_R2F6.raw", NativeID:"controllerType=0 controllerNumber=1 scan=16868"
Ska:Ndc80	41	Intra	SKA2_Y_61:SKA2_K_65	SKA2_57-63:SKA2_64-72	SKA2	Y	61	SKA2	K	65	YQTLYAR	57-63	FKPVAVEQK	64-72	83	0.00425531914893617	1.11464e+16	TRUE	PJH_20180309_ND80SKA123_R2F4-11_RISE_MaxMissFrag1.zhrm.csv	20180321_Q3_U2_1-10_AB_SA_PJH_20180309_ND80SKA123_R2F7.15572.15572.3 File:"20180321_Q3_U2_1-10_AB_SA_PJH_20180309_ND80SKA123_R2F7.raw", NativeID:"controllerType=0 controllerNumber=1 scan=15572"
Ska:Ndc80	42	Intra	SKA3_K_10:SKA3_K_10	SKA3_6-12:SKA3_6-12	SKA3	K	10	SKA3	K	10	SFBGKLR	6-12	SFBGKLR	6-12	157	0.0	1.47467e+16	TRUE	PJH_20180309_ND80SKA123_R2F4-11_RISE_MaxMissFrag1.zhrm.csv	20180321_Q3_U2_1-2_AB_SA_PJH_20180309_ND80SKA123_R2F6.15854.15854.3 File:"20180321_Q3_U2_1-2_AB_SA_PJH_20180309_ND80SKA123_R2F6.raw", NativeID:"controllerType=0 controllerNumber=1 scan=15854"
Ska:Ndc80	43	Intra	SKA3_K_10:SKA3_S_13	SKA3_6-12:SKA3_13-24	SKA3	K	10	SKA3	S	13	SFBGKLR	6-12	SLASTLDBETAR	13-24	117	0.0019157088122605363	2143809599610660	TRUE	PJH_20180309_ND80SKA123_R2F4-11_RISE_MaxMissFrag1.zhrm.csv	20180321_Q3_U2_1-2_AB_SA_PJH_20180309_ND80SKA123_R2F8.18340.18340.3 File:"20180321_Q3_U2_1-2_AB_SA_PJH_20180309_ND80SKA123_R2F8.raw", NativeID:"controllerType=0 controllerNumber=1 scan=18340"
Ska:Ndc80	44	Intra	SKA3_K_92:SKA3_K_99	SKA3_86-94:SKA3_95-105	SKA3	K	92	SKA3	K	99	NSMDIMKIR	86-94	EYFQKYGYSPR	95-105	134	0.0	2.48185e+16	TRUE	PJH_20180309_ND80SKA123_R2F4-11_RISE_MaxMissFrag1.zhrm.csv	20180321_Q3_U2_1-2_AB_SA_PJH_20180309_ND80SKA123_R2F6.23131.23131.3 File:"20180321_Q3_U2_1-2_AB_SA_PJH_20180309_ND80SKA123_R2F6.raw", NativeID:"controllerType=0 controllerNumber=1 scan=23131"
Ska:Ndc80	45	Intra	SKA3_K_92:SKA3_Y_100	SKA3_86-94:SKA3_95-105	SKA3	K	92	SKA3	Y	100	NSMDIMKIR	86-94	EYFQKYGYSPR	95-105	113	0.001658374792703151	1301071605545080	TRUE	PJH_20180309_ND80SKA123_R2F4-11_RISE_MaxMissFrag1.zhrm.csv	20180321_Q3_U2_1-10_AB_SA_PJH_20180309_ND80SKA123_R2F7.23024.23024.3 File:"20180321_Q3_U2_1-10_AB_SA_PJH_20180309_ND80SKA123_R2F7.raw", NativeID:"controllerType=0 controllerNumber=1 scan=23024"
Ska:Ndc80	46	Intra	SKA3_K_92:SKA3_Y_102	SKA3_86-94:SKA3_95-105	SKA3	K	92	SKA3	Y	102	NSMDIMKIR	86-94	EYFQKYGYSPR	95-105	117	0.0019157088122605363	1.43064e+16	TRUE	PJH_20180309_ND80SKA123_R2F4-11_RISE_MaxMissFrag1.zhrm.csv	20180321_Q3_U2_1-10_AB_SA_PJH_20180309_ND80SKA123_R2F7.23036.23036.4 File:"20180321_Q3_U2_1-10_AB_SA_PJH_20180309_ND80SKA123_R2F7.raw", NativeID:"controllerType=0 controllerNumber=1 scan=23036"
Ska:Ndc80	47	Intra	SKA3_K_92:SKA3_S_103	SKA3_86-94:SKA3_95-105	SKA3	K	92	SKA3	S	103	NSMDImKIR	86-94	EYFQKYGYSPR	95-105	135	0.0	0.573322679257645	TRUE	PJH_20180309_ND80SKA123_R2F4-11_RISE_MaxMissFrag1.zhrm.csv	20180321_Q3_U2_1-2_AB_SA_PJH_20180309_ND80SKA123_R2F6.20476.20476.3 File:"20180321_Q3_U2_1-2_AB_SA_PJH_20180309_ND80SKA123_R2F6.raw", NativeID:"controllerType=0 controllerNumber=1 scan=20476"
Ska:Ndc80	48	Intra	SKA3_K_399:SKA3_K_247	SKA3_397-405:SKA3_245-257	SKA3	K	399	SKA3	K	247	FLKHGQNIR	397-405	NNKSEEAIDTESR	245-257	72	0.013641755634638195	2.28197e+16	TRUE	PJH_20180309_ND80SKA123_R2F4-11_RISE_MaxMissFrag1.zhrm.csv	20180321_Q3_U2_1-2_AB_SA_PJH_20180309_ND80SKA123_R2F6.10659.10659.3 File:"20180321_Q3_U2_1-2_AB_SA_PJH_20180309_ND80SKA123_R2F6.raw", NativeID:"controllerType=0 controllerNumber=1 scan=10659"
Ska:Ndc80	49	Intra	SKA3_K_399:SKA3_K_399	SKA3_397-405:SKA3_397-405	SKA3	K	399	SKA3	K	399	FLKHGQNIR	397-405	FLKHGQNIR	397-405	57	0.033761293390394666	1.84415e+16	TRUE	PJH_20180309_ND80SKA123_R2F4-11_RISE_MaxMissFrag1.zhrm.csv	20180321_Q3_U2_1-2_AB_SA_PJH_20180309_ND80SKA123_R2F6.10742.10742.3 File:"20180321_Q3_U2_1-2_AB_SA_PJH_20180309_ND80SKA123_R2F6.raw", NativeID:"controllerType=0 controllerNumber=1 scan=10742"
Ska:Ndc80	50	Intra	SKA3_K_410:SKA3_K_10	SKA3_406-413:SKA3_6-12	SKA3	K	410	SKA3	K	10	DVSNKEN	406-413	SFBGKLR	6-12	111	0.0015432098765432098	3.1289e+16	TRUE	PJH_20180309_ND80SKA123_R2F4-11_RISE_MaxMissFrag1.zhrm.csv	20180321_Q3_U2_1-2_AB_SA_PJH_20180309_ND80SKA123_R2F6.13856.13856.2 File:"20180321_Q3_U2_1-2_AB_SA_PJH_20180309_ND80SKA123_R2F6.raw", NativeID:"controllerType=0 controllerNumber=1 scan=13856"
Ska:Ndc80	51	Intra	SKA3_K_410:SKA3_T_254	SKA3_406-413:SKA3_245-257	SKA3	K	410	SKA3	T	254	DVSNKEN	406-413	NNKSEEAIDTESR	245-257	142	0.0	1.91264e+16	TRUE	PJH_20180309_ND80SKA123_R2F4-11_RISE_MaxMissFrag1.zhrm.csv	20180321_Q3_U2_1-2_AB_SA_PJH_20180309_ND80SKA123_R2F6.11145.11145.3 File:"20180321_Q3_U2_1-2_AB_SA_PJH_20180309_ND80SKA123_R2F6.raw", NativeID:"controllerType=0 controllerNumber=1 scan=11145"
Ska:Ndc80	52	Intra	SKA3_K_410:SKA3_S_256	SKA3_406-413:SKA3_245-257	SKA3	K	410	SKA3	S	256	DVSNKEN	406-413	NNKSEEAIDTESR	245-257	155	0.0	2.23951e+16	TRUE	PJH_20180309_ND80SKA123_R2F4-11_RISE_MaxMissFrag1.zhrm.csv	20180321_Q3_U2_1-10_AB_SA_PJH_20180309_ND80SKA123_R2F7.10010.10010.3 File:"20180321_Q3_U2_1-10_AB_SA_PJH_20180309_ND80SKA123_R2F7.raw", NativeID:"controllerType=0 controllerNumber=1 scan=10010"
Ska:Ndc80	53	Intra	SKA3_K_410:SKA3_K_399	SKA3_406-413:SKA3_397-405	SKA3	K	410	SKA3	K	399	DVSNKEN	406-413	FLKHGQNIR	397-405	110	0.0014749262536873154	1.57779e+16	TRUE	PJH_20180309_ND80SKA123_R2F4-11_RISE_MaxMissFrag1.zhrm.csv	20180321_Q3_U2_1-10_AB_SA_PJH_20180309_ND80SKA123_R2F7.8740.8740.2 File:"20180321_Q3_U2_1-10_AB_SA_PJH_20180309_ND80SKA123_R2F7.raw", NativeID:"controllerType=0 controllerNumber=1 scan=8740"
Ska:Ndc80	54	Intra	SKA3_K_410:SKA3_K_410	SKA3_406-413:SKA3_406-413	SKA3	K	410	SKA3	K	410	DVSNKEN	406-413	DVSNKEN	406-413	145	0.0	1.33057e+16	TRUE	PJH_20180309_ND80SKA123_R2F4-11_RISE_MaxMissFrag1.zhrm.csv	20180321_Q3_U2_1-10_AB_SA_PJH_20180309_ND80SKA123_R2F7.8263.8263.2 File:"20180321_Q3_U2_1-10_AB_SA_PJH_20180309_ND80SKA123_R2F7.raw", NativeID:"controllerType=0 controllerNumber=1 scan=8263"
Ska:Ndc80	55	Intra	SPC24_K_98:SPC24_K_50	SPC24_97-106:SPC24_41-53	SPC24	K	98	SPC24	K	50	LKASLLQLTR	97-106	LLETQDGAEKQLR	41-53	55	0.03744798890429958	2.64388e+16	TRUE	PJH_20180309_ND80SKA123_R2F4-11_RISE_MaxMissFrag1.zhrm.csv	20180321_Q3_U2_1-2_AB_SA_PJH_20180309_ND80SKA123_R2F8.19485.19485.3 File:"20180321_Q3_U2_1-2_AB_SA_PJH_20180309_ND80SKA123_R2F8.raw", NativeID:"controllerType=0 controllerNumber=1 scan=19485"
Ska:Ndc80	56	Intra	SPC24_K_98:SPC24_K_112	SPC24_97-106:SPC24_107-120	SPC24	K	98	SPC24	K	112	LKASLLQLTR	97-106	ELEELKEIEADLER	107-120	149	0.0	4161823367873320	TRUE	PJH_20180309_ND80SKA123_R2F4-11_RISE_MaxMissFrag1.zhrm.csv	20180321_Q3_U2_1-2_AB_SA_PJH_20180309_ND80SKA123_R2F8.30332.30332.3 File:"20180321_Q3_U2_1-2_AB_SA_PJH_20180309_ND80SKA123_R2F8.raw", NativeID:"controllerType=0 controllerNumber=1 scan=30332"
Ska:Ndc80	57	Intra	SPC24_K_112:SPC24_S_147	SPC24_107-120:SPC24_121-148	SPC24	K	112	SPC24	S	147	ELEELKEIEADLER	107-120	QEKEVDEDTTVTIPSAVYVAQLYHQVSK	121-148	53	0.041446208112874784	5059900876819210	TRUE	PJH_20180309_ND80SKA123_R2F4-11_RISE_MaxMissFrag1.zhrm.csv	20180321_Q3_U2_1-2_AB_SA_PJH_20180309_ND80SKA123_R2F10.23175.23175.5 File:"20180321_Q3_U2_1-2_AB_SA_PJH_20180309_ND80SKA123_R2F10.raw", NativeID:"controllerType=0 controllerNumber=1 scan=23175"
Ska:Ndc80	58	Intra	SPC25_6HIS_K_52:SPC25_6HIS_S_39	SPC25_6HIS_51-56:SPC25_6HIS_38-46	SPC25_6HIS	K	52	SPC25_6HIS	S	39	LKEEER	51-56	DSIKAFAEK	38-46	127	0.0	0.5950801677175869	TRUE	PJH_20180309_ND80SKA123_R2F4-11_RISE_MaxMissFrag1.zhrm.csv	20180321_Q3_U2_1-10_AB_SA_PJH_20180309_ND80SKA123_R2F7.12481.12481.3 File:"20180321_Q3_U2_1-10_AB_SA_PJH_20180309_ND80SKA123_R2F7.raw", NativeID:"controllerType=0 controllerNumber=1 scan=12481"
Ska:Ndc80	59	Intra	SPC25_6HIS_K_52:SPC25_6HIS_K_41	SPC25_6HIS_51-56:SPC25_6HIS_38-46	SPC25_6HIS	K	52	SPC25_6HIS	K	41	LKEEER	51-56	DSIKAFAEK	38-46	123	0.0	1.94408e+16	TRUE	PJH_20180309_ND80SKA123_R2F4-11_RISE_MaxMissFrag1.zhrm.csv	20180321_Q3_U2_1-10_AB_SA_PJH_20180309_ND80SKA123_R2F7.12288.12288.3 File:"20180321_Q3_U2_1-10_AB_SA_PJH_20180309_ND80SKA123_R2F7.raw", NativeID:"controllerType=0 controllerNumber=1 scan=12288"
Ska:Ndc80	60	Intra	SPC25_6HIS_K_52:SPC25_6HIS_K_46	SPC25_6HIS_51-56:SPC25_6HIS_42-50	SPC25_6HIS	K	52	SPC25_6HIS	K	46	LKEEER	51-56	AFAEKLSVK	42-50	121	0.0	1590836992193830	TRUE	PJH_20180309_ND80SKA123_R2F4-11_RISE_MaxMissFrag1.zhrm.csv	20180321_Q3_U2_1-2_AB_SA_PJH_20180309_ND80SKA123_R2F6.13990.13990.2 File:"20180321_Q3_U2_1-2_AB_SA_PJH_20180309_ND80SKA123_R2F6.raw", NativeID:"controllerType=0 controllerNumber=1 scan=13990"
Ska:Ndc80	61	Intra	SPC25_6HIS_K_52:SPC25_6HIS_S_48	SPC25_6HIS_51-56:SPC25_6HIS_42-50	SPC25_6HIS	K	52	SPC25_6HIS	S	48	LKEEER	51-56	AFAEKLSVK	42-50	124	0.0	0.5338303913693769	TRUE	PJH_20180309_ND80SKA123_R2F4-11_RISE_MaxMissFrag1.zhrm.csv	20180321_Q3_U2_1-2_AB_SA_PJH_20180309_ND80SKA123_R2F6.14025.14025.3 File:"20180321_Q3_U2_1-2_AB_SA_PJH_20180309_ND80SKA123_R2F6.raw", NativeID:"controllerType=0 controllerNumber=1 scan=14025"
Ska:Ndc80	62	Intra	SPC25_6HIS_K_79:SPC25_6HIS_K_73	SPC25_6HIS_79-84:SPC25_6HIS_71-78	SPC25_6HIS	K	79	SPC25_6HIS	K	73	KDNLLK	79-84	QNKLIQEK	71-78	91	0.0016460905349794238	1.74679e+16	TRUE	PJH_20180309_ND80SKA123_R2F4-11_RISE_MaxMissFrag1.zhrm.csv	20180321_Q3_U2_1-10_AB_SA_PJH_20180309_ND80SKA123_R2F7.11707.11707.4 File:"20180321_Q3_U2_1-10_AB_SA_PJH_20180309_ND80SKA123_R2F7.raw", NativeID:"controllerType=0 controllerNumber=1 scan=11707"
Ska:Ndc80	63	Intra	SPC25_6HIS_K_79:SPC25_6HIS_K_90	SPC25_6HIS_79-84:SPC25_6HIS_85-92	SPC25_6HIS	K	79	SPC25_6HIS	K	90	KDNLLK	79-84	LIAEVKGK	85-92	154	0.0	0.7928740106479147	TRUE	PJH_20180309_ND80SKA123_R2F4-11_RISE_MaxMissFrag1.zhrm.csv	20180321_Q3_U2_1-2_AB_SA_PJH_20180309_ND80SKA123_R2F6.14480.14480.2 File:"20180321_Q3_U2_1-2_AB_SA_PJH_20180309_ND80SKA123_R2F6.raw", NativeID:"controllerType=0 controllerNumber=1 scan=14480"
Ska:Ndc80	64	Intra	SPC25_6HIS_K_90:SPC25_6HIS_K_93	SPC25_6HIS_85-92:SPC25_6HIS_93-107	SPC25_6HIS	K	90	SPC25_6HIS	K	93	LIAEVKGK	85-92	KQELEVLTANIQDLK	93-107	127	0.0	1.71244e+16	TRUE	PJH_20180309_ND80SKA123_R2F4-11_RISE_MaxMissFrag1.zhrm.csv	20180321_Q3_U2_1-10_AB_SA_PJH_20180309_ND80SKA123_R2F7.25659.25659.3 File:"20180321_Q3_U2_1-10_AB_SA_PJH_20180309_ND80SKA123_R2F7.raw", NativeID:"controllerType=0 controllerNumber=1 scan=25659"
Ska:Ndc80	65	Intra	SPC25_6HIS_K_114:SPC25_6HIS_Y_110	SPC25_6HIS_114-122:SPC25_6HIS_94-112	SPC25_6HIS	K	114	SPC25_6HIS	Y	110	KETISTANK	114-122	QELEVLTANIQDLKEEYSR	94-112	54	0.04041780199818347	3.67415e+16	TRUE	PJH_20180309_ND80SKA123_R2F4-11_RISE_MaxMissFrag1.zhrm.csv	20180321_Q3_U2_1-2_AB_SA_PJH_20180309_ND80SKA123_R2F8.26015.26015.3 File:"20180321_Q3_U2_1-2_AB_SA_PJH_20180309_ND80SKA123_R2F8.raw", NativeID:"controllerType=0 controllerNumber=1 scan=26015"
Ska:Ndc80	66	Intra	SPC25_6HIS_K_148:SPC25_6HIS_K_203	SPC25_6HIS_148-153:SPC25_6HIS_203-215	SPC25_6HIS	K	148	SPC25_6HIS	K	203	KIYGEK	148-153	KTNNFSAFLANVR	203-215	71	0.013986013986013986	31183906590638	TRUE	PJH_20180309_ND80SKA123_R2F4-11_RISE_MaxMissFrag1.zhrm.csv	20180321_Q3_U2_1-10_AB_SA_PJH_20180309_ND80SKA123_R2F7.21308.21308.3 File:"20180321_Q3_U2_1-10_AB_SA_PJH_20180309_ND80SKA123_R2F7.raw", NativeID:"controllerType=0 controllerNumber=1 scan=21308"
Ska:Ndc80	67	Intra	SPC25_6HIS_K_203:SPC25_6HIS_Y_182	SPC25_6HIS_203-215:SPC25_6HIS_181-202	SPC25_6HIS	K	203	SPC25_6HIS	Y	182	KTNNFSAFLANVR	203-215	DYEVSDSAPHLEGLAEFQENVR	181-202	94	0.0017452006980802793	1.72872e+16	TRUE	PJH_20180309_ND80SKA123_R2F4-11_RISE_MaxMissFrag1.zhrm.csv	20180321_Q3_U2_1-10_AB_SA_PJH_20180309_ND80SKA123_R2F7.30845.30845.5 File:"20180321_Q3_U2_1-10_AB_SA_PJH_20180309_ND80SKA123_R2F7.raw", NativeID:"controllerType=0 controllerNumber=1 scan=30845"
Ska:Ndc80	68	Intra	SPC25_6HIS_K_203:SPC25_6HIS_K_203	SPC25_6HIS_203-215:SPC25_6HIS_203-215	SPC25_6HIS	K	203	SPC25_6HIS	K	203	KTNNFSAFLANVR	203-215	KTNNFSAFLANVR	203-215	120	0.0	1.53801e+16	TRUE	PJH_20180309_ND80SKA123_R2F4-11_RISE_MaxMissFrag1.zhrm.csv	20180321_Q3_U2_1-10_AB_SA_PJH_20180309_ND80SKA123_R2F7.30059.30059.3 File:"20180321_Q3_U2_1-10_AB_SA_PJH_20180309_ND80SKA123_R2F7.raw", NativeID:"controllerType=0 controllerNumber=1 scan=30059"
Ska:Ndc80	69	Intra	SPC25_6HIS_K_203:SPC25_6HIS_T_221	SPC25_6HIS_203-215:SPC25_6HIS_216-231	SPC25_6HIS	K	203	SPC25_6HIS	T	221	KTNNFSAFLANVR	203-215	KAFTATVYNHHHHHH	216-231	106	0.0024509803921568627	1.15151e+16	TRUE	PJH_20180309_ND80SKA123_R2F4-11_RISE_MaxMissFrag1.zhrm.csv	20180321_Q3_U2_1-2_AB_SA_PJH_20180309_ND80SKA123_R2F6.15698.15698.4 File:"20180321_Q3_U2_1-2_AB_SA_PJH_20180309_ND80SKA123_R2F6.raw", NativeID:"controllerType=0 controllerNumber=1 scan=15698"
Ska:Ndc80	70	Intra	SPC25_6HIS_K_203:SPC25_6HIS_Y_223	SPC25_6HIS_203-215:SPC25_6HIS_216-231	SPC25_6HIS	K	203	SPC25_6HIS	Y	223	KTNNFSAFLANVR	203-215	KAFTATVYNHHHHHH	216-231	113	0.001658374792703151	1.6402e+16	TRUE	PJH_20180309_ND80SKA123_R2F4-11_RISE_MaxMissFrag1.zhrm.csv	20180321_Q3_U2_1-2_AB_SA_PJH_20180309_ND80SKA123_R2F6.15510.15510.4 File:"20180321_Q3_U2_1-2_AB_SA_PJH_20180309_ND80SKA123_R2F6.raw", NativeID:"controllerType=0 controllerNumber=1 scan=15510"
Ska:Ndc80	71	Intra	SPC25_6HIS_S_208:SPC25_6HIS_K_216	SPC25_6HIS_203-215:SPC25_6HIS_216-231	SPC25_6HIS	S	208	SPC25_6HIS	K	216	KTNNFSAFLANVR	203-215	KAFTATVYNHHHHHH	216-231	82	0.0041753653444676405	1.5139e+16	TRUE	PJH_20180309_ND80SKA123_R2F4-11_RISE_MaxMissFrag1.zhrm.csv	20180321_Q3_U2_1-2_AB_SA_PJH_20180309_ND80SKA123_R2F6.15699.15699.3 File:"20180321_Q3_U2_1-2_AB_SA_PJH_20180309_ND80SKA123_R2F6.raw", NativeID:"controllerType=0 controllerNumber=1 scan=15699"
Ndc80	1	Inter	Spc24_K_98:Ndc80_T_350	Spc24_97-106:Ndc80_338-351	Spc24	K	98	Ndc80	T	350	LKASLLQLTR	97-106	LLEMVATHVGSVEKHLEEQIAK	585-606	48	3.22581e+16	4.82168e+16	TRUE	NDC80C_F4.zhrm.csv	20180202_Q2_U1_1-10_AB_SA_DOP_20180126_Ndc80-F8-id.18821.18821.5 File:"20180202_Q2_U1_1-10_AB_SA_DOP_20180126_Ndc80-F8-id.raw", NativeID:"controllerType=0 controllerNumber=1 scan=18821"
Ndc80	2	Inter	Spc24_K_98:Ndc80_K_288	Spc24_97-106:Ndc80_287-297	Spc24	K	98	Ndc80	K	288	LKASLLQLTR	97-106	EIRDKYEK	625-632	89	0	5.428e+16	TRUE	NDC80C_F6.zhrm.csv	20180202_Q2_U1_1-10_AB_SA_DOP_20180126_Ndc80-F6-id.13579.13579.3 File:"20180202_Q2_U1_1-10_AB_SA_DOP_20180126_Ndc80-F6-id.raw", NativeID:"controllerType=0 controllerNumber=1 scan=13579"
Ndc80	3	Inter	Spc24_K_50:Spc25_T_221	Spc24_41-53:Spc25_216-231	Spc24	K	50	Spc25	T	221	LLETQDGAEKQLR	41-53	MFKmST	459-465	118	0	4.57046e+16	TRUE	NDC80C_F5.zhrm.csv	20180202_Q2_U1_1-2_AB_SA_DOP_20180126_Ndc80-F7-id.17325.17325.3 File:"20180202_Q2_U1_1-2_AB_SA_DOP_20180126_Ndc80-F7-id.raw", NativeID:"controllerType=0 controllerNumber=1 scan=17325"
Ndc80	4	Inter	Spc24_K_50:Ndc80_S_21	Spc24_41-53:Ndc80_14-26	Spc24	K	50	Ndc80	S	21	LLETQDGAEKQLR	41-53	LLETQDGAEKQLR	41-53	69	1.85923e+16	4.73405e+16	TRUE	NDC80C_F5.zhrm.csv	20180202_Q2_U1_1-2_AB_SA_DOP_20180126_Ndc80-F7-id.13385.13385.3 File:"20180202_Q2_U1_1-2_AB_SA_DOP_20180126_Ndc80-F7-id.raw", NativeID:"controllerType=0 controllerNumber=1 scan=13385"
Ndc80	5	Inter	Ndc80_K_577:Nuf2_K_409	Ndc80_577-584:Nuf2_403-414	Ndc80	K	577	Nuf2	K	409	KVGNNLQR	577-584	LLETQDGAEKQLR	41-53	101	1.89394e+16	5.6659e+16	TRUE	NDC80C_F5.zhrm.csv	20180202_Q2_U1_1-2_AB_SA_DOP_20180126_Ndc80-F7-id.9675.9675.3 File:"20180202_Q2_U1_1-2_AB_SA_DOP_20180126_Ndc80-F7-id.raw", NativeID:"controllerType=0 controllerNumber=1 scan=9675"
Ndc80	6	Inter	Spc24_K_50:Ndc80_K_624	Spc24_41-53:Ndc80_610-627	Spc24	K	50	Ndc80	K	624	LLETQDGAEKQLR	41-53	ELEELKEIEADLER	107-120	114	0	7.74316e+16	TRUE	NDC80C_F5.zhrm.csv	20180202_Q2_U1_1-2_AB_SA_DOP_20180126_Ndc80-F7-id.29488.29488.3 File:"20180202_Q2_U1_1-2_AB_SA_DOP_20180126_Ndc80-F7-id.raw", NativeID:"controllerType=0 controllerNumber=1 scan=29488"
Ndc80	7	Inter	Spc24_K_50:Ndc80_K_346	Spc24_41-53:Ndc80_338-351	Spc24	K	50	Ndc80	K	346	LLETQDGAEKQLR	41-53	KVGNNLQR	577-584	56	3.21489e+16	5.0622e+16	TRUE	NDC80C_F6.zhrm.csv	20180202_Q2_U1_1-10_AB_SA_DOP_20180126_Ndc80-F6-id.3405.3405.3 File:"20180202_Q2_U1_1-10_AB_SA_DOP_20180126_Ndc80-F6-id.raw", NativeID:"controllerType=0 controllerNumber=1 scan=3405"
Ndc80	8	Inter	Spc24_K_112:Spc25_K_216	Spc24_107-120:Spc25_216-231	Spc24	K	112	Spc25	K	216	ELEELKEIEADLER	107-120	VSLFGKR	54-60	137	0	5.2389e+16	TRUE	NDC80C_F6.zhrm.csv	20180202_Q2_U1_1-10_AB_SA_DOP_20180126_Ndc80-F6-id.8348.8348.3 File:"20180202_Q2_U1_1-10_AB_SA_DOP_20180126_Ndc80-F6-id.raw", NativeID:"controllerType=0 controllerNumber=1 scan=8348"
Ndc80	9	Inter	Nuf2_Y_388:Spc25_K_203	Nuf2_385-390:Spc25_203-215	Nuf2	Y	388	Spc25	K	203	GAVYER	385-390	EKEPNRLESLR	287-297	67	1.48148e+16	6.17746e+16	TRUE	NDC80C_F6.zhrm.csv	20180202_Q2_U1_1-10_AB_SA_DOP_20180126_Ndc80-F6-id.6490.6490.4 File:"20180202_Q2_U1_1-10_AB_SA_DOP_20180126_Ndc80-F6-id.raw", NativeID:"controllerType=0 controllerNumber=1 scan=6490"
Ndc80	10	Inter	Ndc80_K_577:Nuf2_K_427	Ndc80_577-584:Nuf2_419-432	Ndc80	K	577	Nuf2	K	427	KVGNNLQR	577-584	VELEBETIKQENTR	338-351	126	0	6.71896e+16	TRUE	NDC80C_F6.zhrm.csv	20180202_Q2_U1_1-10_AB_SA_DOP_20180126_Ndc80-F6-id.9152.9152.3 File:"20180202_Q2_U1_1-10_AB_SA_DOP_20180126_Ndc80-F6-id.raw", NativeID:"controllerType=0 controllerNumber=1 scan=9152"
Ndc80	11	Inter	Ndc80_K_577:Nuf2_T_428	Ndc80_577-584:Nuf2_419-432	Ndc80	K	577	Nuf2	T	428	KVGNNLQR	577-584	VSLFGKRTSGHGSR	54-67	45	0	2697203745029720	TRUE	NDC80C_F3.zhrm.csv	20180202_Q2_U1_1-2_AB_SA_DOP_20180126_Ndc80-F9-id.25485.25485.3 File:"20180202_Q2_U1_1-2_AB_SA_DOP_20180126_Ndc80-F9-id.raw", NativeID:"controllerType=0 controllerNumber=1 scan=25485"
Ndc80	12	Inter	Ndc80_K_577:Nuf2_K_416	Ndc80_577-584:Nuf2_410-418	Ndc80	K	577	Nuf2	K	416	KVGNNLQR	577-584	LKDLFNVDAFK	254-264	108	0	4.63721e+16	TRUE	NDC80C_F5.zhrm.csv	20180202_Q2_U1_1-2_AB_SA_DOP_20180126_Ndc80-F7-id.21604.21604.4 File:"20180202_Q2_U1_1-2_AB_SA_DOP_20180126_Ndc80-F7-id.raw", NativeID:"controllerType=0 controllerNumber=1 scan=21604"
Ndc80	13	Inter	Spc25_S_39:Spc24_K_50	Spc25_34-41:Spc24_41-53	Spc25	S	39	Spc24	K	50	DTYKDSIK	34-41	EKEPNR	287-292	114	0	5.76243e+16	TRUE	NDC80C_F6.zhrm.csv	20180202_Q2_U1_1-10_AB_SA_DOP_20180126_Ndc80-F6-id.7308.7308.3 File:"20180202_Q2_U1_1-10_AB_SA_DOP_20180126_Ndc80-F6-id.raw", NativeID:"controllerType=0 controllerNumber=1 scan=7308"
Ndc80	14	Inter	Ndc80_K_577:Nuf2_K_342	Ndc80_577-584:Nuf2_336-343	Ndc80	K	577	Nuf2	K	342	KVGNNLQR	577-584	LQNIIDNQKYSVADIER	352-368	88	0	7.26282e+16	TRUE	NDC80C_F7.zhrm.csv	20180202_Q2_U1_1-2_AB_SA_DOP_20180126_Ndc80-F5-id.20644.20644.4 File:"20180202_Q2_U1_1-2_AB_SA_DOP_20180126_Ndc80-F5-id.raw", NativeID:"controllerType=0 controllerNumber=1 scan=20644"
Ndc80	15	Inter	Ndc80_K_288:Spc24_K_50	Ndc80_287-297:Spc24_41-53	Ndc80	K	288	Spc24	K	50	EKEPNRLESLR	287-297	LQNIIDNQKYSVADIER	352-368	108	0	4.71658e+16	TRUE	NDC80C_F4.zhrm.csv	20180202_Q2_U1_1-10_AB_SA_DOP_20180126_Ndc80-F8-id.16582.16582.4 File:"20180202_Q2_U1_1-10_AB_SA_DOP_20180126_Ndc80-F8-id.raw", NativeID:"controllerType=0 controllerNumber=1 scan=16582"
Ndc80	16	Inter	Ndc80_K_288:Spc25_K_203	Ndc80_287-292:Spc25_203-215	Ndc80	K	288	Spc25	K	203	EKEPNR	287-292	LQNIIDNQKYSVADIER	352-368	128	0	6.83909e+16	TRUE	NDC80C_F4.zhrm.csv	20180202_Q2_U1_1-10_AB_SA_DOP_20180126_Ndc80-F8-id.16442.16442.3 File:"20180202_Q2_U1_1-10_AB_SA_DOP_20180126_Ndc80-F8-id.raw", NativeID:"controllerType=0 controllerNumber=1 scan=16442"
Ndc80	17	Inter	Spc25_K_21:Ndc80_T_591	Spc25_20-33:Ndc80_585-606	Spc25	K	21	Ndc80	T	591	FKSTDTSBQMAGLR	20-33	LQNIIDNQKYSVADIER	352-368	109	0	6.86721e+16	TRUE	NDC80C_F4.zhrm.csv	20180202_Q2_U1_1-10_AB_SA_DOP_20180126_Ndc80-F8-id.20030.20030.4 File:"20180202_Q2_U1_1-10_AB_SA_DOP_20180126_Ndc80-F8-id.raw", NativeID:"controllerType=0 controllerNumber=1 scan=20030"
Ndc80	18	Inter	Spc25_K_203:Spc24_K_112	Spc25_203-215:Spc24_107-120	Spc25	K	203	Spc24	K	112	KTNNFSAFLANVR	203-215	DLEAEQQKLWNEELK	386-400	116	0	7.68113e+16	TRUE	NDC80C_F5.zhrm.csv	20180202_Q2_U1_1-2_AB_SA_DOP_20180126_Ndc80-F7-id.26494.26494.3 File:"20180202_Q2_U1_1-2_AB_SA_DOP_20180126_Ndc80-F7-id.raw", NativeID:"controllerType=0 controllerNumber=1 scan=26494"
Ndc80	19	Inter	Ndc80_K_504:Nuf2_K_400	Ndc80_502-509:Nuf2_391-402	Ndc80	K	504	Nuf2	K	400	TLKEEVQK	502-509	DLEAEQQKLWNEELK	386-400	101	0	7.41906e+16	TRUE	NDC80C_F6.zhrm.csv	20180202_Q2_U1_1-10_AB_SA_DOP_20180126_Ndc80-F6-id.27029.27029.4 File:"20180202_Q2_U1_1-10_AB_SA_DOP_20180126_Ndc80-F6-id.raw", NativeID:"controllerType=0 controllerNumber=1 scan=27029"
Ndc80	20	Inter	Nuf2_Y_254:Ndc80_K_360	Nuf2_251-255:Ndc80_352-368	Nuf2	Y	254	Ndc80	K	360	LKNYK	251-255	VELEBETIKQENTR	338-351	115	0	4.32957e+16	TRUE	NDC80C_F5.zhrm.csv	20180202_Q2_U1_1-2_AB_SA_DOP_20180126_Ndc80-F7-id.13341.13341.3 File:"20180202_Q2_U1_1-2_AB_SA_DOP_20180126_Ndc80-F7-id.raw", NativeID:"controllerType=0 controllerNumber=1 scan=13341"
Ndc80	21	Inter	Spc25_K_52:Spc24_K_50	Spc25_51-56:Spc24_41-53	Spc25	K	52	Spc24	K	50	LKEEER	51-56	LTKDLEAEQQK	383-393	95	0	4.52423e+16	TRUE	NDC80C_F4.zhrm.csv	20180202_Q2_U1_1-10_AB_SA_DOP_20180126_Ndc80-F8-id.28170.28170.3 File:"20180202_Q2_U1_1-10_AB_SA_DOP_20180126_Ndc80-F8-id.raw", NativeID:"controllerType=0 controllerNumber=1 scan=28170"
Ndc80	22	Inter	Spc25_K_21:Ndc80_K_598	Spc25_20-33:Ndc80_585-606	Spc25	K	21	Ndc80	K	598	FKSTDTSBQMAGLR	20-33	GKEAIETQLAEYHK	404-417	110	0	7.40564e+16	TRUE	NDC80C_F6.zhrm.csv	20180202_Q2_U1_1-10_AB_SA_DOP_20180126_Ndc80-F6-id.20208.20208.4 File:"20180202_Q2_U1_1-10_AB_SA_DOP_20180126_Ndc80-F6-id.raw", NativeID:"controllerType=0 controllerNumber=1 scan=20208"
Ndc80	23	Inter	Spc25_K_50:Nuf2_K_461	Spc25_47-52:Nuf2_459-465	Spc25	K	50	Nuf2	K	461	LSVKLK	47-52	GKEAIETQLAEYHK	404-417	87	0	7.06574e+16	TRUE	NDC80C_F6.zhrm.csv	20180202_Q2_U1_1-10_AB_SA_DOP_20180126_Ndc80-F6-id.20218.20218.5 File:"20180202_Q2_U1_1-10_AB_SA_DOP_20180126_Ndc80-F6-id.raw", NativeID:"controllerType=0 controllerNumber=1 scan=20218"
Ndc80	24	Inter	Spc25_K_21:Ndc80_S_595	Spc25_20-33:Ndc80_585-606	Spc25	K	21	Ndc80	S	595	FKSTDTSBQMAGLR	20-33	EAIETQLAEYHKLAR	406-420	82	2.1097e+16	5.68182e+16	TRUE	NDC80C_F6.zhrm.csv	20180202_Q2_U1_1-10_AB_SA_DOP_20180126_Ndc80-F6-id.19883.19883.3 File:"20180202_Q2_U1_1-10_AB_SA_DOP_20180126_Ndc80-F6-id.raw", NativeID:"controllerType=0 controllerNumber=1 scan=19883"
Ndc80	25	Inter	Nuf2_Y_388:Ndc80_K_504	Nuf2_385-390:Ndc80_502-509	Nuf2	Y	388	Ndc80	K	504	GAVYER	385-390	GYDFEIKFNPEAGANBLVK	434-452	101	0	5.00241e+16	TRUE	NDC80C_F4.zhrm.csv	20180202_Q2_U1_1-10_AB_SA_DOP_20180126_Ndc80-F8-id.18687.18687.3 File:"20180202_Q2_U1_1-10_AB_SA_DOP_20180126_Ndc80-F8-id.raw", NativeID:"controllerType=0 controllerNumber=1 scan=18687"
Ndc80	26	Inter	Ndc80_K_577:Spc24_T_105	Ndc80_577-584:Spc24_97-106	Ndc80	K	577	Spc24	T	105	KVGNNLQR	577-584	FNPEAGANBLVKYR	441-454	117	0	4.20065e+16	TRUE	NDC80C_F5.zhrm.csv	20180202_Q2_U1_1-2_AB_SA_DOP_20180126_Ndc80-F7-id.15214.15214.3 File:"20180202_Q2_U1_1-2_AB_SA_DOP_20180126_Ndc80-F7-id.raw", NativeID:"controllerType=0 controllerNumber=1 scan=15214"
Ndc80	27	Inter	Nuf2_T_452:Spc25_K_21	Nuf2_452-457:Spc25_20-33	Nuf2	T	452	Spc25	K	21	TAELKR	452-457	FNPEAGANBLVKYR	441-454	86	0	5.09362e+16	TRUE	NDC80C_F6.zhrm.csv	20180202_Q2_U1_1-10_AB_SA_DOP_20180126_Ndc80-F6-id.17658.17658.3 File:"20180202_Q2_U1_1-10_AB_SA_DOP_20180126_Ndc80-F6-id.raw", NativeID:"controllerType=0 controllerNumber=1 scan=17658"
Ndc80	28	Inter	Ndc80_S_4:Spc25_K_203	Ndc80_4-13:Spc25_203-215	Ndc80	S	4	Spc25	K	203	SSVSSGGAGR	4-13	KVGNNLQR	577-584	80	2.03252e+16	6.47491e+16	TRUE	NDC80C_F6.zhrm.csv	20180202_Q2_U1_1-10_AB_SA_DOP_20180126_Ndc80-F6-id.6421.6421.3 File:"20180202_Q2_U1_1-10_AB_SA_DOP_20180126_Ndc80-F6-id.raw", NativeID:"controllerType=0 controllerNumber=1 scan=6421"
Ndc80	29	Inter	Nuf2_K_400:Ndc80_T_571	Nuf2_391-402:Ndc80_563-575	Nuf2	K	400	Ndc80	T	571	VTTINQEIQKIK	391-402	MGLEDTLEQLNAMITESKR	480-498	131	0	5.27619e+16	TRUE	NDC80C_F5.zhrm.csv	20180202_Q2_U1_1-2_AB_SA_DOP_20180126_Ndc80-F7-id.29739.29739.4 File:"20180202_Q2_U1_1-2_AB_SA_DOP_20180126_Ndc80-F7-id.raw", NativeID:"controllerType=0 controllerNumber=1 scan=29739"
Ndc80	30	Inter	Nuf2_K_400:Ndc80_T_570	Nuf2_391-402:Ndc80_563-575	Nuf2	K	400	Ndc80	T	570	VTTINQEIQKIK	391-402	MGLEDTLEQLNAMITESKR	480-498	112	0	5.40342e+16	TRUE	NDC80C_F5.zhrm.csv	20180202_Q2_U1_1-2_AB_SA_DOP_20180126_Ndc80-F7-id.29620.29620.3 File:"20180202_Q2_U1_1-2_AB_SA_DOP_20180126_Ndc80-F7-id.raw", NativeID:"controllerType=0 controllerNumber=1 scan=29620"
Ndc80	31	Inter	Ndc80_K_638:Spc24_K_50	Ndc80_634-643:Spc24_41-53	Ndc80	K	638	Spc24	K	50	ATLIKSSEE	634-643	VELEBETIKQENTR	338-351	113	0	5.80227e+16	TRUE	NDC80C_F5.zhrm.csv	20180202_Q2_U1_1-2_AB_SA_DOP_20180126_Ndc80-F7-id.10631.10631.4 File:"20180202_Q2_U1_1-2_AB_SA_DOP_20180126_Ndc80-F7-id.raw", NativeID:"controllerType=0 controllerNumber=1 scan=10631"
Ndc80	32	Inter	Ndc80_K_638:Spc25_K_73	Ndc80_634-643:Spc25_71-78	Ndc80	K	638	Spc25	K	73	ATLIKSSEE	634-643	LQNIIDNQKYSVADIER	352-368	106	2136752136752130	5.99852e+16	TRUE	NDC80C_F5.zhrm.csv	20180202_Q2_U1_1-2_AB_SA_DOP_20180126_Ndc80-F7-id.16603.16603.4 File:"20180202_Q2_U1_1-2_AB_SA_DOP_20180126_Ndc80-F7-id.raw", NativeID:"controllerType=0 controllerNumber=1 scan=16603"
Ndc80	33	Inter	Nuf2_K_348:Ndc80_K_504	Nuf2_344-349:Ndc80_502-509	Nuf2	K	348	Ndc80	K	504	LMIVKK	344-349	TLKEEVQK	502-509	111	0	4.93646e+16	TRUE	NDC80C_F6.zhrm.csv	20180202_Q2_U1_1-10_AB_SA_DOP_20180126_Ndc80-F6-id.9716.9716.3 File:"20180202_Q2_U1_1-10_AB_SA_DOP_20180126_Ndc80-F6-id.raw", NativeID:"controllerType=0 controllerNumber=1 scan=9716"
Ndc80	34	Inter	Nuf2_K_299:Ndc80_T_468	Nuf2_299-307:Ndc80_455-474	Nuf2	K	299	Ndc80	T	468	KIQDLSDNR	299-307	LLEMVATHVGSVEK	585-598	84	0	5.42137e+16	TRUE	NDC80C_F6.zhrm.csv	20180202_Q2_U1_1-10_AB_SA_DOP_20180126_Ndc80-F6-id.17245.17245.4 File:"20180202_Q2_U1_1-10_AB_SA_DOP_20180126_Ndc80-F6-id.raw", NativeID:"controllerType=0 controllerNumber=1 scan=17245"
Ndc80	35	Inter	Nuf2_K_299:Ndc80_K_462	Nuf2_299-307:Ndc80_455-474	Nuf2	K	299	Ndc80	K	462	KIQDLSDNR	299-307	DKYEK	628-632	147	0	5.98406e+16	TRUE	NDC80C_F7.zhrm.csv	20180202_Q2_U1_1-2_AB_SA_DOP_20180126_Ndc80-F5-id.10623.10623.2 File:"20180202_Q2_U1_1-2_AB_SA_DOP_20180126_Ndc80-F5-id.raw", NativeID:"controllerType=0 controllerNumber=1 scan=10623"
Ndc80	36	Inter	Nuf2_K_266:Ndc80_K_382	Nuf2_265-269:Ndc80_374-385	Nuf2	K	266	Ndc80	K	382	LKNAR	265-269	EIRDKYEK	625-632	123	0	6.54664e+16	TRUE	NDC80C_F6.zhrm.csv	20180202_Q2_U1_1-10_AB_SA_DOP_20180126_Ndc80-F6-id.10058.10058.2 File:"20180202_Q2_U1_1-10_AB_SA_DOP_20180126_Ndc80-F6-id.raw", NativeID:"controllerType=0 controllerNumber=1 scan=10058"
Ndc80	37	Inter	Nuf2_K_252:Ndc80_S_362	Nuf2_251-255:Ndc80_352-368	Nuf2	K	252	Ndc80	S	362	LKNYK	251-255	VQEKR	380-384	70	1.76152e+16	2.05539e+16	TRUE	NDC80C_F5.zhrm.csv	20180202_Q2_U1_1-2_AB_SA_DOP_20180126_Ndc80-F7-id.14321.14321.2 File:"20180202_Q2_U1_1-2_AB_SA_DOP_20180126_Ndc80-F7-id.raw", NativeID:"controllerType=0 controllerNumber=1 scan=14321"
Ndc80	38	Inter	Nuf2_K_252:Ndc80_K_360	Nuf2_251-255:Ndc80_352-368	Nuf2	K	252	Ndc80	K	360	LKNYK	251-255	TVIEDBNK	372-379	74	823045267489712	4.50206e+16	TRUE	NDC80C_F5.zhrm.csv	20180202_Q2_U1_1-2_AB_SA_DOP_20180126_Ndc80-F7-id.6537.6537.3 File:"20180202_Q2_U1_1-2_AB_SA_DOP_20180126_Ndc80-F7-id.raw", NativeID:"controllerType=0 controllerNumber=1 scan=6537"
Ndc80	39	Inter	Nuf2_K_243:Ndc80_T_350	Nuf2_242-250:Ndc80_338-351	Nuf2	K	243	Ndc80	T	350	TKIVDSPEK	242-250	GAVYER	385-390	126	0	5.87417e+16	TRUE	NDC80C_F6.zhrm.csv	20180202_Q2_U1_1-10_AB_SA_DOP_20180126_Ndc80-F6-id.6483.6483.4 File:"20180202_Q2_U1_1-10_AB_SA_DOP_20180126_Ndc80-F6-id.raw", NativeID:"controllerType=0 controllerNumber=1 scan=6483"
Ndc80	40	Inter	Nuf2_K_219:Spc24_K_50	Nuf2_214-221:Spc24_41-53	Nuf2	K	219	Spc24	K	50	SNISEKTK	214-221	VTTINQEIQKIK	391-402	107	0	5681262162773530	TRUE	NDC80C_F6.zhrm.csv	20180202_Q2_U1_1-10_AB_SA_DOP_20180126_Ndc80-F6-id.14245.14245.3 File:"20180202_Q2_U1_1-10_AB_SA_DOP_20180126_Ndc80-F6-id.raw", NativeID:"controllerType=0 controllerNumber=1 scan=14245"
Ndc80	41	Inter	Nuf2_K_213:Spc24_K_50	Nuf2_213-219:Spc24_41-53	Nuf2	K	213	Spc24	K	50	KSNISEK	213-219	TEENSFKR	336-343	66	1.4652e+16	6.49352e+16	TRUE	NDC80C_F6.zhrm.csv	20180202_Q2_U1_1-10_AB_SA_DOP_20180126_Ndc80-F6-id.10466.10466.3 File:"20180202_Q2_U1_1-10_AB_SA_DOP_20180126_Ndc80-F6-id.raw", NativeID:"controllerType=0 controllerNumber=1 scan=10466"
Ndc80	42	Inter	Ndc80_S_295:Nuf2_K_165	Ndc80_287-297:Nuf2_152-168	Ndc80	S	295	Nuf2	K	165	EKEPNRLESLR	287-297	VTTINQEIQKIK	391-402	113	0	6.30034e+16	TRUE	NDC80C_F4.zhrm.csv	20180202_Q2_U1_1-10_AB_SA_DOP_20180126_Ndc80-F8-id.14177.14177.3 File:"20180202_Q2_U1_1-10_AB_SA_DOP_20180126_Ndc80-F8-id.raw", NativeID:"controllerType=0 controllerNumber=1 scan=14177"
Ndc80	43	Inter	Ndc80_S_295:Nuf2_K_400	Ndc80_287-297:Nuf2_391-402	Ndc80	S	295	Nuf2	K	400	EKEPNRLESLR	287-297	TALEKYHDGIEK	428-439	106	2136752136752130	5169812256201890	TRUE	NDC80C_F5.zhrm.csv	20180202_Q2_U1_1-2_AB_SA_DOP_20180126_Ndc80-F7-id.17400.17400.5 File:"20180202_Q2_U1_1-2_AB_SA_DOP_20180126_Ndc80-F7-id.raw", NativeID:"controllerType=0 controllerNumber=1 scan=17400"
Ndc80	44	Inter	Ndc80_S_7:Spc25_K_203	Ndc80_4-13:Spc25_203-215	Ndc80	S	7	Spc25	K	203	SSVSSGGAGR	4-13	MFKmST	459-465	51	2.38095e+16	3.18639e+16	TRUE	NDC80C_F8.zhrm.csv	20180202_Q2_U1_1-10_AB_SA_DOP_20180126_Ndc80-F4-id.10245.10245.2 File:"20180202_Q2_U1_1-10_AB_SA_DOP_20180126_Ndc80-F4-id.raw", NativeID:"controllerType=0 controllerNumber=1 scan=10245"
Ndc80	45	Inter	Ndc80_S_66:Spc25_K_52	Ndc80_61-67:Spc25_51-56	Ndc80	S	66	Spc25	K	52	TSGHGSR	61-67	AAEDSYAK	440-447	122	0	5.25358e+16	TRUE	NDC80C_F6.zhrm.csv	20180202_Q2_U1_1-10_AB_SA_DOP_20180126_Ndc80-F6-id.8843.8843.3 File:"20180202_Q2_U1_1-10_AB_SA_DOP_20180126_Ndc80-F6-id.raw", NativeID:"controllerType=0 controllerNumber=1 scan=8843"
Ndc80	46	Inter	Ndc80_S_66:Spc25_K_216	Ndc80_61-67:Spc25_216-231	Ndc80	S	66	Spc25	K	216	TSGHGSR	61-67	AAEDSYAK	440-447	135	0	4.92776e+16	TRUE	NDC80C_F6.zhrm.csv	20180202_Q2_U1_1-10_AB_SA_DOP_20180126_Ndc80-F6-id.10268.10268.2 File:"20180202_Q2_U1_1-10_AB_SA_DOP_20180126_Ndc80-F6-id.raw", NativeID:"controllerType=0 controllerNumber=1 scan=10268"
Ndc80	47	Inter	Ndc80_S_66:Nuf2_K_456	Ndc80_61-67:Nuf2_452-457	Ndc80	S	66	Nuf2	K	456	TSGHGSR	61-67	AAEDSYAKIDEK	440-451	62	2.12766e+16	6.10252e+16	TRUE	NDC80C_F6.zhrm.csv	20180202_Q2_U1_1-10_AB_SA_DOP_20180126_Ndc80-F6-id.11643.11643.2 File:"20180202_Q2_U1_1-10_AB_SA_DOP_20180126_Ndc80-F6-id.raw", NativeID:"controllerType=0 controllerNumber=1 scan=11643"
Ndc80	48	Inter	Nuf2_K_400:Ndc80_T_572	Nuf2_391-402:Ndc80_563-575	Nuf2	K	400	Ndc80	T	572	VTTINQEIQKIK	391-402	MFKmST	459-465	154	0	5.63133e+16	TRUE	NDC80C_F6.zhrm.csv	20180202_Q2_U1_1-10_AB_SA_DOP_20180126_Ndc80-F6-id.11865.11865.2 File:"20180202_Q2_U1_1-10_AB_SA_DOP_20180126_Ndc80-F6-id.raw", NativeID:"controllerType=0 controllerNumber=1 scan=11865"
Ndc80	49	Inter	Ndc80_K_288:Nuf2_K_165	Ndc80_287-292:Nuf2_152-168	Ndc80	K	288	Nuf2	K	165	EKEPNR	287-292	MFKmST	459-465	118	0	4.74049e+16	TRUE	NDC80C_F5.zhrm.csv	20180202_Q2_U1_1-2_AB_SA_DOP_20180126_Ndc80-F7-id.12717.12717.3 File:"20180202_Q2_U1_1-2_AB_SA_DOP_20180126_Ndc80-F7-id.raw", NativeID:"controllerType=0 controllerNumber=1 scan=12717"
Ndc80	50	Inter	Ndc80_K_633:Spc25_K_52	Ndc80_633-638:Spc25_51-56	Ndc80	K	633	Spc25	K	52	KATLIK	633-638	ALQIVYGIR	52-60	48	3.22581e+16	1.5297e+16	TRUE	NDC80C_F4.zhrm.csv	20180202_Q2_U1_1-10_AB_SA_DOP_20180126_Ndc80-F8-id.20358.20358.3 File:"20180202_Q2_U1_1-10_AB_SA_DOP_20180126_Ndc80-F8-id.raw", NativeID:"controllerType=0 controllerNumber=1 scan=20358"
Ndc80	51	Inter	Nuf2_K_461:Ndc80_K_577	Nuf2_457-461:Ndc80_577-584	Nuf2	K	461	Ndc80	K	577	RKmFK	457-461	TAELKRK	452-458	129	0	5.01004e+16	TRUE	NDC80C_F6.zhrm.csv	20180202_Q2_U1_1-10_AB_SA_DOP_20180126_Ndc80-F6-id.11900.11900.2 File:"20180202_Q2_U1_1-10_AB_SA_DOP_20180126_Ndc80-F6-id.raw", NativeID:"controllerType=0 controllerNumber=1 scan=11900"
Ndc80	52	Inter	Ndc80_K_577:Spc25_K_216	Ndc80_577-584:Spc25_216-231	Ndc80	K	577	Spc25	K	216	KVGNNLQR	577-584	LLETQDGAEKQLR	41-53	127	0	5.42527e+16	TRUE	NDC80C_F4.zhrm.csv	20180202_Q2_U1_1-10_AB_SA_DOP_20180126_Ndc80-F8-id.15395.15395.3 File:"20180202_Q2_U1_1-10_AB_SA_DOP_20180126_Ndc80-F8-id.raw", NativeID:"controllerType=0 controllerNumber=1 scan=15395"
Ndc80	53	Inter	Nuf2_S_340:Spc24_K_98	Nuf2_336-343:Spc24_97-106	Nuf2	S	340	Spc24	K	98	TEENSFKR	336-343	LLETQDGAEKQLR	41-53	92	0	6.30953e+16	TRUE	NDC80C_F4.zhrm.csv	20180202_Q2_U1_1-10_AB_SA_DOP_20180126_Ndc80-F8-id.15953.15953.4 File:"20180202_Q2_U1_1-10_AB_SA_DOP_20180126_Ndc80-F8-id.raw", NativeID:"controllerType=0 controllerNumber=1 scan=15953"
Ndc80	54	Inter	Nuf2_K_461:Spc25_S_48	Nuf2_459-465:Spc25_42-50	Nuf2	K	461	Spc25	S	48	mFKMST	459-465	ELEELKEIEADLER	107-120	135	0	9.97894e+16	TRUE	NDC80C_F4.zhrm.csv	20180202_Q2_U1_1-10_AB_SA_DOP_20180126_Ndc80-F8-id.24796.24796.3 File:"20180202_Q2_U1_1-10_AB_SA_DOP_20180126_Ndc80-F8-id.raw", NativeID:"controllerType=0 controllerNumber=1 scan=24796"
Ndc80	55	Inter	Nuf2_K_461:Spc25_K_52	Nuf2_459-465:Spc25_51-56	Nuf2	K	461	Spc25	K	52	MFKMST	459-465	AFAEKLSVK	42-50	83	0	6.95455e+16	TRUE	NDC80C_F6.zhrm.csv	20180202_Q2_U1_1-10_AB_SA_DOP_20180126_Ndc80-F6-id.16990.16990.4 File:"20180202_Q2_U1_1-10_AB_SA_DOP_20180126_Ndc80-F6-id.raw", NativeID:"controllerType=0 controllerNumber=1 scan=16990"
Ndc80	56	Inter	Nuf2_K_461:Spc25_K_46	Nuf2_459-465:Spc25_42-50	Nuf2	K	461	Spc25	K	46	MFKMST	459-465	AFAEKLSVK	42-50	87	0	7.57443e+16	TRUE	NDC80C_F6.zhrm.csv	20180202_Q2_U1_1-10_AB_SA_DOP_20180126_Ndc80-F6-id.17001.17001.3 File:"20180202_Q2_U1_1-10_AB_SA_DOP_20180126_Ndc80-F6-id.raw", NativeID:"controllerType=0 controllerNumber=1 scan=17001"
Ndc80	57	Inter	Nuf2_K_461:Spc24_K_50	Nuf2_459-465:Spc24_41-53	Nuf2	K	461	Spc24	K	50	mFKMST	459-465	AFAEKLSVK	42-50	61	2.80971e+16	3127398821949330	TRUE	NDC80C_F5.zhrm.csv	20180202_Q2_U1_1-2_AB_SA_DOP_20180126_Ndc80-F7-id.14617.14617.3 File:"20180202_Q2_U1_1-2_AB_SA_DOP_20180126_Ndc80-F7-id.raw", NativeID:"controllerType=0 controllerNumber=1 scan=14617"
Ndc80	58	Inter	Ndc80_K_577:Spc25_{_-1	Ndc80_577-584:Spc25_0-11	Ndc80	K	577	Spc25	{	1	KVGNNLQR	577-584	DSIKAFAEK	38-46	62	0	4653320188041080	TRUE	NDC80C_F8.zhrm.csv	20180202_Q2_U1_1-10_AB_SA_DOP_20180126_Ndc80-F4-id.11221.11221.3 File:"20180202_Q2_U1_1-10_AB_SA_DOP_20180126_Ndc80-F4-id.raw", NativeID:"controllerType=0 controllerNumber=1 scan=11221"
Ndc80	59	Inter	Nuf2_K_461:Ndc80_T_384	Nuf2_459-465:Ndc80_383-393	Nuf2	K	461	Ndc80	T	384	MFKMST	459-465	DSIKAFAEK	38-46	153	0	4.46336e+16	TRUE	NDC80C_F5.zhrm.csv	20180202_Q2_U1_1-2_AB_SA_DOP_20180126_Ndc80-F7-id.10399.10399.2 File:"20180202_Q2_U1_1-2_AB_SA_DOP_20180126_Ndc80-F7-id.raw", NativeID:"controllerType=0 controllerNumber=1 scan=10399"
Ndc80	60	Inter	Nuf2_K_456:Spc25_Y_36	Nuf2_452-457:Spc25_20-37	Nuf2	K	456	Spc25	Y	36	TAELKR	452-457	AFAEKLSVK	42-50	111	0	4.58198e+16	TRUE	NDC80C_F5.zhrm.csv	20180202_Q2_U1_1-2_AB_SA_DOP_20180126_Ndc80-F7-id.10475.10475.4 File:"20180202_Q2_U1_1-2_AB_SA_DOP_20180126_Ndc80-F7-id.raw", NativeID:"controllerType=0 controllerNumber=1 scan=10475"
Ndc80	61	Inter	Ndc80_K_629:Spc25_K_52	Ndc80_628-632:Spc25_51-56	Ndc80	K	629	Spc25	K	52	DKYEK	628-632	AFAEKLSVK	42-50	115	0	5.07037e+16	TRUE	NDC80C_F5.zhrm.csv	20180202_Q2_U1_1-2_AB_SA_DOP_20180126_Ndc80-F7-id.10420.10420.3 File:"20180202_Q2_U1_1-2_AB_SA_DOP_20180126_Ndc80-F7-id.raw", NativeID:"controllerType=0 controllerNumber=1 scan=10420"
Ndc80	62	Inter	Nuf2_K_456:Spc25_T_35	Nuf2_452-457:Spc25_34-41	Nuf2	K	456	Spc25	T	35	TAELKR	452-457	LIAEVKGK	85-92	150	0	7.14322e+16	TRUE	NDC80C_F6.zhrm.csv	20180202_Q2_U1_1-10_AB_SA_DOP_20180126_Ndc80-F6-id.13768.13768.2 File:"20180202_Q2_U1_1-10_AB_SA_DOP_20180126_Ndc80-F6-id.raw", NativeID:"controllerType=0 controllerNumber=1 scan=13768"
Ndc80	63	Inter	Nuf2_K_456:Spc25_K_46	Nuf2_452-457:Spc25_42-50	Nuf2	K	456	Spc25	K	46	TAELKR	452-457	KQELEVLTANIQDLK	93-107	128	0	4.50132e+16	TRUE	NDC80C_F5.zhrm.csv	20180202_Q2_U1_1-2_AB_SA_DOP_20180126_Ndc80-F7-id.21297.21297.3 File:"20180202_Q2_U1_1-2_AB_SA_DOP_20180126_Ndc80-F7-id.raw", NativeID:"controllerType=0 controllerNumber=1 scan=21297"
Ndc80	64	Inter	Nuf2_K_456:Spc25_K_41	Nuf2_452-457:Spc25_38-46	Nuf2	K	456	Spc25	K	41	TAELKR	452-457	QELEVLTANIQDLKEEYSR	94-112	105	205761316872428	7.34267e+16	TRUE	NDC80C_F5.zhrm.csv	20180202_Q2_U1_1-2_AB_SA_DOP_20180126_Ndc80-F7-id.24929.24929.4 File:"20180202_Q2_U1_1-2_AB_SA_DOP_20180126_Ndc80-F7-id.raw", NativeID:"controllerType=0 controllerNumber=1 scan=24929"
Ndc80	65	Inter	Nuf2_K_456:Spc25_K_37	Nuf2_452-457:Spc25_34-41	Nuf2	K	456	Spc25	K	37	TAELKR	452-457	DYEVSDSAPHLEGLAEFQENVR	181-202	83	1.48148e+16	6.95323e+16	TRUE	NDC80C_F5.zhrm.csv	20180202_Q2_U1_1-2_AB_SA_DOP_20180126_Ndc80-F7-id.20118.20118.4 File:"20180202_Q2_U1_1-2_AB_SA_DOP_20180126_Ndc80-F7-id.raw", NativeID:"controllerType=0 controllerNumber=1 scan=20118"
Ndc80	66	Inter	Nuf2_K_456:Spc25_K_21	Nuf2_452-457:Spc25_20-33	Nuf2	K	456	Spc25	K	21	TAELKR	452-457	KTNNFSAFLANVR	203-215	81	205761316872428	7.93013e+16	TRUE	NDC80C_F6.zhrm.csv	20180202_Q2_U1_1-10_AB_SA_DOP_20180126_Ndc80-F6-id.20110.20110.3 File:"20180202_Q2_U1_1-10_AB_SA_DOP_20180126_Ndc80-F6-id.raw", NativeID:"controllerType=0 controllerNumber=1 scan=20110"
Ndc80	67	Inter	Nuf2_K_456:Spc24_K_50	Nuf2_452-457:Spc24_41-53	Nuf2	K	456	Spc24	K	50	TAELKR	452-457	DYEVSDSAPHLEGLAEFQENVR	181-202	103	1.97239e+16	7.48944e+16	TRUE	NDC80C_F5.zhrm.csv	20180202_Q2_U1_1-2_AB_SA_DOP_20180126_Ndc80-F7-id.26139.26139.3 File:"20180202_Q2_U1_1-2_AB_SA_DOP_20180126_Ndc80-F7-id.raw", NativeID:"controllerType=0 controllerNumber=1 scan=26139"
Ndc80	68	Inter	Ndc80_K_606:Spc25_K_21	Ndc80_599-609:Spc25_20-33	Ndc80	K	606	Spc25	K	21	HLEEQIAKVDR	599-609	DYEVSDSAPHLEGLAEFQENVR	181-202	100	0	9.50197e+16	TRUE	NDC80C_F4.zhrm.csv	20180202_Q2_U1_1-10_AB_SA_DOP_20180126_Ndc80-F8-id.22469.22469.5 File:"20180202_Q2_U1_1-10_AB_SA_DOP_20180126_Ndc80-F8-id.raw", NativeID:"controllerType=0 controllerNumber=1 scan=22469"
Ndc80	69	Inter	Ndc80_K_629:Spc25_K_41	Ndc80_628-632:Spc25_38-46	Ndc80	K	629	Spc25	K	41	DKYEK	628-632	KAFTATVYNHHHHHH	216-231	115	0	6.82656e+16	TRUE	NDC80C_F6.zhrm.csv	20180202_Q2_U1_1-10_AB_SA_DOP_20180126_Ndc80-F6-id.13996.13996.4 File:"20180202_Q2_U1_1-10_AB_SA_DOP_20180126_Ndc80-F6-id.raw", NativeID:"controllerType=0 controllerNumber=1 scan=13996"
Ndc80	70	Inter	Nuf2_K_400:Ndc80_Y_564	Nuf2_391-402:Ndc80_563-576	Nuf2	K	400	Ndc80	Y	564	VTTINQEIQKIK	391-402	KAFTATVYNHHHHHH	216-231	116	0	5.80484e+16	TRUE	NDC80C_F6.zhrm.csv	20180202_Q2_U1_1-10_AB_SA_DOP_20180126_Ndc80-F6-id.14500.14500.4 File:"20180202_Q2_U1_1-10_AB_SA_DOP_20180126_Ndc80-F6-id.raw", NativeID:"controllerType=0 controllerNumber=1 scan=14500"
Ndc80	1	Intra	Ndc80_K_271:Ndc80_K_255	Ndc80_265-273:Ndc80_254-264	Ndc80	K	271	Ndc80	K	255	LESLEAKNR	265-273	TAELKR	452-457	141	0	4.96473e+16	TRUE	NDC80C_F7.zhrm.csv	20180202_Q2_U1_1-2_AB_SA_DOP_20180126_Ndc80-F5-id.5289.5289.3 File:"20180202_Q2_U1_1-2_AB_SA_DOP_20180126_Ndc80-F5-id.raw", NativeID:"controllerType=0 controllerNumber=1 scan=5289"
Ndc80	2	Intra	Ndc80_S_66:Ndc80_K_288	Ndc80_61-67:Ndc80_287-297	Ndc80	S	66	Ndc80	K	288	TSGHGSR	61-67	MQQLNAAHQEALMKLER	152-168	65	1.63043e+16	6.05873e+16	TRUE	NDC80C_F6.zhrm.csv	20180202_Q2_U1_1-10_AB_SA_DOP_20180126_Ndc80-F6-id.15063.15063.4 File:"20180202_Q2_U1_1-10_AB_SA_DOP_20180126_Ndc80-F6-id.raw", NativeID:"controllerType=0 controllerNumber=1 scan=15063"
Ndc80	3	Intra	Spc24_K_98:Spc24_K_112	Spc24_97-106:Spc24_107-120	Spc24	K	98	Spc24	K	112	LKASLLQLTR	97-106	MQQLNAAHQEALMKLER	152-168	78	1.40647e+16	5.66805e+16	TRUE	NDC80C_F5.zhrm.csv	20180202_Q2_U1_1-2_AB_SA_DOP_20180126_Ndc80-F7-id.14777.14777.6 File:"20180202_Q2_U1_1-2_AB_SA_DOP_20180126_Ndc80-F7-id.raw", NativeID:"controllerType=0 controllerNumber=1 scan=14777"
Ndc80	4	Intra	Nuf2_Y_388:Nuf2_K_400	Nuf2_385-390:Nuf2_391-402	Nuf2	Y	388	Nuf2	K	400	GAVYER	385-390	VTTINQEIQKIK	391-402	69	1.32576e+16	7.22755e+16	TRUE	NDC80C_F6.zhrm.csv	20180202_Q2_U1_1-10_AB_SA_DOP_20180126_Ndc80-F6-id.17167.17167.5 File:"20180202_Q2_U1_1-10_AB_SA_DOP_20180126_Ndc80-F6-id.raw", NativeID:"controllerType=0 controllerNumber=1 scan=17167"
Ndc80	5	Intra	Nuf2_Y_388:Nuf2_K_342	Nuf2_385-390:Nuf2_336-343	Nuf2	Y	388	Nuf2	K	342	GAVYER	385-390	VTTINQEIQKIK	391-402	109	0	5.63557e+16	TRUE	NDC80C_F6.zhrm.csv	20180202_Q2_U1_1-10_AB_SA_DOP_20180126_Ndc80-F6-id.16995.16995.3 File:"20180202_Q2_U1_1-10_AB_SA_DOP_20180126_Ndc80-F6-id.raw", NativeID:"controllerType=0 controllerNumber=1 scan=16995"
Ndc80	6	Intra	Nuf2_T_452:Nuf2_K_461	Nuf2_452-457:Nuf2_459-465	Nuf2	T	452	Nuf2	K	461	TAELKR	452-457	TEENSFKR	336-343	110	0	5.7872e+16	TRUE	NDC80C_F6.zhrm.csv	20180202_Q2_U1_1-10_AB_SA_DOP_20180126_Ndc80-F6-id.8993.8993.3 File:"20180202_Q2_U1_1-10_AB_SA_DOP_20180126_Ndc80-F6-id.raw", NativeID:"controllerType=0 controllerNumber=1 scan=8993"
Ndc80	7	Intra	Nuf2_T_261:Nuf2_K_383	Nuf2_260-264:Nuf2_380-384	Nuf2	T	261	Nuf2	K	383	DTVQK	260-264	LGIQQLKDAAER	403-414	135	0	6.30204e+16	TRUE	NDC80C_F6.zhrm.csv	20180202_Q2_U1_1-10_AB_SA_DOP_20180126_Ndc80-F6-id.17802.17802.3 File:"20180202_Q2_U1_1-10_AB_SA_DOP_20180126_Ndc80-F6-id.raw", NativeID:"controllerType=0 controllerNumber=1 scan=17802"
Ndc80	8	Intra	Nuf2_K_456:Nuf2_Y_445	Nuf2_452-457:Nuf2_440-447	Nuf2	K	456	Nuf2	Y	445	TAELKR	452-457	DAAEREKLK	410-418	64	2.45098e+16	6.71132e+16	TRUE	NDC80C_F7.zhrm.csv	20180202_Q2_U1_1-2_AB_SA_DOP_20180126_Ndc80-F5-id.9086.9086.3 File:"20180202_Q2_U1_1-2_AB_SA_DOP_20180126_Ndc80-F5-id.raw", NativeID:"controllerType=0 controllerNumber=1 scan=9086"
Ndc80	9	Intra	Nuf2_K_456:Nuf2_T_464	Nuf2_452-457:Nuf2_459-465	Nuf2	K	456	Nuf2	T	464	TAELKR	452-457	SQEIFLNLKTALEK	419-432	124	0	5.69003e+16	TRUE	NDC80C_F6.zhrm.csv	20180202_Q2_U1_1-10_AB_SA_DOP_20180126_Ndc80-F6-id.23106.23106.3 File:"20180202_Q2_U1_1-10_AB_SA_DOP_20180126_Ndc80-F6-id.raw", NativeID:"controllerType=0 controllerNumber=1 scan=23106"
Ndc80	10	Intra	Nuf2_K_456:Nuf2_S_444	Nuf2_452-457:Nuf2_440-447	Nuf2	K	456	Nuf2	S	444	TAELKR	452-457	SQEIFLNLKTALEK	419-432	52	3.94737e+16	6.75575e+16	TRUE	NDC80C_F7.zhrm.csv	20180202_Q2_U1_1-2_AB_SA_DOP_20180126_Ndc80-F5-id.22094.22094.4 File:"20180202_Q2_U1_1-2_AB_SA_DOP_20180126_Ndc80-F5-id.raw", NativeID:"controllerType=0 controllerNumber=1 scan=22094"
Ndc80	11	Intra	Nuf2_K_456:Nuf2_K_461	Nuf2_452-457:Nuf2_459-465	Nuf2	K	456	Nuf2	K	461	TAELKR	452-457	LLETQDGAEKQLR	41-53	52	4.53431e+16	5.8766e+16	TRUE	NDC80C_F5.zhrm.csv	20180202_Q2_U1_1-2_AB_SA_DOP_20180126_Ndc80-F7-id.12249.12249.4 File:"20180202_Q2_U1_1-2_AB_SA_DOP_20180126_Ndc80-F7-id.raw", NativeID:"controllerType=0 controllerNumber=1 scan=12249"
Ndc80	12	Intra	Nuf2_K_456:Nuf2_K_447	Nuf2_452-457:Nuf2_440-451	Nuf2	K	456	Nuf2	K	447	TAELKR	452-457	LKASLLQLTR	97-106	84	0	6.00636e+16	TRUE	NDC80C_F6.zhrm.csv	20180202_Q2_U1_1-10_AB_SA_DOP_20180126_Ndc80-F6-id.17224.17224.4 File:"20180202_Q2_U1_1-10_AB_SA_DOP_20180126_Ndc80-F6-id.raw", NativeID:"controllerType=0 controllerNumber=1 scan=17224"
Ndc80	13	Intra	Nuf2_K_418:Nuf2_K_432	Nuf2_417-427:Nuf2_428-439	Nuf2	K	418	Nuf2	K	432	LKSQEIFLNLK	417-427	LLETQDGAEKQLR	41-53	149	0	6.79705e+16	TRUE	NDC80C_F4.zhrm.csv	20180202_Q2_U1_1-10_AB_SA_DOP_20180126_Ndc80-F8-id.12694.12694.2 File:"20180202_Q2_U1_1-10_AB_SA_DOP_20180126_Ndc80-F8-id.raw", NativeID:"controllerType=0 controllerNumber=1 scan=12694"
Ndc80	14	Intra	Nuf2_K_383:Nuf2_Y_388	Nuf2_380-384:Nuf2_385-390	Nuf2	K	383	Nuf2	Y	388	VQEKR	380-384	KTNNFSAFLANVR	203-215	76	3.94477e+16	6.29969e+16	TRUE	NDC80C_F6.zhrm.csv	20180202_Q2_U1_1-10_AB_SA_DOP_20180126_Ndc80-F6-id.18435.18435.3 File:"20180202_Q2_U1_1-10_AB_SA_DOP_20180126_Ndc80-F6-id.raw", NativeID:"controllerType=0 controllerNumber=1 scan=18435"
Ndc80	15	Intra	Nuf2_K_383:Nuf2_T_372	Nuf2_380-384:Nuf2_372-379	Nuf2	K	383	Nuf2	T	372	VQEKR	380-384	KTNNFSAFLANVR	203-215	99	0	5.72818e+16	TRUE	NDC80C_F6.zhrm.csv	20180202_Q2_U1_1-10_AB_SA_DOP_20180126_Ndc80-F6-id.18697.18697.3 File:"20180202_Q2_U1_1-10_AB_SA_DOP_20180126_Ndc80-F6-id.raw", NativeID:"controllerType=0 controllerNumber=1 scan=18697"
Ndc80	16	Intra	Nuf2_K_383:Nuf2_K_400	Nuf2_380-384:Nuf2_391-402	Nuf2	K	383	Nuf2	K	400	VQEKR	380-384	LKEEER	51-56	100	0	3.61255e+16	TRUE	NDC80C_F6.zhrm.csv	20180202_Q2_U1_1-10_AB_SA_DOP_20180126_Ndc80-F6-id.3016.3016.3 File:"20180202_Q2_U1_1-10_AB_SA_DOP_20180126_Ndc80-F6-id.raw", NativeID:"controllerType=0 controllerNumber=1 scan=3016"
Ndc80	17	Intra	Ndc80_T_635:Ndc80_K_629	Ndc80_633-638:Ndc80_625-632	Ndc80	T	635	Ndc80	K	629	KATLIK	633-638	KAFTATVYNHHHHHH	216-231	113	0	4.01103e+16	TRUE	NDC80C_F7.zhrm.csv	20180202_Q2_U1_1-2_AB_SA_DOP_20180126_Ndc80-F5-id.5617.5617.4 File:"20180202_Q2_U1_1-2_AB_SA_DOP_20180126_Ndc80-F5-id.raw", NativeID:"controllerType=0 controllerNumber=1 scan=5617"
Ndc80	18	Intra	Ndc80_T_384:Ndc80_K_393	Ndc80_374-385:Ndc80_386-400	Ndc80	T	384	Ndc80	K	393	NELQQTINKLTK	374-385	KTNNFSAFLANVR	203-215	68	1.30354e+16	5.64299e+16	TRUE	NDC80C_F6.zhrm.csv	20180202_Q2_U1_1-10_AB_SA_DOP_20180126_Ndc80-F6-id.18885.18885.3 File:"20180202_Q2_U1_1-10_AB_SA_DOP_20180126_Ndc80-F6-id.raw", NativeID:"controllerType=0 controllerNumber=1 scan=18885"
Ndc80	19	Intra	Ndc80_T_350:Ndc80_K_360	Ndc80_338-351:Ndc80_352-368	Ndc80	T	350	Ndc80	K	360	VELEBETIKQENTR	338-351	MVEDELALFDK	0-11	133	0	4.50033e+16	TRUE	NDC80C_F5.zhrm.csv	20180202_Q2_U1_1-2_AB_SA_DOP_20180126_Ndc80-F7-id.23923.23923.2 File:"20180202_Q2_U1_1-2_AB_SA_DOP_20180126_Ndc80-F7-id.raw", NativeID:"controllerType=0 controllerNumber=1 scan=23923"
Ndc80	20	Intra	Ndc80_S_66:Ndc80_K_59	Ndc80_61-67:Ndc80_54-60	Ndc80	S	66	Ndc80	K	59	TSGHGSR	61-67	KAFTATVYNHHHHHH	216-231	76	3.94477e+16	5.81948e+16	TRUE	NDC80C_F6.zhrm.csv	20180202_Q2_U1_1-10_AB_SA_DOP_20180126_Ndc80-F6-id.6156.6156.5 File:"20180202_Q2_U1_1-10_AB_SA_DOP_20180126_Ndc80-F6-id.raw", NativeID:"controllerType=0 controllerNumber=1 scan=6156"
Ndc80	21	Intra	Spc24_K_98:Spc24_K_50	Spc24_97-106:Spc24_41-53	Spc24	K	98	Spc24	K	50	LKASLLQLTR	97-106	FKSTDTSBQMAGLR	20-33	109	0	4.67648e+16	TRUE	NDC80C_F5.zhrm.csv	20180202_Q2_U1_1-2_AB_SA_DOP_20180126_Ndc80-F7-id.12959.12959.4 File:"20180202_Q2_U1_1-2_AB_SA_DOP_20180126_Ndc80-F7-id.raw", NativeID:"controllerType=0 controllerNumber=1 scan=12959"
Ndc80	22	Intra	Spc24_T_57:Spc24_K_50	Spc24_54-60:Spc24_41-53	Spc24	T	57	Spc24	K	50	EILTMEK	54-60	DSIKAFAEK	38-46	155	0	5.67225e+16	TRUE	NDC80C_F5.zhrm.csv	20180202_Q2_U1_1-2_AB_SA_DOP_20180126_Ndc80-F7-id.11383.11383.2 File:"20180202_Q2_U1_1-2_AB_SA_DOP_20180126_Ndc80-F7-id.raw", NativeID:"controllerType=0 controllerNumber=1 scan=11383"
Ndc80	23	Intra	Spc25_K_114:Spc25_K_107	Spc25_114-122:Spc25_94-112	Spc25	K	114	Spc25	K	107	KETISTANK	114-122	LKEEER	51-56	139	0	5.60967e+16	TRUE	NDC80C_F6.zhrm.csv	20180202_Q2_U1_1-10_AB_SA_DOP_20180126_Ndc80-F6-id.6088.6088.3 File:"20180202_Q2_U1_1-10_AB_SA_DOP_20180126_Ndc80-F6-id.raw", NativeID:"controllerType=0 controllerNumber=1 scan=6088"
Ndc80	24	Intra	Spc25_K_37:Spc25_S_48	Spc25_34-41:Spc25_42-50	Spc25	K	37	Spc25	S	48	DTYKDSIK	34-41	LKEEER	51-56	139	0	5.89781e+16	TRUE	NDC80C_F6.zhrm.csv	20180202_Q2_U1_1-10_AB_SA_DOP_20180126_Ndc80-F6-id.8936.8936.3 File:"20180202_Q2_U1_1-10_AB_SA_DOP_20180126_Ndc80-F6-id.raw", NativeID:"controllerType=0 controllerNumber=1 scan=8936"
Ndc80	25	Intra	Spc25_T_204:Spc25_K_216	Spc25_204-215:Spc25_216-231	Spc25	T	204	Spc25	K	216	TNNFSAFLANVR	204-215	QNKLIQEK	71-78	78	1.40647e+16	5.14421e+16	TRUE	NDC80C_F5.zhrm.csv	20180202_Q2_U1_1-2_AB_SA_DOP_20180126_Ndc80-F7-id.12280.12280.3 File:"20180202_Q2_U1_1-2_AB_SA_DOP_20180126_Ndc80-F7-id.raw", NativeID:"controllerType=0 controllerNumber=1 scan=12280"
Ndc80	26	Intra	Spc25_S_39:Spc25_K_46	Spc25_34-41:Spc25_42-50	Spc25	S	39	Spc25	K	46	DTYKDSIK	34-41	VELEBETIKQENTR	338-351	121	0	5.13478e+16	TRUE	NDC80C_F5.zhrm.csv	20180202_Q2_U1_1-2_AB_SA_DOP_20180126_Ndc80-F7-id.12160.12160.4 File:"20180202_Q2_U1_1-2_AB_SA_DOP_20180126_Ndc80-F7-id.raw", NativeID:"controllerType=0 controllerNumber=1 scan=12160"
Ndc80	27	Intra	Spc25_S_208:Spc25_K_216	Spc25_203-215:Spc25_216-231	Spc25	S	208	Spc25	K	216	KTNNFSAFLANVR	203-215	LQNIIDNQKYSVADIER	352-368	49	2.85088e+16	5.9687e+16	TRUE	NDC80C_F4.zhrm.csv	20180202_Q2_U1_1-10_AB_SA_DOP_20180126_Ndc80-F8-id.14197.14197.4 File:"20180202_Q2_U1_1-10_AB_SA_DOP_20180126_Ndc80-F8-id.raw", NativeID:"controllerType=0 controllerNumber=1 scan=14197"
Ndc80	28	Intra	Spc25_K_90:Spc25_K_93	Spc25_85-92:Spc25_93-107	Spc25	K	90	Spc25	K	93	LIAEVKGK	85-92	LQNIIDNQKYSVADIER	352-368	119	0	4.8314e+16	TRUE	NDC80C_F5.zhrm.csv	20180202_Q2_U1_1-2_AB_SA_DOP_20180126_Ndc80-F7-id.16703.16703.3 File:"20180202_Q2_U1_1-2_AB_SA_DOP_20180126_Ndc80-F7-id.raw", NativeID:"controllerType=0 controllerNumber=1 scan=16703"
Ndc80	29	Intra	Spc25_K_79:Spc25_K_90	Spc25_79-84:Spc25_85-92	Spc25	K	79	Spc25	K	90	KDNLLK	79-84	LQNIIDNQKYSVADIER	352-368	85	0	6.30194e+16	TRUE	NDC80C_F4.zhrm.csv	20180202_Q2_U1_1-10_AB_SA_DOP_20180126_Ndc80-F8-id.14179.14179.3 File:"20180202_Q2_U1_1-10_AB_SA_DOP_20180126_Ndc80-F8-id.raw", NativeID:"controllerType=0 controllerNumber=1 scan=14179"
Ndc80	30	Intra	Spc25_K_52:Spc25_S_48	Spc25_51-56:Spc25_42-50	Spc25	K	52	Spc25	S	48	LKEEER	51-56	NELQQTINKLTK	374-385	92	1.64204e+16	4.74965e+16	TRUE	NDC80C_F5.zhrm.csv	20180202_Q2_U1_1-2_AB_SA_DOP_20180126_Ndc80-F7-id.15492.15492.3 File:"20180202_Q2_U1_1-2_AB_SA_DOP_20180126_Ndc80-F7-id.raw", NativeID:"controllerType=0 controllerNumber=1 scan=15492"
Ndc80	31	Intra	Spc25_K_52:Spc25_K_46	Spc25_51-56:Spc25_42-50	Spc25	K	52	Spc25	K	46	LKEEER	51-56	AQVYVPLKELLNETEEEINK	455-474	123	0	5.22702e+16	TRUE	NDC80C_F5.zhrm.csv	20180202_Q2_U1_1-2_AB_SA_DOP_20180126_Ndc80-F7-id.28716.28716.3 File:"20180202_Q2_U1_1-2_AB_SA_DOP_20180126_Ndc80-F7-id.raw", NativeID:"controllerType=0 controllerNumber=1 scan=28716"
Ndc80	32	Intra	Spc25_K_52:Spc25_K_41	Spc25_51-56:Spc25_38-46	Spc25	K	52	Spc25	K	41	LKEEER	51-56	AQVYVPLKELLNETEEEINK	455-474	100	0	5.61329e+16	TRUE	NDC80C_F6.zhrm.csv	20180202_Q2_U1_1-10_AB_SA_DOP_20180126_Ndc80-F6-id.29050.29050.4 File:"20180202_Q2_U1_1-10_AB_SA_DOP_20180126_Ndc80-F6-id.raw", NativeID:"controllerType=0 controllerNumber=1 scan=29050"
Ndc80	33	Intra	Spc25_K_216:Spc25_S_187	Spc25_216-231:Spc25_181-202	Spc25	K	216	Spc25	S	187	KAFTATVYNHHHHHH	216-231	TLKEEVQK	502-509	133	0	5.85555e+16	TRUE	NDC80C_F6.zhrm.csv	20180202_Q2_U1_1-10_AB_SA_DOP_20180126_Ndc80-F6-id.13706.13706.3 File:"20180202_Q2_U1_1-10_AB_SA_DOP_20180126_Ndc80-F6-id.raw", NativeID:"controllerType=0 controllerNumber=1 scan=13706"
Ndc80	34	Intra	Spc25_K_148:Spc25_K_203	Spc25_148-153:Spc25_203-215	Spc25	K	148	Spc25	K	203	KIYGEK	148-153	TLKEEVQK	502-509	87	0	5.2257e+16	TRUE	NDC80C_F6.zhrm.csv	20180202_Q2_U1_1-10_AB_SA_DOP_20180126_Ndc80-F6-id.11189.11189.3 File:"20180202_Q2_U1_1-10_AB_SA_DOP_20180126_Ndc80-F6-id.raw", NativeID:"controllerType=0 controllerNumber=1 scan=11189"
Ndc80	35	Intra	Spc25_K_216:Spc25_S_185	Spc25_216-231:Spc25_181-202	Spc25	K	216	Spc25	S	185	KAFTATVYNHHHHHH	216-231	EYQLVVQTTTEERR	563-576	90	1.61031e+16	3.89733e+16	TRUE	NDC80C_F5.zhrm.csv	20180202_Q2_U1_1-2_AB_SA_DOP_20180126_Ndc80-F7-id.17401.17401.4 File:"20180202_Q2_U1_1-2_AB_SA_DOP_20180126_Ndc80-F7-id.raw", NativeID:"controllerType=0 controllerNumber=1 scan=17401"
Ndc80	36	Intra	Spc25_K_203:Spc25_Y_223	Spc25_203-215:Spc25_216-231	Spc25	K	203	Spc25	Y	223	KTNNFSAFLANVR	203-215	EYQLVVQTTTEER	563-575	89	0	8459201540480860	TRUE	NDC80C_F4.zhrm.csv	20180202_Q2_U1_1-10_AB_SA_DOP_20180126_Ndc80-F8-id.16302.16302.2 File:"20180202_Q2_U1_1-10_AB_SA_DOP_20180126_Ndc80-F8-id.raw", NativeID:"controllerType=0 controllerNumber=1 scan=16302"
Ndc80	37	Intra	Spc25_K_203:Spc25_Y_182	Spc25_203-215:Spc25_181-202	Spc25	K	203	Spc25	Y	182	KTNNFSAFLANVR	203-215	EYQLVVQTTTEER	563-575	113	0	8291268854364830	TRUE	NDC80C_F5.zhrm.csv	20180202_Q2_U1_1-2_AB_SA_DOP_20180126_Ndc80-F7-id.19449.19449.2 File:"20180202_Q2_U1_1-2_AB_SA_DOP_20180126_Ndc80-F7-id.raw", NativeID:"controllerType=0 controllerNumber=1 scan=19449"
Ndc80	38	Intra	Spc25_K_203:Spc25_T_221	Spc25_203-215:Spc25_216-231	Spc25	K	203	Spc25	T	221	KTNNFSAFLANVR	203-215	EYQLVVQTTTEER	563-575	109	0	7.53332e+16	TRUE	NDC80C_F6.zhrm.csv	20180202_Q2_U1_1-10_AB_SA_DOP_20180126_Ndc80-F6-id.21377.21377.3 File:"20180202_Q2_U1_1-10_AB_SA_DOP_20180126_Ndc80-F6-id.raw", NativeID:"controllerType=0 controllerNumber=1 scan=21377"
Ndc80	39	Intra	Spc25_K_203:Spc25_T_219	Spc25_203-215:Spc25_216-231	Spc25	K	203	Spc25	T	219	KTNNFSAFLANVR	203-215	IKDPRPLNDK	80-89	38	1.19048e+16	7735460610608940	TRUE	NDC80C_F3.zhrm.csv	20180202_Q2_U1_1-2_AB_SA_DOP_20180126_Ndc80-F9-id.26028.26028.3 File:"20180202_Q2_U1_1-2_AB_SA_DOP_20180126_Ndc80-F9-id.raw", NativeID:"controllerType=0 controllerNumber=1 scan=26028"
Ndc80	40	Intra	Spc25_K_203:Spc25_S_185	Spc25_203-215:Spc25_181-202	Spc25	K	203	Spc25	S	185	KTNNFSAFLANVR	203-215	LTKDLEAEQQK	383-393	56	1.6317e+16	4043185148255060	TRUE	NDC80C_F4.zhrm.csv	20180202_Q2_U1_1-10_AB_SA_DOP_20180126_Ndc80-F8-id.14727.14727.3 File:"20180202_Q2_U1_1-10_AB_SA_DOP_20180126_Ndc80-F8-id.raw", NativeID:"controllerType=0 controllerNumber=1 scan=14727"
Ndc80	41	Intra	Spc25_K_203:Spc25_K_216	Spc25_203-215:Spc25_216-231	Spc25	K	203	Spc25	K	216	KTNNFSAFLANVR	203-215	KVGNNLQR	577-584	85	0	5222699879958600	TRUE	NDC80C_F4.zhrm.csv	20180202_Q2_U1_1-10_AB_SA_DOP_20180126_Ndc80-F8-id.24454.24454.2 File:"20180202_Q2_U1_1-10_AB_SA_DOP_20180126_Ndc80-F8-id.raw", NativeID:"controllerType=0 controllerNumber=1 scan=24454"
Ndc80	42	Intra	Spc25_K_148:Spc25_Y_182	Spc25_148-153:Spc25_181-202	Spc25	K	148	Spc25	Y	182	KIYGEK	148-153	LLETQDGAEKQLR	41-53	65	7246376811594200	0.54188946505663749	TRUE	NDC80C_F4.zhrm.csv	20180202_Q2_U1_1-10_AB_SA_DOP_20180126_Ndc80-F8-id.11184.11184.3 File:"20180202_Q2_U1_1-10_AB_SA_DOP_20180126_Ndc80-F8-id.raw", NativeID:"controllerType=0 controllerNumber=1 scan=11184"
Ndc80	43	Intra	Ndc80_S_66:Ndc80_K_346	Ndc80_61-67:Ndc80_338-351	Ndc80	S	66	Ndc80	K	346	TSGHGSR	61-67	LLETQDGAEKQLR	41-53	49	2.85088e+16	0.8221120290487911	TRUE	NDC80C_F4.zhrm.csv	20180202_Q2_U1_1-10_AB_SA_DOP_20180126_Ndc80-F8-id.12446.12446.3 File:"20180202_Q2_U1_1-10_AB_SA_DOP_20180126_Ndc80-F8-id.raw", NativeID:"controllerType=0 controllerNumber=1 scan=12446"
Ndc80	44	Intra	Spc25_Y_36:Spc25_K_46	Spc25_34-41:Spc25_42-50	Spc25	Y	36	Spc25	K	46	DTYKDSIK	34-41	LKASLLQLTR	97-106	63	1.79211e+16	7.3334e+16	TRUE	NDC80C_F6.zhrm.csv	20180202_Q2_U1_1-10_AB_SA_DOP_20180126_Ndc80-F6-id.18828.18828.3 File:"20180202_Q2_U1_1-10_AB_SA_DOP_20180126_Ndc80-F6-id.raw", NativeID:"controllerType=0 controllerNumber=1 scan=18828"
Ndc80	45	Intra	Ndc80_S_62:Ndc80_K_577	Ndc80_61-67:Ndc80_577-584	Ndc80	S	62	Ndc80	K	577	TSGHGSR	61-67	LLETQDGAEKQLR	41-53	68	1968503937007870	3.88782e+16	TRUE	NDC80C_F5.zhrm.csv	20180202_Q2_U1_1-2_AB_SA_DOP_20180126_Ndc80-F7-id.10410.10410.3 File:"20180202_Q2_U1_1-2_AB_SA_DOP_20180126_Ndc80-F7-id.raw", NativeID:"controllerType=0 controllerNumber=1 scan=10410"
Ndc80	46	Intra	Ndc80_K_400:Ndc80_K_405	Ndc80_394-403:Ndc80_404-417	Ndc80	K	400	Ndc80	K	405	LWNEELKYAR	394-403	LLETQDGAEKQLR	41-53	145	0	5.85022e+16	TRUE	NDC80C_F5.zhrm.csv	20180202_Q2_U1_1-2_AB_SA_DOP_20180126_Ndc80-F7-id.15776.15776.2 File:"20180202_Q2_U1_1-2_AB_SA_DOP_20180126_Ndc80-F7-id.raw", NativeID:"controllerType=0 controllerNumber=1 scan=15776"
Ndc80	47	Intra	Ndc80_K_577:Ndc80_T_350	Ndc80_577-584:Ndc80_338-351	Ndc80	K	577	Ndc80	T	350	KVGNNLQR	577-584	KTNNFSAFLANVR	203-215	52	3.66667e+16	6.70282e+16	TRUE	NDC80C_F6.zhrm.csv	20180202_Q2_U1_1-10_AB_SA_DOP_20180126_Ndc80-F6-id.20653.20653.3 File:"20180202_Q2_U1_1-10_AB_SA_DOP_20180126_Ndc80-F6-id.raw", NativeID:"controllerType=0 controllerNumber=1 scan=20653"
Ndc80	48	Intra	Ndc80_K_577:Ndc80_K_504	Ndc80_577-584:Ndc80_502-509	Ndc80	K	577	Ndc80	K	504	KVGNNLQR	577-584	FKSTDTSBQmAGLR	20-33	52	3.94737e+16	8.92704e+16	TRUE	NDC80C_F7.zhrm.csv	20180202_Q2_U1_1-2_AB_SA_DOP_20180126_Ndc80-F5-id.11813.11813.3 File:"20180202_Q2_U1_1-2_AB_SA_DOP_20180126_Ndc80-F5-id.raw", NativeID:"controllerType=0 controllerNumber=1 scan=11813"
Ndc80	49	Intra	Ndc80_K_577:Ndc80_K_360	Ndc80_577-584:Ndc80_352-368	Ndc80	K	577	Ndc80	K	360	KVGNNLQR	577-584	FKSTDTSBQMAGLR	20-33	130	0	7.14669e+16	TRUE	NDC80C_F7.zhrm.csv	20180202_Q2_U1_1-2_AB_SA_DOP_20180126_Ndc80-F5-id.13931.13931.3 File:"20180202_Q2_U1_1-2_AB_SA_DOP_20180126_Ndc80-F5-id.raw", NativeID:"controllerType=0 controllerNumber=1 scan=13931"
Ndc80	50	Intra	Ndc80_K_606:Ndc80_S_595	Ndc80_599-609:Ndc80_585-598	Ndc80	K	606	Ndc80	S	595	HLEEQIAKVDR	599-609	DTYKDSIK	34-41	59	2.6178e+16	6.79158e+16	TRUE	NDC80C_F6.zhrm.csv	20180202_Q2_U1_1-10_AB_SA_DOP_20180126_Ndc80-F6-id.11205.11205.2 File:"20180202_Q2_U1_1-10_AB_SA_DOP_20180126_Ndc80-F6-id.raw", NativeID:"controllerType=0 controllerNumber=1 scan=11205"
Ndc80	51	Intra	Ndc80_K_504:Ndc80_S_496	Ndc80_502-509:Ndc80_480-498	Ndc80	K	504	Ndc80	S	496	TLKEEVQK	502-509	FKSTDTSBQMAGLRDTYK	20-37	105	205761316872428	5.14818e+16	TRUE	NDC80C_F5.zhrm.csv	20180202_Q2_U1_1-2_AB_SA_DOP_20180126_Ndc80-F7-id.11070.11070.5 File:"20180202_Q2_U1_1-2_AB_SA_DOP_20180126_Ndc80-F7-id.raw", NativeID:"controllerType=0 controllerNumber=1 scan=11070"
Ndc80	52	Intra	Ndc80_K_504:Ndc80_K_497	Ndc80_502-509:Ndc80_480-498	Ndc80	K	504	Ndc80	K	497	TLKEEVQK	502-509	DTYKDSIK	34-41	105	0	4.56178e+16	TRUE	NDC80C_F6.zhrm.csv	20180202_Q2_U1_1-10_AB_SA_DOP_20180126_Ndc80-F6-id.11175.11175.3 File:"20180202_Q2_U1_1-10_AB_SA_DOP_20180126_Ndc80-F6-id.raw", NativeID:"controllerType=0 controllerNumber=1 scan=11175"
Ndc80	53	Intra	Ndc80_K_633:Ndc80_K_629	Ndc80_633-638:Ndc80_628-632	Ndc80	K	633	Ndc80	K	629	KATLIK	633-638	DSIKAFAEK	38-46	101	1.89394e+16	6.1108e+16	TRUE	NDC80C_F5.zhrm.csv	20180202_Q2_U1_1-2_AB_SA_DOP_20180126_Ndc80-F7-id.11403.11403.4 File:"20180202_Q2_U1_1-2_AB_SA_DOP_20180126_Ndc80-F7-id.raw", NativeID:"controllerType=0 controllerNumber=1 scan=11403"
Ndc80	54	Intra	Ndc80_K_478:Ndc80_K_577	Ndc80_475-479:Ndc80_577-584	Ndc80	K	478	Ndc80	K	577	ALNKK	475-479	AFAEKLSVK	42-50	125	0	3.76175e+16	TRUE	NDC80C_F6.zhrm.csv	20180202_Q2_U1_1-10_AB_SA_DOP_20180126_Ndc80-F6-id.14181.14181.3 File:"20180202_Q2_U1_1-10_AB_SA_DOP_20180126_Ndc80-F6-id.raw", NativeID:"controllerType=0 controllerNumber=1 scan=14181"
Ndc80	55	Intra	Ndc80_K_427:Ndc80_K_440	Ndc80_424-433:Ndc80_434-452	Ndc80	K	427	Ndc80	K	440	LIPKGAENSK	424-433	AFAEKLSVK	42-50	149	0	6.2509e+16	TRUE	NDC80C_F6.zhrm.csv	20180202_Q2_U1_1-10_AB_SA_DOP_20180126_Ndc80-F6-id.20845.20845.3 File:"20180202_Q2_U1_1-10_AB_SA_DOP_20180126_Ndc80-F6-id.raw", NativeID:"controllerType=0 controllerNumber=1 scan=20845"
Ndc80	56	Intra	Ndc80_K_423:Ndc80_K_417	Ndc80_422-427:Ndc80_406-420	Ndc80	K	423	Ndc80	K	417	LKLIPK	422-427	AFAEKLSVK	42-50	120	0	3.3134e+16	TRUE	NDC80C_F6.zhrm.csv	20180202_Q2_U1_1-10_AB_SA_DOP_20180126_Ndc80-F6-id.19223.19223.3 File:"20180202_Q2_U1_1-10_AB_SA_DOP_20180126_Ndc80-F6-id.raw", NativeID:"controllerType=0 controllerNumber=1 scan=19223"
Ndc80	57	Intra	Ndc80_K_400:Ndc80_Y_415	Ndc80_394-403:Ndc80_404-417	Ndc80	K	400	Ndc80	Y	415	LWNEELKYAR	394-403	LKEEER	51-56	148	0	4.58231e+16	TRUE	NDC80C_F6.zhrm.csv	20180202_Q2_U1_1-10_AB_SA_DOP_20180126_Ndc80-F6-id.14229.14229.2 File:"20180202_Q2_U1_1-10_AB_SA_DOP_20180126_Ndc80-F6-id.raw", NativeID:"controllerType=0 controllerNumber=1 scan=14229"
Ndc80	58	Intra	Ndc80_S_295:Ndc80_K_288	Ndc80_293-297:Ndc80_287-292	Ndc80	S	295	Ndc80	K	288	LESLR	293-297	LSmQELRSQDVNK	14-26	59	1.17371e+16	4.20443e+16	TRUE	NDC80C_F4.zhrm.csv	20180202_Q2_U1_1-10_AB_SA_DOP_20180126_Ndc80-F8-id.15017.15017.3 File:"20180202_Q2_U1_1-10_AB_SA_DOP_20180126_Ndc80-F8-id.raw", NativeID:"controllerType=0 controllerNumber=1 scan=15017"
Ndc80	59	Intra	Ndc80_K_427:Ndc80_K_452	Ndc80_424-433:Ndc80_441-454	Ndc80	K	427	Ndc80	K	452	LIPKGAENSK	424-433	VELEBETIKQENTR	338-351	93	0	6.06351e+16	TRUE	NDC80C_F4.zhrm.csv	20180202_Q2_U1_1-10_AB_SA_DOP_20180126_Ndc80-F8-id.12321.12321.4 File:"20180202_Q2_U1_1-10_AB_SA_DOP_20180126_Ndc80-F8-id.raw", NativeID:"controllerType=0 controllerNumber=1 scan=12321"
Ndc80	60	Intra	Ndc80_K_382:Ndc80_K_393	Ndc80_374-385:Ndc80_386-400	Ndc80	K	382	Ndc80	K	393	NELQQTINKLTK	374-385	EYEEBMSEDLSENIKEIR	610-627	134	0	5.42483e+16	TRUE	NDC80C_F5.zhrm.csv	20180202_Q2_U1_1-2_AB_SA_DOP_20180126_Ndc80-F7-id.21030.21030.3 File:"20180202_Q2_U1_1-2_AB_SA_DOP_20180126_Ndc80-F7-id.raw", NativeID:"controllerType=0 controllerNumber=1 scan=21030"
Ndc80	61	Intra	Ndc80_K_360:Ndc80_K_360	Ndc80_352-368:Ndc80_352-368	Ndc80	K	360	Ndc80	K	360	LQNIIDNQKYSVADIER	352-368	EKEPNRLESLR	287-297	64	2.59403e+16	6.71188e+16	TRUE	NDC80C_F5.zhrm.csv	20180202_Q2_U1_1-2_AB_SA_DOP_20180126_Ndc80-F7-id.16277.16277.4 File:"20180202_Q2_U1_1-2_AB_SA_DOP_20180126_Ndc80-F7-id.raw", NativeID:"controllerType=0 controllerNumber=1 scan=16277"
Ndc80	62	Intra	Ndc80_K_346:Ndc80_K_360	Ndc80_338-351:Ndc80_352-368	Ndc80	K	346	Ndc80	K	360	VELEBETIKQENTR	338-351	VELEBETIKQENTR	338-351	82	0	5.31275e+16	TRUE	NDC80C_F4.zhrm.csv	20180202_Q2_U1_1-10_AB_SA_DOP_20180126_Ndc80-F8-id.16091.16091.4 File:"20180202_Q2_U1_1-10_AB_SA_DOP_20180126_Ndc80-F8-id.raw", NativeID:"controllerType=0 controllerNumber=1 scan=16091"
Ndc80	63	Intra	Ndc80_K_385:Ndc80_T_350	Ndc80_383-393:Ndc80_338-351	Ndc80	K	385	Ndc80	T	350	LTKDLEAEQQK	383-393	KAFTATVYNHHHHHH	216-231	93	0	6.42615e+16	TRUE	NDC80C_F6.zhrm.csv	20180202_Q2_U1_1-10_AB_SA_DOP_20180126_Ndc80-F6-id.18860.18860.5 File:"20180202_Q2_U1_1-10_AB_SA_DOP_20180126_Ndc80-F6-id.raw", NativeID:"controllerType=0 controllerNumber=1 scan=18860"
Ndc80	64	Intra	Ndc80_K_385:Ndc80_K_385	Ndc80_383-393:Ndc80_383-393	Ndc80	K	385	Ndc80	K	385	LTKDLEAEQQK	383-393	LLEMVATHVGSVEKHLEEQIAK	585-606	81	0	3.75955e+16	TRUE	NDC80C_F4.zhrm.csv	20180202_Q2_U1_1-10_AB_SA_DOP_20180126_Ndc80-F8-id.18619.18619.5 File:"20180202_Q2_U1_1-10_AB_SA_DOP_20180126_Ndc80-F8-id.raw", NativeID:"controllerType=0 controllerNumber=1 scan=18619"
Ndc80	65	Intra	Ndc80_S_432:Ndc80_K_452	Ndc80_424-433:Ndc80_441-454	Ndc80	S	432	Ndc80	K	452	LIPKGAENSK	424-433	LLEMVATHVGSVEKHLEEQIAK	585-606	105	205761316872428	4.10143e+16	TRUE	NDC80C_F5.zhrm.csv	20180202_Q2_U1_1-2_AB_SA_DOP_20180126_Ndc80-F7-id.21952.21952.5 File:"20180202_Q2_U1_1-2_AB_SA_DOP_20180126_Ndc80-F7-id.raw", NativeID:"controllerType=0 controllerNumber=1 scan=21952"
Ndc80	66	Intra	Ndc80_K_346:Ndc80_S_362	Ndc80_338-351:Ndc80_352-368	Ndc80	K	346	Ndc80	S	362	VELEBETIKQENTR	338-351	LLEmVATHVGSVEKHLEEQIAK	585-606	66	1.4652e+16	6.79519e+16	TRUE	NDC80C_F6.zhrm.csv	20180202_Q2_U1_1-10_AB_SA_DOP_20180126_Ndc80-F6-id.22281.22281.4 File:"20180202_Q2_U1_1-10_AB_SA_DOP_20180126_Ndc80-F6-id.raw", NativeID:"controllerType=0 controllerNumber=1 scan=22281"
Ndc80	67	Intra	Spc25_K_203:Spc25_T_221	Spc25_203-215:Spc25_216-231	Spc25	K	203	Spc25	T	221	KTNNFSAFLANVR	203-215	KAFTATVYNHHHHHH	216-231	114	0	5.61537e+16	TRUE	NDC80C_F7.zhrm.csv	20180202_Q2_U1_1-2_AB_SA_DOP_20180126_Ndc80-F5-id.14605.14605.4 File:"20180202_Q2_U1_1-2_AB_SA_DOP_20180126_Ndc80-F5-id.raw", NativeID:"controllerType=0 controllerNumber=1 scan=14605"
Ndc80	68	Intra	Spc25_K_203:Spc25_Y_223	Spc25_203-215:Spc25_216-231	Spc25	K	203	Spc25	Y	223	KTNNFSAFLANVR	203-215	KAFTATVYNHHHHHH	216-231	113	0	5.88577e+16	TRUE	NDC80C_F7.zhrm.csv	20180202_Q2_U1_1-2_AB_SA_DOP_20180126_Ndc80-F5-id.14615.14615.5 File:"20180202_Q2_U1_1-2_AB_SA_DOP_20180126_Ndc80-F5-id.raw", NativeID:"controllerType=0 controllerNumber=1 scan=14615"
Ndc80	69	Intra	Spc25_T_204:Spc25_K_216	Spc25_204-215:Spc25_216-231	Spc25	T	204	Spc25	K	216	TNNFSAFLANVR	204-215	KAFTATVYNHHHHHH	216-231	89	0	4.61334e+16	TRUE	NDC80C_F6.zhrm.csv	20180202_Q2_U1_1-10_AB_SA_DOP_20180126_Ndc80-F6-id.16594.16594.4 File:"20180202_Q2_U1_1-10_AB_SA_DOP_20180126_Ndc80-F6-id.raw", NativeID:"controllerType=0 controllerNumber=1 scan=16594"
Ndc80	70	Intra	Spc25_S_208:Spc25_K_216	Spc25_203-215:Spc25_216-231	Spc25	S	208	Spc25	K	216	KTNNFSAFLANVR	203-215	KAFTATVYNHHHHHH	216-231	94	0	6.52645e+16	TRUE	NDC80C_F6.zhrm.csv	20180202_Q2_U1_1-10_AB_SA_DOP_20180126_Ndc80-F6-id.14336.14336.3 File:"20180202_Q2_U1_1-10_AB_SA_DOP_20180126_Ndc80-F6-id.raw", NativeID:"controllerType=0 controllerNumber=1 scan=14336"
Ndc80	71	Intra	Spc25_K_216:Spc25_S_185	Spc25_216-231:Spc25_181-202	Spc25	K	216	Spc25	S	185	KAFTATVYNHHHHHH	216-231	DYEVSDSAPHLEGLAEFQENVR	181-202	99	0	6673327878923440	TRUE	NDC80C_F6.zhrm.csv	20180202_Q2_U1_1-10_AB_SA_DOP_20180126_Ndc80-F6-id.16814.16814.5 File:"20180202_Q2_U1_1-10_AB_SA_DOP_20180126_Ndc80-F6-id.raw", NativeID:"controllerType=0 controllerNumber=1 scan=16814"
Ndc80	72	Intra	Spc25_K_216:Spc25_S_187	Spc25_216-231:Spc25_181-202	Spc25	K	216	Spc25	S	187	KAFTATVYNHHHHHH	216-231	DYEVSDSAPHLEGLAEFQENVR	181-202	105	0	6.68265e+16	TRUE	NDC80C_F6.zhrm.csv	20180202_Q2_U1_1-10_AB_SA_DOP_20180126_Ndc80-F6-id.16975.16975.5 File:"20180202_Q2_U1_1-10_AB_SA_DOP_20180126_Ndc80-F6-id.raw", NativeID:"controllerType=0 controllerNumber=1 scan=16975"

## Sheet: Supplementary File 1e
				untreated Ndc80		Aurora B phosphorylated Ndc80
Protein	Position	Residue	Aurora B consensus [R/K x S/T]	Localization prob	Score	Localization prob	Score
NDC80	4	S	yes			0.968882	82.482
NDC80	5	S	yes			0.992715	80.683
NDC80	7	S				0.950949	82.482
NDC80	8	S				0.706151	82.482
NDC80	15	S	yes			1	80.683
NDC80	31	T				0.998569	103.08
NDC80	44	S	yes			0.999997	216.71
NDC80	55	S	yes			1	128.86
NDC80	61	T				0.526866	79.426
NDC80	62	S	yes			0.849727	119.22
NDC80	66	S				0.586904	83.881
NDC80	69	S	yes			1	184.76
NDC80	76	S		0.83386	154.65
NDC80	201	S	yes	0.557391	218.25	0.5	152.34
NDC80	202	S		0.5	218.25	0.677342	152.34
NDC80	485	T		0.998042	53.779
NUF2	171	S		1	230.99	1	228.01
SPC24	100	S	yes	0.999993	61.958
SPC25	64	Y		0.999443	43.813
SPC25	168	S		0.999942	99.86	1	176.04

## Sheet: Supplementary File 1f
			untreated Ndc80						Aurora B phosphorylated Ndc80
Protein	Position	Aurora B consensus site [R/K x S/T]	Localization prob	PEP	Score	Intensity ___1	Intensity ___2	Intensity ___3	Localization prob	PEP	Score	Intensity ___1	Intensity ___2	Intensity ___3	Number of Phospho (STY)	Peptide and phospho (STY) Probabilities
NDC80	4	yes							0.968882	4.5997e-06	82.482			101230000	3	RS(0.969)S(0.08)VS(0.947)S(0.69)GGAGRLS(0.315)MQELR
NDC80	5	yes							0.992715	5.33918e-06	80.683		118320000	302980000	2;3	RS(0.007)S(0.993)VS(0.299)S(0.258)GGAGRLS(0.444)MQELR
NDC80	7								0.950949	4.5997e-06	82.482		543700000	302980000	2;3	RS(0.175)S(0.826)VS(0.951)S(0.418)GGAGRLS(0.63)MQELR
NDC80	8								0.706151	4.5997e-06	82.482		543700000	101230000	2;3	RS(0.019)S(0.123)VS(0.705)S(0.706)GGAGRLS(0.447)MQELR
NDC80	15	yes							1	5.33918e-06	80.683	97689000	118320000	302980000	1;2;3	LS(1)MQELR
NDC80	31								0.998569	0.000124886	103.08	424940000			1	QGLYT(0.999)PQT(0.001)K
NDC80	44	yes							0.999997	1.54588e-32	216.71	37675000			1	PTFGKLS(1)INKPTSER
NDC80	55	yes							1	3.60851e-07	128.86	8459800000			1	KVS(1)LFGKR
NDC80	61								0.526866	1.12973e-06	79.426		16148000		2	T(0.527)S(0.555)GHGS(0.473)RNS(0.443)QLGIFS(0.001)S(0.001)SEK
NDC80	62	yes							0.849727	2.21679e-11	119.22		13546000000		2	RT(0.15)S(0.85)GHGS(0.109)RNS(0.891)QLGIFSSSEK
NDC80	66								0.586904	5.23646e-07	83.881		23548000		2	T(0.161)S(0.839)GHGS(0.587)RNS(0.413)QLGIFSSSEK
NDC80	69	yes							1	2.84091e-15	184.76	241040000	13546000000		1;2	NS(1)QLGIFSSSEK
NDC80	76		0.83386	4.3104e-10	154.65	12181000									1	NSQLGIFS(0.024)S(0.834)S(0.142)EK
NDC80	201	yes	0.557391	1.00671e-52	218.25	7648200			0.5	3.51971e-25	152.34	5707200			1	ES(0.557)S(0.443)PLFDDGQPWGEETEDGIMHNK
NDC80	202		0.5	1.00671e-52	218.25	7648200			0.677342	3.51971e-25	152.34	5707200			1	ES(0.323)S(0.677)PLFDDGQPWGEETEDGIMHNK
NDC80	485		0.998042	0.00376339	53.779	3330900									1	MGLEDT(0.999)LEQLNAMIT(0.001)ESK
NUF2	171		1	1.13324e-34	230.99	338540000			1	3.40941e-34	228.01	364070000	0	0	1	LERLDS(1)VPVEEQEEFK
SPC24	100	yes	0.999993	0.00124825	61.958	12345000									1	AS(1)LLQLTR
SPC25	64		0.999443	0.0174171	43.813	1635400										MVEMFLEY(0.999)QNQIS(0.001)R
SPC25	168		0.999942	1.50334e-06	99.86	5539300			1	2.16042e-19	176.04	5668800			1	NPES(1)PFMFSLHLNEAR

## Sheet: Supplementary File 1g
condition	force (pN)	duration (s)	rescue (y/n/superstall)
Ndc80-FL, no Ska	1.93189	0.3	n
	3.04677	0.031	n
	5.3018	2	n
	1.68353	0.1	n
	4.60204	0.36	n
	4.16184	0.041	n
	2.52191	0.36	n
	3.03785	0.4	n
	3.45482	1.1	n
	2.11516	0.2	n
	1.74243	1.3	n
	0.72856	0.2	n
	1.63827	0.8	n
	2.82948	5	n
	1.68921	0.3	n
	0.75096	2	n
	1.84285	0.15	n
	1.47188	0.45	n
	2.77982	0.4	n
	1.8878	1.2	n
	3.11883	0.2	n
	2.13669	0.7	n
	4.69253	0.35	n
	3.10234	0.15	n
	5.31257	0.15	n
	5.31265	1.7	n
	3.89448	0.2	n
	2.3419	0.1	n
	3.46037	0.3	n
	3.491	0.15	n
	4.40833	0.4	n
	3.90388	0.4	n
	1.26077	0.3	n
	1.19483	0.6	n
	2.45363	0.15	n
	2.84813	1.2	n
	1.59192	1	y
	5.71838	2.5	y
	1.56756	1.5	y
	4.67706	3	y
	5.35518	3	y
	4.98282	2	y
	5.38656	4	y
	4.57743	2	y
	1.89923	2	y
	1.46979	1.5	y
	2.04568	3	y
	5.20002	5	y
	5.18308	2.5	y
	4.79733	3	y
	4.96295	1.5	y
	4.93374	3	y
	5.25514	2	y
	4.00041	4	y
	2.28046	20	y
	4.58704	5	y
	4.1	2	y
Ndc80-P, no Ska	1.84214	0.14	n
	1.53676	0.21	n
	1.08961	0.45	n
	2.73147	0.047	n
	0.98319	0.0025	n
	1.27486	0.02	n
	4.36221	0.08	n
	0.91893	0.2	n
	0.33018	2.1	n
	0.97187	0.12	n
	2.66274	0.34	n
	0.5129	1.5	n
	4.45036	0.1	n
	1.47087	0.3	n
	1.02572	0.164	n
	0.23867	0.5	n
	2.9712	0.53	n
	2.36184	0.06	n
	3.41283	0.042	n
	0.3634	4.5	n
	1.79719	2.5	n
	6.35148	0.96	n
	2.67233	0.12	n
	0.89873	0.12	n
	1.93839	0.1	n
	1.33575	2	n
	1.85926	0.002	n
	2.11108	1.4	y
	6.584	2	y
Ndc80-d80, no Ska	1.3923	0.036	n
	2.06532	0.01	n
	1.41941	0.3	n
	1.03857	0.4	n
	0.99119	1.2	n
	1.09514	0.6	n
	1.0341	0.019	n
	0.95017	0.52	n
	4.72622	0.28	n
	1.34172	0.009	n
	0.50794	0.1	n
	0.60371	0.5	n
	3.09367	0.41	n
	1.7727	0.003	n
	1.27066	0.016	n
	0.82559	1	n
	1.1648	0.25	n
	1.23504	0.18	n
	0.85838	0.19	n
	1.36099	0.185	n
	0.79388	0.12	n
	2.34294	0.16	n
	0.79814	0.03	n
	2.48304	0.49	n
Ndc80-FL, 10nM P-Ska	1.84196	120	n
	5.61394	2.2	n
	4.36033	0.41	n
	3.23856	0.102	n
	5.66057	1.64	n
	2.68801	1.35	n
	5.42784	0.39	n
	5.97325	4	n
	6.85703	3.64	n
	3.62382	6	y
	3.93007	7.2	y
	5.19319	11	y
	6.26739	20	y
	5.09789	29	y
	5.68687	90	y
	4.28569	1.6	y
	3.62167	1.3	y
Ndc80-FL, 10nM NP-Ska	3.22737	0.68	n
	3.46087	0.07	n
	5.34526	0.96	n
	4.07687	0.59	n
	7.0523	0.45	n
	1.26296	0.7	n
	1.44212	0.35	n
	1.76524	1.3	n
	2.27864	46	y
	2.88116	15	y
	3.90861	6	y
	0.67605	2	y
	1.67527	7	y
	2.60677	1.05	y
	1.96291	1.6	y
Ndc80-P, 10nM P-Ska	2.79077	2.6	n
	2.48368	0.74	n
	1.04236	0.7	n
	1.80526	0.45	n
	3.07622	0.23	n
	3.54008	0.05	n
	5.26059	0.56	n
	3.66704	0.175	n
	1.38521	0.6	n
	1.58792	0.09	n
	1.93955	0.43	n
	1.41686	0.009	n
	3.43163	4	y
	3.89734	0.45	y
	1.09294	0.48	y
Ndc80-P, 10nM NP-Ska	2.02787	2.1	n
	3.37645	0.18	n
	2.98479	0.13	n
	3.75981	0.478	n
	2.29319	20	y
	4.14147	60	y
	3.77606	30	y
	3.56447	7	y
	7.28937	5	y
Ndc80-d80, 10nM P-Ska	1.57744	0.18	n
	1.51158	0.24	n
	3.61799	0.33	n
	2.29923	0.45	n
	3.72248	0.09	n
	2.1674	1.23	n
	2.85408	0.52	n
	3.91778	21.9	n
	3.55651	0.78	n
	3.84659	2.25	n
	3.21513	0.22	n
	1.45854	3.8	y
	2.03587	18	y
	3.67406	120	y
	2.50655	70	y
	2.72689	120	y
Ndc80-d80, 10nM NP-Ska	2.20668	0.8	n
	3.32479	0.26	n
	1.17857	0.22	n
	2.96553	0.024	n
	1.39279	1	n
	1.42933	1.6	n
	2.42602	0.18	n
	2.86461	0.17	n
	1.89608	0.4	n
	1.09392	0.24	n
	0.70162	0.28	n
	2.69659	0.057	n
	1.23949	0.006	n
	0.80274	0.11	n
	1.18027	1.5	n
	1.12105	0.098	n
	0.94376	0.28	n
	2.81197	0.6	y
	1.77484	0.92	y
	2.36912	2	y
	2.38403	120	y
Ndc80-FL, 100nM P-Ska	4.35328	0.9	n
	1.87051	1.06	n
	1.22765	0.1	n
	3.90543	0.72	n
	2.40671	6	n
	4.14648	0.97	n
	1.05586	0.55	n
	8.13363	1.9	n
	1.70599	13	y
	2.91658	14	y
	2.80648	0.7	y
	1.73668	2.5	y
	4.30939	33	y
	4.11795	17	y
	1.33837	0.22	y
	6.8787	30	y
	7.22684	70	superstall
	5.93998	15	superstall
	3.53646	40	superstall
Ndc80-FL, 100nM NP-Ska	4.09742	0.067	n
	2.83585	1.03	n
	4.99807	0.25	n
	6.42588	4.8	n
	9.8751	1.1	n
	7.53477	9.8	n
	2.21463	0.185	n
	1.44939	0.125	n
	8.86549	30	n
	3.17908	0.9	y
	4.05874	14.9	y
	3.82695	40	y
	5.31403	5	y
	10.0904	8	y
	10.4898	7	y
	6.7848	25	y
	5.61637	8	y
	4.30391	14	y
	5.63523	45	superstall
Ndc80-P, 100nM P-Ska	2.39083	0.168	n
	2.77462	0.86	n
	3.73635	0.44	n
	2.43553	0.24	n
	3.86549	0.2	n
	5.42615	1.85	n
	2.45619	0.25	n
	1.53455	0.9	n
	2.52356	0.63	n
	0.51019	0.39	n
	2.67895	1.36	n
	5.23454	3.9	n
	3.63509	1.16	n
	3.13226	21	n
	4.96104	25	y
	2.59006	9.5	y
	2.29968	0.5	y
Ndc80-P, 100nM NP-Ska	0.73331	2.2	n
	1.56142	1.3	n
	4.34185	0.17	n
	5.24581	7.39	n
	5.08045	0.89	n
	2.15685	0.51	n
	3.53197	60	n
	6.65957	2.8	n
	1.81288	0.21	n
	2.72928	0.46	n
	1.58202	0.13	n
	4.75939	0.14	n
	2.6373	0.33	n
	7.55265	1.7	n
	4.51673	0.22	n
	4.49455	0.14	n
	0.93371	0.5	n
	3.80412	4	y
	4.8415	9.5	y
	3.34508	1.7	y
	4.0121	1.2	y
Ndc80-d80, 100nM P-Ska	3.08807	0.22	n
	0.99655	0.35	n
	1.59545	16	n
	1.77794	0.0215	n
	3.47031	1.03	n
	0.94866	0.24	n
	2.26112	4.4	n
	3.66881	1.1	n
	2.40498	15	n
	5.67537	28	n
	2.5101	2.8	n
	3.98433	1.8	n
	3.23728	0.99	n
	2.19455	0.51	n
	1.37937	12	y
	2.07731	60	y
	4.86797	4	y
	6.12611	13	y
	3.15592	1	y
Ndc80-d80, 100nM NP-Ska	1.59539	0.35	n
	2.37527	5	n
	2.69085	0.36	n
	1.10053	1.7	n
	1.14012	0.31	n
	2.28259	0.023	n
	3.22822	24	n
	2.44667	0.92	n
	1.522	0.12	n
	4.87881	6.2	n
	1.89467	0.065	n
	2.37813	0.46	n
	0.91235	0.08	n
	2.64084	14	y
Ndc80-FL, 100nM P-Ska-dMTBD	1.13819	0.032	n
	6.40372	0.835	n
	2.07062	0.27	n
	3.72482	0.55	n
	1.5796	0.022	n
	2.78211	0.19	n
	1.88105	1.43	n
	2.93018	0.57	n
	1.67046	1.45	y
	1.59147	3	y
	3.16334	9	y
	3.47573	7	y
Ndc80-FL, 100nM NP-Ska-dMTBD	4.16833	0.97	n
	1.33911	0.75	n
	1.8842	1.5	n
	4.84927	0.8	n
	1.09413	0.07	n
	1.19441	0.07	n
	0.875317	0.15	n
	3.981	0.19	n
	5.35942	1.22	n
	3.93043	0.23	n
	2.84691	0.75	n
	1.66861	30	y
	3.1742	30	y
Ndc80-FL, 100nM Ska-SKA3dC	2.97262	6.2	n
	3.86309	0.96	n
	1.62977	0.52	n
	2.66696	0.13	n
	6.2947	10	n
	1.87863	1.55	n
	1.03318	2.9	n
	1.66297	0.8	n
	0.93791	3.2	y
	2.52624	300	superstall
	4.51799	175	superstall
	1.85215	100	superstall
